# Supplementary material for: Campylobacter jejuni Demonstrates Conserved Proteomic and Transcriptomic Responses When Co-cultured With Human INT 407 and Caco-2 Epithelial Cells
Source: Front Microbiol. 2019 Apr 11;10:755. doi: 10.3389/fmicb.2019.00755 (PMC6470190; doi:10.3389/fmicb.2019.00755)
Supplement: Supplementary file 2 [file Table_2.XLSX]

## Sheet: Legend
Campylobacter jejuni demonstrates conserved proteomic and transcriptomic responses when co-cultured with human INT 407 and Caco-2 epithelial cells
Nicholas M. Negretti,1 Geremy Clair,2 Prabhat K. Talukdar,1 Christopher R. Gourley,1 Steven Huynh,3 Joshua N. Adkins,2 Craig T. Parker,3 and Colby M. Corneau, 1 Michael E. Konkel1*
1 School of Molecular Biosciences, College of Veterinary Medicine, Washington State University, Pullman, WA, USA, 99164-7520.
2 Integrative Omics, Pacific Northwest National Laboratory, 902 Battelle Boulevard, Richland, Washington 99352
3 Produce Safety and Microbiology, USDA Agricultural Research Service, 800 Buchanan St., Albany CA 94710
*To whom correspondence should be addressed: Dr. Michael E. Konkel, Biotechnology Life Sciences Building, Room 447, Washington State University, Pullman WA 99164, Telephone: 509-335-5039; Email: konkel@vetmed.wsu.edu
STable 2. Genes whose expression is increased or decreased during C. jejuni co-culture with INT 407 and Caco-2 cells. Genes that were significantly upregulated or downregulated during co-culture with INT 407 or Caco-2 cells were compared, and genes that were significantly altered in both cell types (cell-type independent responses) are reported. Genes were considered significantly differentially …

## Sheet: Up both
Up for both cell types by RNA-Seq (Figure 4B)											COG enrichment
81-176 gene	Symbol	Annotation	COG category	log2FC(Caco-2 / MH)	FDR Caco-2 / MH	log2FC(INT 407 / MH)	FDR INT / MH				COG	Count	p value	FDR	Odds ratio	COG function description
CJJ81176_RS00085	dsbI	disulphide bond formation protein	O	2.00313	5.16562e-05	2.00422	4.6696e-05				P	24	8.1458e-05	0.00219936	2.83957	Inorganic ion transport and metabolism
CJJ81176_RS00090	dba	disulphide bond formation protein	Uncategorized	3.33428	6.86163e-12	3.56528	1.0127e-13				V	8	0.0564631	0.762252	2.14372	Defense mechanisms
CJJ81176_RS00115	purB	adenylosuccinate lyase	F	0.980157	0.00594808	0.767064	0.0405806				J	26	0.0920727	0.828655	1.39312	Translation, ribosomal structure and biogenesis
CJJ81176_RS00210		transglycosylase	M	1.30888	0.0193171	1.77	0.000465823				T	11	0.170364	0.926802	1.4635	Signal transduction mechanisms
CJJ81176_RS00245	typA	GTP-binding protein TypA homolog	T	0.788936	0.034807	0.757887	0.0442266				I	8	0.200171	0.926802	1.50551	Lipid transport and metabolism
CJJ81176_RS00375	Cj0067	putative amidohydrolase family protein	FR	1.30338	0.0271126	1.4681	0.00910945				O	13	0.205956	0.926802	1.35177	Posttranslational modification, protein turnover, chaperones
CJJ81176_RS00380	pspA	protease	O	2.32785	0.000164762	2.23194	0.000282312				S	10	0.306603	1	1.25824	Function unknown
CJJ81176_RS00530	birA	putative biotin--[acetyl-CoA-carboxylase] synthetase	H	1.95	0.00020479	1.90396	0.000250164				F	8	0.320132	1	1.28052	Nucleotide transport and metabolism
CJJ81176_RS00565	atpG	ATP synthase F1 sector gamma subunit	C	0.903252	0.0108028	0.932232	0.00708307				M	17	0.438182	1	1.07381	Cell wall/membrane/envelope biogenesis
CJJ81176_RS00590	Cj0111	putative periplasmic protein	M	1.14454	0.038195	0.968739	0.0877253				K	7	0.457451	1	1.11657	Transcription
CJJ81176_RS00710	Cj0135	conserved hypothetical protein Cj0135	R	1.88173	0.0316108	2.61385	0.000940997				L	9	0.478591	1	1.0736	Replication, recombination and repair
CJJ81176_RS00750	Cj0143c	putative periplasmic solute binding protein for ABC transport system	P	1.00038	0.00407574	1.23007	0.000179742				H	11	0.542338	1	1.00684	Coenzyme transport and metabolism
CJJ81176_RS00765	trxB	thioredoxin reductase	O	2.74301	9.92063e-10	2.69429	1.98747e-09				R	14	0.573213	1	0.979575	General function prediction only
CJJ81176_RS00770	trxA	thioredoxin	O	1.12391	0.00531871	1.30174	0.000847973				Q	2	0.716122	1	0.806464	Secondary metabolites biosynthesis, transport and catabolism
CJJ81176_RS00805	Cj0154c	putative tetrapyrrole methylase family protein	J	2.33932	0.00197008	1.96794	0.0119001				E	15	0.786007	1	0.827913	Amino acid transport and metabolism
CJJ81176_RS00810	rpmE	50S ribosomal protein L31	J	2.11313	0.000289989	2.32696	3.86586e-05				D	1	0.933245	1	0.363228	Cell cycle control, cell division, chromosome partitioning
CJJ81176_RS00850	Cj0163c	hypothetical protein Cj0163c	Uncategorized	2.31197	0.0048372	2.56931	0.0011311				U	4	0.935618	1	0.52893	Intracellular trafficking, secretion, and vesicular transport
CJJ81176_RS00860	miaA	tRNA delta(2)-isopentenylpyrophosphate transferase	J	2.54527	0.00215655	2.46852	0.00288011				Uncategorized	22	0.966686	1	0.67464	Uncategorized
CJJ81176_RS00880	sodB	superoxide dismutase (Fe)	P	0.607306	0.0528594	0.754879	0.0113413				N	3	0.991308	1	0.334278	Cell motility
CJJ81176_RS00900	cfbpC	putative iron-uptake ABC transport system ATP-binding protein	E	3.74751	3.04385e-08	3.90633	4.89346e-09				G	2	0.995857	1	0.249104	Carbohydrate transport and metabolism
CJJ81176_RS00905	cfbpB	putative iron-uptake ABC transport system permease protein	P	1.83292	0.00779476	2.06237	0.00193085				C	2	0.999993	1	0.126711	Energy production and conversion
CJJ81176_RS00910	cfbpA	putative iron-uptake ABC transport system,periplasmic iron-binding protein	P	4.28149	2.60369e-20	4.34598	5.39631e-21				A	0	1	1	0	RNA processing and modification
CJJ81176_RS00915	Cj0176c	putative lipoprotein	Uncategorized	2.14608	0.00645383	1.48134	0.0840999				B	0	1	1	0	Chromatin structure and dynamics
CJJ81176_RS00920	Cj0182	putative transmembrane transport protein	I	1.40136	0.0635781	1.58338	0.0294361				Y	0	1	1	0	Nuclear structure
CJJ81176_RS00935		putative phnA domain protein	K	1.91562	0.0217831	1.9522	0.0167936				Z	0	1	1	0	Cytoskeleton
CJJ81176_RS01030	Cj0204	putative oligopeptide transporter, OPT family	S	0.724471	0.0483775	0.97601	0.00392394				W	0	1	1	0	Extracellular structures
CJJ81176_RS01045	infC	translation initiation factor IF-3	J	0.950335	0.0770977	0.977228	0.0661644				X	0	1	1	0	Mobilome: prophages, transposons
CJJ81176_RS01085	argC	N-acetyl-gamma-glutamyl-phosphate reductase	E	1.87621	1.26037e-06	2.02039	1.05107e-07
CJJ81176_RS01090	Cj0225	putative acetyltransferase	J	2.03608	0.00371348	2.07279	0.00258944
CJJ81176_RS01095	argB	acetylglutamate kinase	E	2.11221	0.000955287	1.8586	0.00437981
CJJ81176_RS01100	argD	putative acetylornithine/succinyldiaminopimelate aminotransferase	E	1.74966	0.0142074	1.79066	0.0103205
CJJ81176_RS01110	Cj0229	putative acetyltransferase	R	1.06872	0.0828179	1.10034	0.0704048
CJJ81176_RS01130	pyrE	putative orotate phosphoribosyltransferase	F	1.19566	0.0113493	1.1196	0.0182276
CJJ81176_RS01165	iscS	cysteine desulfurase (NifS protein homolog)	E	1.03393	0.0193915	1.02215	0.0201376
CJJ81176_RS01180	rpmI	50s ribosomal protein L35	J	0.964437	0.0898763	1.23486	0.0216643
CJJ81176_RS01185	rplT	50S ribosomal protein L20	J	1.77823	2.97995e-07	1.9027	2.51911e-08
CJJ81176_RS01235	exoA	exodeoxyribonuclease	L	1.53945	0.00271187	1.65582	0.000895305
CJJ81176_RS01240	Cj0256	putative sulfatase family protein	M	1.0679	0.0832574	1.10663	0.0701186
CJJ81176_RS01245	dgkA	diacylglycerol kinase	I	1.92116	0.032341	2.312	0.00601345
CJJ81176_RS01395	lpxB	lipid-A-disaccharide synthase	M	1.09445	0.019823	1.1126	0.0153698
CJJ81176_RS01400	peb3	major antigenic peptide PEB3	M	4.1754	1.32613e-17	4.39609	1.6851e-19
CJJ81176_RS01445	Cj0302c	putative molybdenum-pterin binding protein	H	1.07916	0.0517571	1.22984	0.0196338
CJJ81176_RS01450	modA	putative molybdate-binding lipoprotein	P	1.83605	2.75851e-06	1.67087	2.32228e-05
CJJ81176_RS01485	Cj0310c	putative efflux protein	V	2.08129	0.00380293	1.79452	0.0151435
CJJ81176_RS01545	perR	peroxide stress regulator	P	1.94461	0.000925711	1.90306	0.00114722
CJJ81176_RS01605	ahpC	alkyl hydroperoxide reductase	V	2.54725	1.56948e-14	2.58263	6.89948e-15
CJJ81176_RS01665	trpD	anthranilate synthase component II	EH	1.39664	0.00877163	1.73433	0.000543962
CJJ81176_RS01670	trpF	N-(5'-phosphoribosyl)anthranilate isomerase	E	1.66406	0.0192431	1.64368	0.0190307
CJJ81176_RS01675	trpB	tryptophan synthase beta chain	E	2.20361	1.88842e-05	2.18439	2.02532e-05
CJJ81176_RS01680	trpA	tryptophan synthase alpha chain	E	2.66815	5.38519e-06	2.59654	9.1602e-06
CJJ81176_RS01685	Cj0350	hypothetical protein Cj0350	Uncategorized	1.40745	0.0590489	1.33868	0.077475
CJJ81176_RS01830	Cj0379c	putative molybdenum containing oxidoreductase	C	2.74854	8.54926e-12	2.97988	6.58313e-14
CJJ81176_RS02145	Cj0440c	putative transcriptional regulator	H	1.33557	0.00954981	1.46974	0.00304351
CJJ81176_RS02165	Cj0444	ligand-gated channel	P	4.50448	4.43518e-32	4.37676	1.45008e-30
CJJ81176_RS02170	Cj0447	putative NUDIX hydrolase family protein	V	1.70489	0.000372522	1.51884	0.0016752
CJJ81176_RS02250	Cj0463	zinc protease-like protein	R	1.22782	0.00266991	1.27352	0.00146082
CJJ81176_RS02260	ctb	group III truncated haemoglobin	P	1.51588	0.0295403	1.75385	0.00785077
CJJ81176_RS02265	nssR	transcriptional regulator	T	1.89022	0.054626	2.24532	0.0157186
CJJ81176_RS02445	hemH	putative ferrochelatase	H	1.83516	0.0197871	1.97917	0.00910945
CJJ81176_RS02455	Cj0505c	putative aminotransferase (degT family). Functional classification-Misc	M	1.1985	0.0307757	1.21222	0.0274969
CJJ81176_RS02485	Cj0511	putative secreted protease	O	0.731067	0.034807	0.657718	0.0649111
CJJ81176_RS02520	htpG	hsp90 family heat shock protein	O	0.870676	0.0230511	0.845092	0.0274969
CJJ81176_RS02610	Cj0539	hypothetical protein Cj0539	Uncategorized	1.86028	0.00380293	1.92427	0.00221405
CJJ81176_RS02710	Cj0559	putative pyridine nucleotide-disulphide oxidoreductase	O	1.35574	3.35814e-06	1.30856	7.43035e-06
CJJ81176_RS02830	Cj0581	putative NUDIX hydrolase family protein	V	1.18267	0.0178138	1.08412	0.0303922
CJJ81176_RS02855	ligA	DNA ligase	L	1.30515	0.00292411	1.33427	0.00196974
CJJ81176_RS02870	ribF	putative riboflavin kinase/FMN adenylyltransferase	H	1.5762	0.0527092	1.40992	0.0877253
CJJ81176_RS03025	Cj0621	hypothetical protein Cj0621	O	2.51917	2.29811e-07	2.70184	1.50571e-08
CJJ81176_RS03080	Cj0633	putative periplasmic protein	G	1.33283	0.0285443	1.25774	0.039612
CJJ81176_RS03125	recN	putative DNA repair protein	L	1.28469	0.0285443	1.64333	0.0023045
CJJ81176_RS03160	Cj0649	putative OstA family protein	M	2.41888	0.000715935	2.58162	0.000193728
CJJ81176_RS03165	engB	putative ATP/GTP binding protein	D	2.01357	0.0315956	2.31372	0.00976895
CJJ81176_RS03295	Cj0682	hypothetical protein Cj0682	Uncategorized	0.785055	0.0993413	0.976973	0.0289025
CJJ81176_RS03420	kdtA	3-deoxy-D-manno-octulosonic-acid transferase	M	2.05671	0.0109384	2.16271	0.00584944
CJJ81176_RS03430	ffh	signal recognition particle protein	U	0.858812	0.0540828	0.81641	0.0704048
CJJ81176_RS03440	Cj0711	hypothetical protein Cj0711	R	1.77979	0.000612243	1.89509	0.000175708
CJJ81176_RS03460	Cj0715	transthyretin-like periplasmic protein	F	2.52914	1.61127e-05	2.60916	7.75735e-06
CJJ81176_RS03465	Cj0716	putative phospho-2-dehydro-3-deoxyheptonate aldolase	E	1.7405	0.0147401	1.72314	0.0153698
CJJ81176_RS03470	Cj0717	putative ArsC family protein	P	1.73338	0.000628418	1.87573	0.000132294
CJJ81176_RS03490	Cj0721c	putative integral membrane protein. Functional classification-Membranes, lipoproteins and porins	Uncategorized	1.3589	0.000783311	1.48928	0.000138034
CJJ81176_RS03495	Cj0722c	putative DNA methylase	J	1.87673	0.0411896	2.03836	0.0219796
CJJ81176_RS03505	Cj0724	hypothetical protein Cj0724	Uncategorized	1.36965	0.0836952	1.31582	0.0964586
CJJ81176_RS03525	Cj0728	putative periplasmic protein	S	2.14473	0.0315956	2.18618	0.0266184
CJJ81176_RS03615		hypothetical protein	Uncategorized	1.08686	0.0350978	0.997407	0.0572337
CJJ81176_RS03705	flgA	putative flagellar protein FlgA	N	1.92762	0.00752578	1.98134	0.00494212
CJJ81176_RS03745	Cj0777	putative ATP-dependent DNA helicase	L	1.47938	0.0193915	1.38905	0.0282451
CJJ81176_RS03755	tpx	thiol peroxidase	O	1.47237	0.0113493	1.22856	0.0419394
CJJ81176_RS03910	nadE	NH(3)-dependent NAD(+) synthetase	H	1.52158	0.00152861	1.27398	0.00999265
CJJ81176_RS03935	glnH	putative glutamine binding periplasmic protein	ET	1.39007	0.000437593	1.27947	0.00130616
CJJ81176_RS04075	psd	phosphatidylserine decarboxylase proenzyme	I	1.45466	0.0047495	1.52327	0.00236908
CJJ81176_RS04195	Cj0878	hypothetical protein Cj0878	Uncategorized	1.93751	0.0441484	2.42542	0.00730271
CJJ81176_RS04205	Cj0880c	hypothetical protein Cj0880c	Uncategorized	2.21068	0.012733	1.67464	0.0762918
CJJ81176_RS04210	Cj0881c	hypothetical protein Cj0881c	JT	1.36424	0.04165	1.17794	0.0869177
CJJ81176_RS04225	rpsO	30S ribosomal protein S15	J	1.68935	0.0535115	2.23039	0.00657696
CJJ81176_RS04250	Cj0888c	ABC transport system ATP-binding protein	R	1.39445	0.051222	1.35089	0.0601017
CJJ81176_RS04290	pheT	phenylalanyl-tRNA synthetase beta chain	J	0.769145	0.00995554	0.775545	0.00811491
CJJ81176_RS04300	Cj0898	putative histidine triad (HIT) family protein	FGR	0.991783	0.0311553	1.00186	0.0277545
CJJ81176_RS04340	Cj0906c	putative periplasmic protein	M	1.261	0.0023581	1.13256	0.0071762
CJJ81176_RS04375	ciaB	CiaB protein	M	1.90182	8.59747e-05	1.89006	8.24492e-05
CJJ81176_RS04425	cheB'	putative MCP protein-glutamate methylesterase	NT	0.913525	0.0770417	0.922201	0.0729265
CJJ81176_RS04480	Cj0935c	putative sodium:amino-acid symporter family protein	R	1.21921	0.00198691	1.10929	0.00543653
CJJ81176_RS04500		hypothetical protein	R	2.84173	0.00049542	3.16346	5.54812e-05
CJJ81176_RS04610	Cj0946	putative lipoprotein	M	1.44827	0.075429	1.3689	0.0922731
CJJ81176_RS04640	purH	phosphoribosylaminoimidazolecarboxamide formyltransferase / IMP cyclohydrolase	F	0.867292	0.0569367	0.870297	0.0558044
CJJ81176_RS04645	Cj0954c	putative DnaJ-like protein	O	1.2681	0.0990977	1.25777	0.0990145
CJJ81176_RS04660	Cj0957c	hypothetical protein Cj0957c	R	0.937058	0.0770977	1.06149	0.0368874
CJJ81176_RS04685	Cj0962	putative acetyltransferase	KR	2.63569	5.88931e-05	2.32479	0.000483492
CJJ81176_RS04745	Cj0979c	putative secreted nuclease	L	2.55428	0.00202618	2.42626	0.00346579
CJJ81176_RS04895	Cj1009c	conserved hypothetical proetin Cj1009c	S	1.02963	0.0293634	0.858571	0.0782002
CJJ81176_RS05000	mapA	putative liproprotein	Uncategorized	1.41111	0.000752952	1.42528	0.000574836
CJJ81176_RS05025	Cj1034c	putative DnaJ-like protein	K	1.26789	0.0414726	1.34411	0.0274969
CJJ81176_RS05205	rpsR	30S ribosomal protein S18	J	1.15476	0.0202186	1.40422	0.00265928
CJJ81176_RS05285	folC	folylpolyglutamate synthase/dihydrofolate synthase	H	2.42335	0.000136214	2.83589	2.92397e-06
CJJ81176_RS05315	yajC	putative preprotein translocase protein	U	0.97124	0.0702856	1.17995	0.0196338
CJJ81176_RS05460	pglC	galactosyltransferase	M	1.32837	0.0560077	1.41337	0.0371998
CJJ81176_RS05485	pglH	GalNAc transferase/polymerase	M	1.74126	0.00454374	1.45908	0.0212293
CJJ81176_RS05505	waaC	heptosyltransferase I	M	1.35675	0.0231765	1.55578	0.00587006
CJJ81176_RS05510	htrB	putative lipid A biosynthesis lauroyl acyltransferase	I	1.57899	0.0193915	1.47276	0.0290667
CJJ81176_RS05600	gmhB	D,D-heptose 1,7-bisphosphate phosphatase	E	1.9658	0.00122094	1.99083	0.000909366
CJJ81176_RS05640	Cj1162c	putative heavy-metal-associated domain protein	P	2.0616	0.0230511	1.72795	0.0671938
CJJ81176_RS05675	Cj1169c	putative periplasmic protein	Uncategorized	2.21723	0.00161566	1.97264	0.00601829
CJJ81176_RS05680	omp50	50 kda outer membrane protein precursor	Uncategorized	1.93551	0.00118936	1.74196	0.00422838
CJJ81176_RS05735	tsf	elongation factor TS	J	1.22473	1.27848e-05	1.18798	2.30471e-05
CJJ81176_RS05740	rpsB	30S ribosomal protein S2	J	1.38071	0.000265353	1.14436	0.00331038
CJJ81176_RS05745	cfa	cyclopropane-fatty-acyl-phospholipid synthase	I	2.71361	9.13707e-06	2.59379	2.43628e-05
CJJ81176_RS05775	cetB	bipartate energy taxis response protein cetB	KT	1.12538	0.00738526	1.1882	0.00394445
CJJ81176_RS05780	cetA	bipartate energy taxis response protein cetA	NT	0.980222	0.0022689	0.826293	0.0131791
CJJ81176_RS05965	Cj1226c	putative two-component sensor (histidine kinase)	T	1.45606	0.0253419	1.5997	0.0113413
CJJ81176_RS06020	Cj1237c	putative phosphatase	FTP	1.92041	0.00765046	1.99758	0.00437981
CJJ81176_RS06065	uvrC	excinuclease ABC subunit C	L	1.23901	0.0881628	1.35382	0.0560389
CJJ81176_RS06070	Cj1247c	hypothetical protein Cj1247c	Uncategorized	1.49357	0.0230511	1.65116	0.00861365
CJJ81176_RS06115	Cj1256c	putative membrane protein	Uncategorized	1.17577	0.0275581	1.40525	0.0050458
CJJ81176_RS06175	mnmC	putative FAD dependent oxidoreductase	EJ	1.47472	0.0856313	1.43103	0.0939915
CJJ81176_RS06325		N-acetyltransferase	V	0.989973	0.050929	1.03611	0.0373622
CJJ81176_RS06335		hypothetical protein	IQR	1.10643	0.0491376	1.3135	0.0133862
CJJ81176_RS06350	acpP3	putative acyl carrier protein	IQ	1.55781	0.00215655	1.74748	0.00035212
CJJ81176_RS06425	Cj1335	motility accessory factor (function unknown)	S	1.07836	0.0389326	1.1849	0.0188975
CJJ81176_RS06445		motility accessory factor	S	1.10182	0.0264407	1.39737	0.00221405
CJJ81176_RS06485	Cj1349c	putative fibronectin/fibrinogen-binding protein	J	1.29694	0.062075	1.41325	0.0365732
CJJ81176_RS06500	ceuB	enterochelin uptake permease	P	3.03917	0.000185674	3.22602	4.63816e-05
CJJ81176_RS06505	ceuC	enterochelin uptake permease	P	1.88864	0.0665455	2.27438	0.0194706
CJJ81176_RS06510	ceuD	enterochelin uptake ATP-binding protein	P	3.02236	0.000833909	3.05839	0.000619273
CJJ81176_RS06515	ceuE	enterochelin uptake periplasmic binding protein	P	2.41964	9.02558e-10	2.28659	6.98747e-09
CJJ81176_RS06585	Cj1367c	putative nucleotidyltransferase	OT	1.75496	8.02515e-05	1.71247	0.000100937
CJJ81176_RS06625	Cj1374c	conserved hypothetical protein Cj1374c	F	1.79533	0.0361186	1.58525	0.0719779
CJJ81176_RS06640	selA	L-seryl-tRNA(SeC) selenium transferase	J	0.937371	0.0898763	0.945007	0.0832062
CJJ81176_RS06665	Cj1383c	hypothetical protein Cj1383c	Uncategorized	4.72883	2.06891e-18	4.25398	5.434e-15
CJJ81176_RS06670	Cj1384c	hypothetical protein Cj1384c	S	5.06935	4.04463e-18	5.09862	2.43975e-18
CJJ81176_RS06675	katA	catalase	P	5.37436	3.85002e-20	5.34704	5.26561e-20
CJJ81176_RS06680	Cj1386	ankyrin-repeat containing protein	T	3.97993	5.79236e-11	3.96046	6.23843e-11
CJJ81176_RS06750	nadD	putative nicotinate-nucleotide adenylyltransferase	H	1.7291	0.0347896	1.84926	0.0197844
CJJ81176_RS06755	Cj1405	conserved hypothetical protein Cj1405	J	1.09959	0.0770417	1.27708	0.0315844
CJJ81176_RS06925	kpsD	capsule polysaccharide export system periplasmic protein	M	0.635076	0.0995447	0.634841	0.0990145
CJJ81176_RS06980	Cj1456c	putative periplasmic protein	Uncategorized	1.90708	0.00752578	2.23195	0.000917075
CJJ81176_RS07095	rplM	50S ribosomal protein L13	J	0.852059	0.0789963	1.00287	0.0314091
CJJ81176_RS07100	Cj1481c	putative helicase	L	1.46826	0.0169138	1.66468	0.00422838
CJJ81176_RS07105	Cj1482c	hypothetical protein Cj1482c	L	1.12206	0.0770977	1.27268	0.0365044
CJJ81176_RS07170	Cj1495c	conserved hypothetical protein Cj1495c	S	1.1116	0.0329328	1.06545	0.0414871
CJJ81176_RS07230	Cj1507c	putative regulatory protein	K	0.962633	0.0370513	0.87221	0.0652504
CJJ81176_RS07280	moaD	putative molybdopterin converting factor,subunit 1	H	1.25666	0.0536337	1.21141	0.0657683
CJJ81176_RS07295		hypothetical protein	Uncategorized	2.26932	0.0113891	1.92462	0.0375215
CJJ81176_RS07300		hypothetical protein	R	1.37749	0.0650951	1.26333	0.0947439
CJJ81176_RS07315	dapF	diaminopimelate epimerase	E	1.04598	0.050929	0.940436	0.0837039
CJJ81176_RS07325	Cj1533c	putative helix-turn-helix containing protein	R	0.951539	0.0848966	1.05889	0.0486165
CJJ81176_RS07330	Cj1534c	putative bacterioferritin	PV	1.62892	0.00202618	1.66132	0.00154468
CJJ81176_RS07455	Cj1563c	putative transcriptional regulator	K	1.44845	0.0444203	1.44036	0.0440622
CJJ81176_RS07590	Cj1587c	putative ABC transporter	P	2.67084	4.27967e-09	2.58292	1.22851e-08
CJJ81176_RS07630	rpoA	DNA-directed RNA polymerase alpha chain	K	0.775599	0.0230511	0.822751	0.0137342
CJJ81176_RS07635	rplQ	50S ribosomal protein L17	J	0.890351	0.0516856	1.04285	0.0173117
CJJ81176_RS07640	hisG	ATP phosphoribosyltransferase	E	0.800869	0.0133666	1.00384	0.000909366
CJJ81176_RS07665	Cj1602	conserved hypothetical protein Cj1602	S	1.04743	0.0957006	1.20778	0.0442266
CJJ81176_RS07720	Cj1613c	putative pyridoxamine 5'-phosphate oxidase	P	4.86529	1.06286e-27	4.58003	8.84008e-25
CJJ81176_RS07725	chuA	haemin uptake system outer membrane receptor	P	5.06118	3.23988e-15	4.93637	1.6804e-14
CJJ81176_RS07730	chuB	putative haemin uptake system permease protein	P	5.28161	3.07072e-19	5.13123	2.87775e-18
CJJ81176_RS07735	chuC	putative haemin uptake system ATP-binding protein	PH	4.44862	1.65466e-11	4.20936	2.14083e-10
CJJ81176_RS07740	chuD	putative haemin uptake system periplasmic haemin-binding protein	P	5.8647	4.65698e-23	5.75533	2.60872e-22
CJJ81176_RS07755	mutY	A/G-specific adenine glycosylase	L	1.2587	0.0978372	1.25044	0.0968489
CJJ81176_RS07810	Cj1627c	hypothetical protein Cj1627c	Uncategorized	1.11911	0.0226011	1.2476	0.00788783
CJJ81176_RS07815	exbB2	putative exbB/tolQ family transport protein	U	3.44931	1.22368e-14	3.71999	3.55807e-17
CJJ81176_RS07820	exbD2	putative exbD/tolR family transport protein	U	2.59552	0.000605794	2.6473	0.000352785
CJJ81176_RS07825	tonB2	putative TonB transport protein	M	3.14257	3.99201e-06	3.20407	1.98168e-06
CJJ81176_RS07830	Cj1631c	conserved hypothetical protein Cj1631c	Uncategorized	1.23831	0.056853	1.33635	0.0365732
CJJ81176_RS07955	Cj1656c	hypothetical protein Cj1656c	Uncategorized	1.01116	0.00752578	1.5641	5.75762e-06
CJJ81176_RS07965	Cj1658	putative iron permease	P	1.51195	0.050929	1.62891	0.0326469
CJJ81176_RS07970	p19	periplasmic protein p19	MI	2.7478	8.38358e-09	2.41042	6.81683e-07
CJJ81176_RS07975	Cj1660	putative integral membrane protein	S	1.25125	0.0976262	1.37963	0.0643926
CJJ81176_RS07980	Cj1661	possible ABC transport system permease	V	1.15427	0.0886578	1.1591	0.0869177
CJJ81176_RS07985	Cj1662	putative integral membrane protein	V	1.53462	0.0193915	1.6171	0.0117293
CJJ81176_RS07995	Cj1664	putative periplasmic thiredoxin	O	1.84503	0.000754467	1.92243	0.000339298
CJJ81176_RS08000	Cj1665	putative lipoprotein thiredoxin	O	2.10146	0.000715935	2.2446	0.000204203
CJJ81176_RS08005	Cj1666c	putative periplasmic protein	S	1.5768	0.000733039	1.70432	0.000167754
CJJ81176_RS08155	rpsH	30S ribosomal protein S8	J	1.43344	0.00208739	1.20087	0.0130569
CJJ81176_RS08170	rplX	50S ribosomal protein L24	J	1.52774	0.0127829	1.30927	0.0382391
CJJ81176_RS08215	rplW	50S ribosomal protein L23	J	1.70901	0.0134604	1.26593	0.0860539
CJJ81176_RS08230	rpsJ	30S ribosomal protein S10	J	0.891766	0.054626	0.80528	0.0898997
CJJ81176_RS08235	Cj1709c	putative ribosomal pseudouridine synthase	J	1.62763	0.00429983	1.91252	0.000425827
CJJ81176_RS08240	Cj1710c	putative metallo-beta-lactamase family protein	J	0.93473	0.0602373	1.37135	0.00256724

## Sheet: Down both
Down for both cell types by RNA-Seq (Figure 4B)											COG enrichment
81-176 gene	Symbol	Annotation	COG category	log2FC(Caco-2 / MH)	FDR Caco-2 / MH	log2FC(INT 407 / MH)	FDR INT / MH				COG	Count	p value	FDR	Odds ratio	COG function description
CJJ81176_RS00060	rrc	non-haem iron protein	C	-2.5283	0.000412372	-2.83612	4.63816e-05				C	70	5.23807e-36	1.41428e-34	13.8537	Energy production and conversion
CJJ81176_RS00065	ilvD	dihydroxy-acid dehydratase	EG	-0.633668	0.0771654	-0.825124	0.0138829				E	28	0.0171307	0.231264	1.67045	Amino acid transport and metabolism
CJJ81176_RS00105	Cj0021c	putative fumarylacetoacetate (FAA) hydrolase family protein	Q	-1.45727	0.000318921	-1.35023	0.00074662				G	12	0.0733388	0.660049	1.73308	Carbohydrate transport and metabolism
CJJ81176_RS00145	ansA	cytoplasmic L-asparaginase	JU	-2.54816	3.16668e-07	-2.90223	2.95743e-09				P	13	0.351142	1	1.17064	Inorganic ion transport and metabolism
CJJ81176_RS00175		cytochrome c	O	-3.47708	4.39123e-06	-3.82127	2.98189e-07				N	10	0.363533	1	1.1884	Cell motility
CJJ81176_RS00180		membrane protein	C	-2.76566	0.000372522	-3.45329	3.55348e-06				O	12	0.392412	1	1.13742	Posttranslational modification, protein turnover, chaperones
CJJ81176_RS00185		thioredoxin	O	-2.23021	0.0274941	-3.09123	0.00110149				T	9	0.486618	1	1.0662	Signal transduction mechanisms
CJJ81176_RS00190		cytochrome c biogenesis protein	CO	-1.70211	0.0480879	-1.58588	0.0688777				R	12	0.8495	1	0.758261	General function prediction only
CJJ81176_RS00195		gamma-glutamyltranspeptidase	E	-1.63405	0.0193915	-1.84223	0.00646909				I	4	0.871281	1	0.627837	Lipid transport and metabolism
CJJ81176_RS00335	fliY	putative flagellar motor switch protein	NU	-0.757146	0.0329769	-0.73233	0.0375215				S	6	0.88892	1	0.647925	Function unknown
CJJ81176_RS00360	flhF	flagellar biosynthesis protein	N	-1.16318	0.02804	-0.996665	0.0671938				H	8	0.912445	1	0.648374	Coenzyme transport and metabolism
CJJ81176_RS00370	aroQ	3-dehydroquinate dehydratase	E	-1.46225	0.0535761	-1.42423	0.0649111				Q	1	0.936774	1	0.35535	Secondary metabolites biosynthesis, transport and catabolism
CJJ81176_RS00405	Cj0073c	conserved hypothetical protein Cj0073c	C	-3.41251	5.33535e-26	-3.61646	1.22858e-29				D	1	0.944609	1	0.338225	Cell cycle control, cell division, chromosome partitioning
CJJ81176_RS00410	Cj0074c	putative iron-sulfur protein	C	-3.68705	1.31673e-50	-3.97613	1.29061e-59				V	2	0.952825	1	0.403632	Defense mechanisms
CJJ81176_RS00415	Cj0075c	putative oxidoreductase iron-sulfur subunit	C	-3.14186	8.1629e-31	-3.50367	1.09687e-38				U	4	0.954125	1	0.491992	Intracellular trafficking, secretion, and vesicular transport
CJJ81176_RS00420	lctP	L-lactate permease	C	-2.48977	1.37343e-07	-2.5553	5.52363e-08				F	3	0.976126	1	0.396614	Nucleotide transport and metabolism
CJJ81176_RS00430	cdtB	cytolethal distending toxin B	R	-1.22751	0.000152752	-1.30961	2.95727e-05				K	2	0.99402	1	0.263607	Transcription
CJJ81176_RS00470	aspA	aspartate ammonia-lyase	E	-2.27585	7.86349e-05	-2.40077	2.40855e-05				Uncategorized	20	0.995989	1	0.557192	Uncategorized
CJJ81176_RS00475	dcuA	anaerobic C4-dicarboxylate transporter	G	-3.4003	1.56337e-16	-3.29995	1.2867e-15				M	8	0.997116	1	0.420346	Cell wall/membrane/envelope biogenesis
CJJ81176_RS00560	atpA	ATP synthase F1 sector alpha subunit	C	-0.596727	0.0192377	-0.61235	0.0138597				L	2	0.999323	1	0.194572	Replication, recombination and repair
CJJ81176_RS00570	atpD	ATP synthase F1 sector beta subunit	C	-0.651699	0.0282061	-0.630362	0.0344207				J	4	1	1	0.157402	Translation, ribosomal structure and biogenesis
CJJ81176_RS00645		hypothetical protein	Uncategorized	-0.820528	0.0849764	-0.904414	0.050067				A	0	1	1	0	RNA processing and modification
CJJ81176_RS00875	Cj0168c	putative periplasmic protein	Uncategorized	-1.58158	0.0105363	-1.091	0.0998983				B	0	1	1	0	Chromatin structure and dynamics
CJJ81176_RS01000	Cj0198c	helicase-like protein	L	-1.54665	0.08143	-1.70433	0.0476793				Y	0	1	1	0	Nuclear structure
CJJ81176_RS01260	Cj0260c	small hydrophobic protein	Uncategorized	-1.68074	0.0535761	-1.48081	0.0869177				Z	0	1	1	0	Cytoskeleton
CJJ81176_RS01280	Cj0264c	molybdopterin containing oxidoreductase	C	-3.36586	1.8652e-18	-3.62353	2.80044e-21				W	0	1	1	0	Extracellular structures
CJJ81176_RS01285	Cj0265c	putative cytochrome C-type haem-binding periplasmic protein	C	-2.66104	3.05005e-08	-2.8934	1.09904e-09				X	0	1	1	0	Mobilome: prophages, transposons
CJJ81176_RS01370	cheW	chemotaxis protein	NT	-1.02186	0.0155866	-1.23213	0.00218905
CJJ81176_RS01375	cheA	chemotaxis histidine kinase	KNT	-0.924354	0.00537104	-1.21773	0.000103
CJJ81176_RS01530	fliG	flagellar motor switch protein	N	-1.1907	9.18866e-05	-1.35289	3.66832e-06
CJJ81176_RS01535	fliH	putative flagellar assembly protein	NU	-0.862675	0.0851957	-0.83063	0.092169
CJJ81176_RS01600	fdxA	ferredoxin	C	-2.90315	1.21172e-14	-2.80773	3.6133e-14
CJJ81176_RS01615	motB	putative flagellar motor protein	N	-0.74743	0.0384107	-0.745088	0.0373732
CJJ81176_RS01725	Cj0358	putative cytochrome C551 peroxidase	O	-1.39659	0.00158554	-1.53136	0.000398615
CJJ81176_RS01760	cmeB	inner membrane efflux transporter CmeB (multidrug efflux system CmeABC)	V	-1.31458	0.000851356	-1.16275	0.0037445
CJJ81176_RS01800	Cj0373	putative D-2-hydroxyacid dehydrogenase	CHR	-1.06456	0.0266468	-1.10158	0.0196112
CJJ81176_RS01845	ribH	6,7-dimethyl-8-ribityllumazine synthase	H	-1.1902	0.0263904	-1.08331	0.0449376
CJJ81176_RS01880	Cj0390	putative transmembrane protein	R	-0.862742	0.0348756	-0.764077	0.0671938
CJJ81176_RS01895	mqo	putative malate:quinone oxidoreductase	G	-1.75325	5.50098e-05	-1.76336	4.34207e-05
CJJ81176_RS01940	glyA	serine hydroxymethyltransferase	E	-1.22408	0.00517784	-1.11638	0.0121468
CJJ81176_RS01975	frdC	fumarate reductase cytochrome B subunit	Uncategorized	-1.85669	0.000624749	-1.92353	0.000333341
CJJ81176_RS01980	frdA	fumarate reductase flavoprotein subunit	C	-2.53281	1.00179e-07	-2.73405	6.01263e-09
CJJ81176_RS01985	frdB	fumarate reductase iron-sulfur protein	C	-2.4668	9.75216e-15	-2.38699	6.20471e-14
CJJ81176_RS02005	Cj0414	putative oxidoreductase subunit	Uncategorized	-5.25848	1.28357e-24	-5.59184	6.8433e-28
CJJ81176_RS02010	Cj0415	putative GMC oxidoreductase subunit	IR	-6.12567	3.745e-30	-6.26913	1.14032e-31
CJJ81176_RS02130	sdhA	succinate dehydrogenase flavoprotein subunit	C	-3.70437	1.1839e-09	-3.94472	6.17778e-11
CJJ81176_RS02135	sdhB	putative succinate dehydrogenase iron-sulfur protein	C	-4.53151	1.22461e-14	-4.707	6.75825e-16
CJJ81176_RS02140	sdhC	putative succinate dehydrogenase subunit C	C	-3.87108	3.58084e-10	-4.2917	1.76309e-12
CJJ81176_RS02175	Cj0448c	putative MCP-type signal transduction protein	NT	-2.24157	4.80971e-11	-2.2158	7.3711e-11
CJJ81176_RS02180	Cj0449c	conserved hypothetical protein Cj0449c	S	-1.56502	9.10648e-06	-1.43403	5.24873e-05
CJJ81176_RS02580	sucC	succinyl-coA synthetase beta chain	C	-1.49194	2.51142e-05	-1.56178	8.50643e-06
CJJ81176_RS02585	sucD	succinyl-coA synthetase alpha chain	C	-1.72486	1.93229e-09	-1.74505	1.09904e-09
CJJ81176_RS02590	oorD	OORD subunit of 2-oxoglutarate:acceptor oxidoreductase	F	-2.47479	9.92455e-12	-2.42321	2.20608e-11
CJJ81176_RS02595	oorA	OORA subunit of 2-oxoglutarate:acceptor oxidoreductase	C	-2.78936	2.87087e-14	-2.63859	7.42268e-13
CJJ81176_RS02600	oorB	OORB subunit of 2-oxoglutarate:acceptor oxidoreductase	C	-2.76546	2.65818e-16	-2.73855	4.73328e-16
CJJ81176_RS02605	oorC	OORC subunit of 2-oxoglutarate:acceptor oxidoreductase	C	-2.28894	1.52498e-05	-2.13422	6.08809e-05
CJJ81176_RS02665	Cj0550	hypothetical protein Cj0550	Uncategorized	-2.04529	0.000607747	-2.49574	1.24672e-05
CJJ81176_RS02680	Cj0553	putative integral membrane protein	S	-1.62375	0.000362405	-1.6918	0.000135294
CJJ81176_RS02685	Cj0554	hypothetical protein Cj0554	Uncategorized	-1.09632	0.0429243	-1.07974	0.0450763
CJJ81176_RS02690	Cj0555	putative dicarboxylate carrier protein MatC	P	-1.29948	0.0293634	-1.06775	0.082806
CJJ81176_RS02795	ilvI	acetolactate synthase large subunit	EH	-1.28689	0.00531871	-1.42325	0.00154468
CJJ81176_RS02840	Cj0583	hypothetical protein Cj0583	Uncategorized	-0.78875	0.0957006	-0.909369	0.0442266
CJJ81176_RS02910	fba	fructose-bisphosphate aldolase	G	-1.38747	0.000261993	-1.27795	0.000851203
CJJ81176_RS03105	ppa	inorganic pyrophosphatase	CP	-0.965243	0.0475955	-1.0137	0.0351166
CJJ81176_RS03115	aspS	aspartyl-tRNA synthetase	J	-0.778841	0.0414726	-0.835124	0.026661
CJJ81176_RS03180	Cj0653c	putative aminopeptidase	E	-1.31087	0.00109616	-1.26311	0.00153646
CJJ81176_RS03220	hslV	ATP-dependent protease HslV	O	-0.776892	0.094818	-0.900555	0.0449376
CJJ81176_RS03255	dcuB	anaerobic C4-dicarboxylate transporter	G	-3.4449	1.50259e-18	-3.28763	4.21664e-17
CJJ81176_RS03270	kdpB	potassium-transporting ATPase B chain	P	-0.918556	0.0178138	-0.748571	0.0614595
CJJ81176_RS03285	uvrB	excinuclease ABC subunit B	L	-1.36911	0.0189513	-1.13623	0.0560072
CJJ81176_RS03315	ispG	4-hydroxy-3-methylbut-2-en-1-yl diphosphate synthase	I	-0.919625	0.00208739	-0.770429	0.0113413
CJJ81176_RS03325	pta	putative phosphate acetyltransferase	C	-1.35273	0.00194611	-1.45047	0.000721167
CJJ81176_RS03330	ackA	acetate kinase	C	-1.6991	9.64671e-06	-1.82645	1.41181e-06
CJJ81176_RS03345	Cj0692c	putative membrane protein	Uncategorized	-2.07259	0.0192754	-1.88552	0.0301783
CJJ81176_RS03365	ftsZ	cell division protein FfsZ	D	-0.671858	0.032413	-0.72493	0.0182602
CJJ81176_RS03480	Cj0719c	conserved hypothetical protein Cj0719c	R	-1.84542	4.60257e-06	-1.91123	1.28273e-06
CJJ81176_RS03510	mogA	molybdopterin biosynthesis protein	H	-0.904147	0.062075	-0.867804	0.0751241
CJJ81176_RS03550	Cj0733	putative HAD-superfamily hydrolase	E	-2.63647	0.00571556	-1.92282	0.050067
CJJ81176_RS03560	Cj0735	putative periplasmic protein	Uncategorized	-4.27766	1.47267e-24	-3.89204	9.9062e-23
CJJ81176_RS03565	Cj0736	hypothetical protein Cj0736	Uncategorized	-4.20441	1.66624e-09	-4.21211	4.7006e-10
CJJ81176_RS03570		hemagglutination protein	U	-2.33087	0.0189513	-2.33956	0.0156078
CJJ81176_RS03670	aspB	aspartate aminotransferase	E	-1.44253	0.00233109	-1.43355	0.00245253
CJJ81176_RS03725	Cj0773c	putative binding-protein dependent transport system permease protein	E	-1.12629	0.00492287	-1.15561	0.00300448
CJJ81176_RS03760	napA	periplasmic nitrate reductase	C	-3.37208	2.18789e-08	-3.57834	2.06917e-09
CJJ81176_RS03765	napG	putative ferredoxin	CJ	-5.00462	7.35729e-27	-5.04607	7.35445e-28
CJJ81176_RS03770	napH	putative ferredoxin	C	-4.69312	7.18516e-23	-5.0841	5.75417e-27
CJJ81176_RS03775	napB	periplasmic nitrate reductase small subunit (cytochrome C-type protein)	CP	-4.12079	4.95351e-26	-4.21276	7.35445e-28
CJJ81176_RS03890	dapA	dihydrodipicolinate synthase	EM	-0.582845	0.0925437	-0.58818	0.0869177
CJJ81176_RS04000	Cj0832c	putative Na+/H+ antiporter family protein	C	-1.68645	0.00460338	-1.71563	0.00355787
CJJ81176_RS04005	Cj0833c	putative oxidoreductase	C	-1.56535	0.0108234	-1.70723	0.00410692
CJJ81176_RS04010	Cj0834c	ankyrin repeat-containing putative periplasmic protein	T	-1.54327	2.65776e-05	-1.58505	1.02927e-05
CJJ81176_RS04015	acnB	aconitate hydratase	C	-1.83348	9.57695e-06	-2.03819	5.60728e-07
CJJ81176_RS04100	Cj0852c	putative integral membrane protein	C	-1.71401	0.000460496	-1.86204	7.67393e-05
CJJ81176_RS04105	hemL	glutamate-1-semialdehyde 2,1-aminomutase	H	-1.54692	3.96846e-06	-1.61905	9.61593e-07
CJJ81176_RS04160		thiol:disulfide interchange protein DsbA	O	-2.09647	2.73364e-05	-2.17406	8.81717e-06
CJJ81176_RS04165	dsbB	putative disulphide oxidoreductase	O	-3.00447	1.2955e-08	-3.3654	8.43952e-11
CJJ81176_RS04170	Cj0866	aryl-sulfate sulfotransferase	Uncategorized	-3.60378	2.43958e-13	-3.60384	1.88044e-13
CJJ81176_RS04180		cytochrome c	C	-2.10426	9.49268e-08	-2.32312	1.6286e-09
CJJ81176_RS04185		cytochrome c	C	-1.65589	0.0017893	-1.83964	0.000373436
CJJ81176_RS04325	Cj0903c	putative amino-acid transport protein	E	-1.0046	0.000793556	-0.856078	0.00537111
CJJ81176_RS04350	Cj0909	putative periplasmic protein	P	-2.59196	9.92455e-12	-2.36782	2.75291e-10
CJJ81176_RS04355	Cj0910	putative periplasmic protein	Uncategorized	-2.88172	3.7504e-05	-2.74593	6.50305e-05
CJJ81176_RS04390	cstA	putative integral membrane protein (CstA homolog)	T	-1.88173	0.0125843	-1.89615	0.0113413
CJJ81176_RS04395	prsA	ribose-phosphate pyrophosphokinase	FE	-0.711503	0.050929	-0.751935	0.0364903
CJJ81176_RS04400	Cj0919c	putative ABC-type amino-acid transporter permease protein	E	-1.50365	1.03259e-06	-1.60141	1.05249e-07
CJJ81176_RS04405	Cj0920c	putative ABC-type amino-acid transporter permease protein	E	-2.02529	9.89571e-07	-2.15694	1.33429e-07
CJJ81176_RS04410	peb1A	aspartate/glutamate-binding ABC transporter protein	ET	-1.19641	0.0193915	-1.51683	0.00167617
CJJ81176_RS04415	pebC	ABC-type amino-acid transporter ATP-binding protein	E	-1.1459	0.0187642	-1.12098	0.0204737
CJJ81176_RS04455	Cj0930	putative GTP-binding protein	J	-0.7606	0.0315956	-0.780994	0.0240974
CJJ81176_RS04495		hypothetical protein	Uncategorized	-2.71611	0.00478384	-2.86036	0.00238562
CJJ81176_RS04510		hypothetical protein	Uncategorized	-1.92269	0.0325849	-2.15318	0.0131791
CJJ81176_RS04635		membrane protein	NT	-1.64983	0.000136214	-1.71334	5.02224e-05
CJJ81176_RS04810	hemN	oxygen-independent coproporphyrinogen III oxidase	H	-0.807671	0.0400005	-0.730648	0.0671938
CJJ81176_RS05080	thiG	thiazole biosynthesis protein ThiG	H	-0.985282	0.0127829	-0.973941	0.0118476
CJJ81176_RS05400	Cj1111c	putative MarC family integral membrane protein	E	-1.4778	0.00315784	-1.1966	0.0161394
CJJ81176_RS05495	gne	UDP-GlcNAc/Glc 4-epimerase	M	-1.01316	0.000960185	-0.913903	0.00311099
CJJ81176_RS05545		polyhydroxyalkanoate synthesis repressor PhaR	M	-1.81925	1.16509e-07	-1.51845	1.05688e-05
CJJ81176_RS05550		UDP-N-acetyl glucosamine 2-epimerase	M	-1.55022	0.000952915	-1.46185	0.00154468
CJJ81176_RS05555		beta-1,4-N-acetylgalactosaminyltransferase	M	-1.44912	0.0034496	-1.23962	0.0126117
CJJ81176_RS05655	Cj1165c	putative integral membrane protein	S	-1.91791	0.012923	-2.27564	0.00203367
CJJ81176_RS05750	petC	putative ubiquinol-cytochrome C reductase cytochrome C subunit	C	-2.09528	6.12529e-10	-2.21325	4.18226e-11
CJJ81176_RS05755	petB	putative ubiquinol-cytochrome C reductase cytochrome B subunit	C	-2.62816	4.85599e-18	-2.59206	1.08615e-17
CJJ81176_RS05760	petA	putative ubiquinol-cytochrome C reductase iron-sulfur subunit	C	-1.84845	7.12028e-07	-1.8695	4.45672e-07
CJJ81176_RS05790	dctA	putative C4-dicarboxylate transport protein	C	-2.16831	3.74893e-07	-2.17003	3.18275e-07
CJJ81176_RS05800	Cj1194	possible phosphate permease	P	-1.25644	0.000465843	-1.07718	0.0030678
CJJ81176_RS05850	atpB	ATP synthase F0 sector A subunit	C	-1.24868	0.00636522	-1.40769	0.00146082
CJJ81176_RS05930	groES	10 kD chaperonin (cpn10)	O	-1.60858	7.39367e-06	-1.42753	8.54659e-05
CJJ81176_RS05935	groEL	60 kD chaperonin (cpn60)	O	-1.49096	0.000992513	-1.50415	0.000874865
CJJ81176_RS06120	Cj1257c	putative efflux pump	G	-0.877112	0.0385599	-0.913083	0.0268799
CJJ81176_RS06130	porA	major outer membrane protein	Uncategorized	-1.50831	0.00109616	-1.55357	0.000721167
CJJ81176_RS06140	racR	two-component regulator	TK	-1.27346	0.0535761	-1.23118	0.0665229
CJJ81176_RS06155	hydD	putative hydrogenase maturation protease	C	-2.59254	9.62399e-10	-2.13	4.44311e-07
CJJ81176_RS06160	hydC	Ni/Fe-hydrogenase B-type cytochrome subunit	C	-2.39372	1.83111e-18	-2.3983	7.94652e-19
CJJ81176_RS06165	hydB	Ni/Fe-hydrogenase large subunit	C	-2.58177	2.97477e-21	-2.6667	9.9062e-23
CJJ81176_RS06170	hydA	Ni/Fe-hydrogenase small chain	C	-2.2274	1.1933e-13	-2.17132	4.7509e-13
CJJ81176_RS06295	accB	putative biotin carboxyl carrier protein of acetyl-CoA carboxylase	HI	-0.983047	0.0143174	-0.897812	0.0268015
CJJ81176_RS06415	pseI	Pse synthetase	M	-0.935365	0.021725	-0.740697	0.0745604
CJJ81176_RS06475	cdsA	phosphatidate cytidylyltransferase	R	-1.17653	0.000717758	-1.12557	0.000940997
CJJ81176_RS06535	Cj1356c	putative integral membrane protein	S	-2.52476	3.40475e-05	-2.45271	3.65318e-05
CJJ81176_RS06540	nrfA	putative periplasmic cytochrome C	P	-3.22095	4.18519e-09	-3.63566	1.69404e-11
CJJ81176_RS06545	nrfH	putative periplasmic cytochrome C	C	-3.69612	1.36204e-19	-4.05261	1.4714e-23
CJJ81176_RS06550	ppk	polyphosphate kinase	P	-1.29847	0.00184381	-1.14993	0.00657696
CJJ81176_RS06555	Cj1361c	hypothetical protein Cj1361c	T	-2.08619	0.054626	-1.9724	0.0751241
CJJ81176_RS06595		peptidase S8	OS	-0.669344	0.0770977	-0.75232	0.0404213
CJJ81176_RS06600	Cj1369	putative permease	F	-1.21647	0.00126134	-1.05838	0.0050125
CJJ81176_RS06725	hydA2	putative Ni/Fe-hydrogenase small subunit	C	-1.01723	0.0124002	-1.05408	0.00788783
CJJ81176_RS06740	pgk	phosphoglycerate kinase	G	-0.910868	0.0253419	-1.0339	0.00833793
CJJ81176_RS06860		membrane protein	M	-1.46416	0.0248568	-1.57791	0.0126237
CJJ81176_RS07040	Cj1468	putative integral membrane protein	S	-2.53916	6.19366e-07	-1.8544	0.000284391
CJJ81176_RS07070	Cj1475c	hypothetical protein Cj1475c	Uncategorized	-2.64147	5.04058e-05	-2.99229	2.36078e-06
CJJ81176_RS07075	Cj1476c	pyruvate-flavodoxin oxidoreductase	C	-1.86924	3.96299e-08	-1.8966	2.23792e-08
CJJ81176_RS07115	Cj1484c	putative membrane protein	Uncategorized	-0.950195	0.0351819	-1.05285	0.0155465
CJJ81176_RS07120	Cj1485c	putative periplasmic protein	Uncategorized	-1.66796	0.00155445	-1.9471	0.000116054
CJJ81176_RS07125	Cj1486c	putative periplasmic protein	Uncategorized	-1.37565	0.000372522	-1.58114	2.16584e-05
CJJ81176_RS07130	ccoP	cb-type cytochrome C oxidase subunit III	C	-1.31666	0.000754467	-1.64798	1.05688e-05
CJJ81176_RS07140	ccoO	cb-type cytochrome C oxidase subunit II	C	-1.71428	1.00998e-08	-2.03427	3.85402e-12
CJJ81176_RS07145	ccoN	cb-type cytochrome C oxidase subunit I	C	-2.04756	2.64648e-13	-2.1423	1.55189e-14
CJJ81176_RS07200	Cj1501	conserved hypothetical protein Cj1501	O	-1.75459	0.00152861	-2.31959	1.10736e-05
CJJ81176_RS07205	putP	putative sodium/proline symporter	E	-2.44422	4.94187e-18	-2.39052	1.96195e-17
CJJ81176_RS07210	putA	putative proline dehydrogenase/delta-1-pyrroline-5-carboxylate dehydrogenase	CE	-1.26657	0.000537557	-1.27935	0.000412288
CJJ81176_RS07215	selD	putative selenide,water dikinase	E	-1.61251	0.000769177	-1.55628	0.000910163
CJJ81176_RS07240	fdhC	putative formate dehydrogenase, cytochrom B subunit	C	-2.70502	1.71824e-17	-2.85755	7.52472e-20
CJJ81176_RS07245	fdhB	putative formate dehydrogenase iron-sulfur subunit	C	-2.84144	8.97221e-12	-3.07139	6.58313e-14
CJJ81176_RS07250	fdhA	putative formate dehydrogenase large subunit (Selenocysteine containing)	CR	-2.61208	5.72269e-10	-2.83965	9.36824e-12
CJJ81176_RS07255		formate dehydrogenase	CR	-1.90037	0.000148432	-2.38438	6.8829e-07
CJJ81176_RS07365	Cj1541	conserved hypothetical protein Cj1541	R	-1.18472	0.0193915	-0.923547	0.0777364
CJJ81176_RS07370	Cj1542	putative allophanate hydrolase subunit 1	E	-1.98068	0.00115114	-1.68369	0.00593491
CJJ81176_RS07375	Cj1543	putative allophanate hydrolase subunit 2	E	-1.13424	0.062075	-1.33777	0.0209331
CJJ81176_RS07380	Cj1544c	putative integral membrane protein	GER	-1.32776	0.0193915	-1.0248	0.0751551
CJJ81176_RS07400	Cj1548c	putative NADP-dependent alcohol dehydrogenase	G	-0.985098	0.0143132	-0.767966	0.0692609
CJJ81176_RS07425	hsdM	putative type I restriction enzyme M protein	V	-0.949463	0.0246275	-0.891677	0.0342588
CJJ81176_RS07470	nuoN	NADH dehydrogenase I chain N	C	-2.68808	4.42693e-08	-2.64651	5.76731e-08
CJJ81176_RS07475	nuoM	NADH dehydrogenase I chain M	C	-2.20565	7.87946e-11	-2.11301	3.42332e-10
CJJ81176_RS07480	nuoL	NADH dehydrogenase I chain L	CP	-2.98757	3.10763e-09	-2.8565	1.44842e-08
CJJ81176_RS07485	nuoK	NADH dehydrogenase I chain K	C	-2.89528	3.96846e-06	-2.94533	1.98168e-06
CJJ81176_RS07490	nuoJ	NADH dehydrogenase I chain J	C	-1.50451	9.54117e-05	-1.56636	3.22113e-05
CJJ81176_RS07495	nuoI	NADH dehydrogenase I chain I	C	-1.99857	5.26325e-10	-1.92045	1.58043e-09
CJJ81176_RS07500	nuoH	NADH dehydrogenase I chain H	C	-2.48672	1.76302e-22	-2.35467	3.81206e-21
CJJ81176_RS07505	nuoG	putative NADH dehydrogenase I chain G	CR	-1.96022	2.07935e-15	-1.75161	1.15421e-12
CJJ81176_RS07520	nuoD	NADH dehydrogenase I chain D	C	-2.05455	9.19944e-07	-2.03458	1.09331e-06
CJJ81176_RS07525	nuoC	NADH dehydrogenase I chain C	C	-0.858908	0.0828179	-0.972959	0.0433694
CJJ81176_RS07530	nuoB	NADH dehydrogenase I chain B	C	-2.02	4.90025e-06	-2.08012	1.98168e-06
CJJ81176_RS07535	nuoA	NADH dehydrogenase I chain A	C	-0.891431	0.0414726	-0.897887	0.0379194
CJJ81176_RS07690	ispDF	2-C-methyl-D-erythritol 4-phosphate cytidylyltransferase/ 2-C-methyl-D-erythritol 2,4-cyclodiphosphate synthase	I	-0.976235	0.000392364	-0.983383	0.000255513
CJJ81176_RS07700	Cj1609	putative sulfate adenylyltransferase	P	-1.12152	0.000844737	-0.928983	0.00670733
CJJ81176_RS07750	kgtP	alpha-ketoglutarate permease	GEPR	-1.90236	4.03842e-07	-1.67268	1.05688e-05
CJJ81176_RS07795	sdaA	L-serine dehydratase	E	-2.44417	8.95612e-20	-2.49536	8.26017e-21
CJJ81176_RS07800	sdaC	amino acid transporter	E	-1.6886	8.29562e-06	-1.61938	2.02532e-05
CJJ81176_RS07890	Cj1643	putative periplasmic protein	O	-0.61547	0.0630863	-0.766919	0.0137514
CJJ81176_RS07940	Cj1653c	putative lipoprotein	M	-1.37864	0.0285443	-1.39135	0.0222736
CJJ81176_RS07945		Na+/H+ antiporter NhaA 1	CP	-0.97748	0.0855441	-0.987582	0.0799398
CJJ81176_RS08055	eno	enolase	G	-1.24141	0.000814165	-1.34891	0.000202408
CJJ81176_RS08085	cysQ	CysQ protein homolog	P	-1.49714	0.000465843	-1.33073	0.00147365
CJJ81176_RS08090	gltA	citrate synthase	C	-2.72234	2.18816e-08	-2.86213	2.95743e-09
CJJ81176_RS08125		transporter	G	-1.53608	0.0107201	-1.561	0.0079518
CJJ81176_RS08310	leuA	2-isopropylmalate synthase	E	-0.95169	0.0884493	-0.921485	0.0990145
CJJ81176_RS08350	flgE	flagellar hook subunit protein	N	-0.787601	0.0345308	-0.877346	0.0155465

## Sheet: All data
			2.5 hours				4 hours
81-176 gene	NCTC homolog	Annotation	log2FC(INT 407 / MH)	FDR INT / MH	log2FC(Caco-2 / MH)	FDR Caco-2 / MH	log2FC(INT 407 / MH)	FDR INT / MH	log2FC(Caco-2 / MH)	FDR Caco-2 / MH
CJJ81176_RS00005	Cj0001	chromosomal replication initiator protein	-1.12681	0.137737	-0.836862	0.232799	-1.01907	0.170948	-1.06241	0.143097
CJJ81176_RS00010	Cj0002	DNA polymerase III, beta chain	-1.29526	0.00631149	-0.191057	0.718735	0.450174	0.406285	0.498533	0.343033
CJJ81176_RS00015	Cj0003	DNA gyrase subunit B	0.0109954	0.997681	-0.630618	0.0673983	-0.507384	0.193509	-0.575011	0.123422
CJJ81176_RS00020	Cj0004c	monohaem cytochrome C	0.910352	0.130041	-0.299384	0.633051	0.50444	0.424448	0.503037	0.416106
CJJ81176_RS00025	Cj0005c	molydopterin containing oxidoreductase	-0.0327097	0.985589	-0.703771	0.120558	0.180471	0.758241	0.130961	0.837381
CJJ81176_RS00030	Cj0006	putative Na+/H+ antiporter family protein	0.190978	0.822681	-0.0952724	0.881672	-0.164435	0.799998	-0.159854	0.816687
CJJ81176_RS00035	Cj0007	glutamate synthase (NADPH) large subunit	-3.14218	4.26118e-09	-3.79642	8.59749e-14	-0.695528	0.313277	-0.572505	0.420169
CJJ81176_RS00040	n/a	hypothetical protein	-2.33711	0.00194111	-3.17778	4.69719e-06	-0.112636	0.92148	-0.167209	0.886201
CJJ81176_RS00045	Cj0009	glutamate synthase (NADPH) small subunit	-1.70443	0.0111987	-3.82158	8.6931e-11	-1.03887	0.162303	-1.02736	0.165331
CJJ81176_RS00050	Cj0010c	ribonuclease HII	0.947234	0.075618	-0.0964028	0.881672	-0.432097	0.480812	-0.389917	0.523084
CJJ81176_RS00055	Cj0011c	putative non-specific DNA binding protein. Functional classification-Synthesis and modification of macromolecules-DNA replication,restriction/modification, recombination and repair	-1.88962	0.0840423	-2.0094	0.0471047	-1.43838	0.218995	-1.33333	0.257493
CJJ81176_RS00060	Cj0012c	non-haem iron protein	-1.59779	0.0428346	-3.83691	6.90922e-09	-2.5283	0.000412372	-2.83612	4.63816e-05
CJJ81176_RS00065	Cj0013	dihydroxy-acid dehydratase	-0.468063	0.246561	-1.70013	2.52508e-08	-0.633668	0.0771654	-0.825124	0.0138829
CJJ81176_RS00070	n/a	membrane protein	-1.13053	0.0308859	-1.37498	0.00200624	-0.77637	0.131459	-0.849786	0.0877253
CJJ81176_RS00075	Cj0015c	hypothetical protein Cj0015c	-1.26151	0.0469391	-0.229023	0.713517	0.416215	0.515732	0.54888	0.370095
CJJ81176_RS00080	Cj0016	putative transcriptional regulatory protein	0.234666	0.78815	0.244074	0.701886	0.275889	0.693669	0.266154	0.70854
CJJ81176_RS00085	Cj0017c	disulphide bond formation protein	2.06388	3.10616e-05	2.71469	6.19448e-09	2.00313	5.16562e-05	2.00422	4.6696e-05
CJJ81176_RS00090	Cj0018c	disulphide bond formation protein	1.06207	0.129051	4.36272	2.40457e-20	3.33428	6.86163e-12	3.56528	1.0127e-13
CJJ81176_RS00095	Cj0019c	putative MCP-domain signal transduction protein	0.271084	0.732503	-0.573526	0.317194	-0.496511	0.444377	-0.425136	0.524472
CJJ81176_RS00100	Cj0020c	cytochrome C551 peroxidase	-0.200887	0.796306	-0.320232	0.567782	-0.648472	0.253209	-0.522837	0.370095
CJJ81176_RS00105	Cj0021c	putative fumarylacetoacetate (FAA) hydrolase family protein	-1.43659	0.00117503	-2.08523	7.75946e-08	-1.45727	0.000318921	-1.35023	0.00074662
CJJ81176_RS00110	Cj0022c	putative ribosomal pseudouridine synthase	0.305315	0.819085	-0.21924	0.822941	-0.574903	0.550139	-0.976491	0.28051
CJJ81176_RS00115	Cj0023	adenylosuccinate lyase	0.391597	0.413488	0.971439	0.0044328	0.980157	0.00594808	0.767064	0.0405806
CJJ81176_RS00120	Cj0024	ribonucleoside-diphosphate reductase alpha chain	1.30859	0.000140023	0.858676	0.0132562	0.530714	0.197498	0.457499	0.272204
CJJ81176_RS00125	Cj0025c	putative sodium:dicarboxylate family transmembrane symporter	1.06996	0.129822	1.48652	0.0116904	0.988693	0.151617	0.633742	0.395971
CJJ81176_RS00130	Cj0026c	thymidylate synthase	-1.44161	0.00357904	-0.934399	0.0409516	-0.264212	0.645993	-0.313183	0.589023
CJJ81176_RS00135	Cj0027	CTP synthase	-0.24564	0.724161	-0.216167	0.691797	0.221326	0.715742	0.0694616	0.926625
CJJ81176_RS00140	Cj0028	putative single-stranded-DNA-specific exonuclease	-0.385436	0.377344	-0.463049	0.185938	-0.259469	0.527002	-0.263128	0.520734
CJJ81176_RS00145	Cj0029	cytoplasmic L-asparaginase	-2.79523	2.41715e-08	-3.15631	5.83254e-11	-2.54816	3.16668e-07	-2.90223	2.95743e-09
CJJ81176_RS00175	n/a	cytochrome c	-2.64339	0.000902622	-3.06606	4.92629e-05	-3.47708	4.39123e-06	-3.82127	2.98189e-07
CJJ81176_RS00180	n/a	membrane protein	-0.976618	0.31126	-1.79621	0.0240457	-2.76566	0.000372522	-3.45329	3.55348e-06
CJJ81176_RS00185	n/a	thioredoxin	-0.810865	0.528413	-2.27479	0.0171074	-2.23021	0.0274941	-3.09123	0.00110149
CJJ81176_RS00190	n/a	cytochrome c biogenesis protein	-0.83247	0.413488	-2.26812	0.0037136	-1.70211	0.0480879	-1.58588	0.0688777
CJJ81176_RS00195	n/a	gamma-glutamyltranspeptidase	-2.61042	4.05381e-05	-3.99395	1.65125e-11	-1.63405	0.0193915	-1.84223	0.00646909
CJJ81176_RS00200	n/a	type II restriction endonuclease	-0.850972	0.0870378	-1.02498	0.0136248	-0.379378	0.469153	-0.272663	0.61218
CJJ81176_RS00205	n/a	hypothetical protein	0.138163	0.952061	-0.468761	0.676566	-0.0296483	0.980269	-0.180317	0.900084
CJJ81176_RS00210	n/a	transglycosylase	0.744138	0.312442	1.23805	0.0210094	1.30888	0.0193171	1.77	0.000465823
CJJ81176_RS00215	n/a	membrane protein	2.12686	0.0029409	0.485069	0.567393	0.265511	0.78812	0.435432	0.643164
CJJ81176_RS00220	Cj0034c	putative periplasmic protein	0.213113	0.754617	-0.642787	0.168666	-0.0594864	0.932308	-0.375023	0.49376
CJJ81176_RS00225	Cj0035c	putative efflux protein	0.278074	0.765968	0.0649766	0.934844	0.501563	0.480812	0.30439	0.688713
CJJ81176_RS00230	Cj0036	hypothetical protein Cj0036	-0.12053	0.931422	-0.288295	0.706453	0.0386243	0.971137	0.126987	0.897477
CJJ81176_RS00235	Cj0037c	putative cytochrome C	0.0267307	0.994794	-1.0694	0.146379	0.760157	0.369776	0.274026	0.780656
CJJ81176_RS00240	Cj0038c	putative poly(A) polymerase family protein	1.52677	0.086706	1.99449	0.00572513	0.585402	0.550139	0.769418	0.415027
CJJ81176_RS00245	Cj0039c	GTP-binding protein TypA homolog	2.00508	6.29467e-10	1.49492	3.61724e-06	0.788936	0.034807	0.757887	0.0442266
CJJ81176_RS00250	Cj0040	hypothetical protein Cj0040	-0.0902763	0.972904	0.832447	0.324543	1.977	0.0094857	0.901826	0.3188
CJJ81176_RS00255	Cj0041	putative flagellar hook-length control protein	0.162371	0.840048	0.613401	0.182296	0.377498	0.486585	0.21601	0.710269
CJJ81176_RS00260	Cj0042	putative flagellar hook assembly protein	-0.604129	0.202323	-1.37877	0.000280442	-0.361696	0.473231	-0.448174	0.355464
CJJ81176_RS00265	Cj0043	flagellar hook protein	-0.674377	0.0782656	-0.698593	0.0402881	-0.396948	0.328355	-0.376315	0.355372
CJJ81176_RS00270	Cj0044c	hypothetical protein Cj0044c	0.890786	0.496265	1.2286	0.235118	-0.170482	0.910475	-0.150838	0.926625
CJJ81176_RS00285	n/a	2-oxoglutarate translocator	0.710064	0.526953	0.657174	0.531035	0.396441	NA	0	1
CJJ81176_RS00290	n/a	C4-dicarboxylate ABC transporter	0	NA	0	NA	0	NA	0.106263	NA
CJJ81176_RS00295	n/a	2-oxoglutarate translocator	0	NA	0.249796	NA	0	NA	0	NA
CJJ81176_RS00300	n/a	2-oxoglutarate translocator	1.72186	0.108634	-0.209023	0.874972	-0.856738	0.489306	-1.22952	0.298958
CJJ81176_RS00305	Cj0053c	tRNA (5-methylaminomethyl-2-thiouridylate)-methyltransferase	0.659232	0.246561	0.491745	0.340898	0.338402	0.568417	0.515732	0.363732
CJJ81176_RS00310	Cj0054c	putative lysine decarboxylase family protein	0.0171979	0.997681	0.751825	0.169681	0.530853	0.406929	0.727121	0.221233
CJJ81176_RS00315	Cj0055c	conserved hypothetical protein Cj0055c	-0.410079	0.580877	0.954476	0.0506512	0.260243	0.683137	0.334286	0.596069
CJJ81176_RS00320	Cj0056c	hypothetical protein Cj0056c	0.22573	0.832911	0.74961	0.274016	0.823401	0.266183	0.90066	0.216113
CJJ81176_RS00325	Cj0057	putative periplasmic protein	-0.197118	0.919067	-0.18756	0.876113	-0.369516	0.758913	0.425735	0.710025
CJJ81176_RS00335	Cj0059c	putative flagellar motor switch protein	-0.616516	0.129861	-0.426865	0.240542	-0.757146	0.0329769	-0.73233	0.0375215
CJJ81176_RS00340	Cj0060c	flagellar motor switch protein	0.295108	0.714366	-0.15296	0.821468	-0.728306	0.238201	-0.781058	0.193
CJJ81176_RS00345	Cj0061c	RNA polymerase sigma factor for flagellar operon	-0.0501058	0.977386	-0.402355	0.483069	-0.721756	0.227444	-0.384388	0.551992
CJJ81176_RS00350	Cj0062c	putative integral membrane protein	0.619554	0.391326	-0.00898456	0.990818	-0.264514	0.729887	-0.2597	0.733822
CJJ81176_RS00355	Cj0063c	putative ATP-binding protein	-0.583268	0.254056	-0.5123	0.228079	-0.713248	0.0990977	-0.462172	0.315078
CJJ81176_RS00360	Cj0064c	flagellar biosynthesis protein	-1.09481	0.0499545	-1.33216	0.00646595	-1.16318	0.02804	-0.996665	0.0671938
CJJ81176_RS00365	Cj0065c	putative 2-amino-4-hydroxy-6-hydroxymethyldihydropteridine pyrophosphokinase	-0.408058	0.625248	-0.00775669	0.990818	0.352442	0.583312	-0.132216	0.86416
CJJ81176_RS00370	Cj0066c	3-dehydroquinate dehydratase	-1.16028	0.147217	-2.03776	0.00259946	-1.46225	0.0535761	-1.42423	0.0649111
CJJ81176_RS00375	Cj0067	putative amidohydrolase family protein	1.02556	0.126277	1.9131	0.00024126	1.30338	0.0271126	1.4681	0.00910945
CJJ81176_RS00380	Cj0068	protease	1.10435	0.188374	2.09247	0.000674604	2.32785	0.000164762	2.23194	0.000282312
CJJ81176_RS00385	Cj0069	hypothetical protein Cj0069	-1.12073	0.218273	-0.965005	0.252419	-0.36619	0.726243	-0.786726	0.413948
CJJ81176_RS00390	Cj0070c	hypothetical protein Cj0070c	0.848222	0.502676	-2.02952	0.0451948	-1.99948	0.0617198	-1.46377	0.186636
CJJ81176_RS00395	n/a	cation-binding protein	0.263924	0.860882	-0.123461	0.922696	-0.5286	NA	-0.202451	0.888706
CJJ81176_RS00400	n/a	methyl-accepting chemotaxis protein	-1.00259	0.428777	-1.49465	0.177216	-1.23413	0.328355	-2.06235	0.0687572
CJJ81176_RS00405	Cj0073c	conserved hypothetical protein Cj0073c	-1.75779	2.9881e-07	-3.75243	2.4762e-30	-3.41251	5.33535e-26	-3.61646	1.22858e-29
CJJ81176_RS00410	Cj0074c	putative iron-sulfur protein	-1.7163	4.15822e-11	-4.25393	7.84228e-66	-3.68705	1.31673e-50	-3.97613	1.29061e-59
CJJ81176_RS00415	Cj0075c	putative oxidoreductase iron-sulfur subunit	-1.76352	8.54182e-10	-3.8499	1.95088e-44	-3.14186	8.1629e-31	-3.50367	1.09687e-38
CJJ81176_RS00420	Cj0076c	L-lactate permease	-1.53631	0.00285801	-3.47683	2.14861e-14	-2.48977	1.37343e-07	-2.5553	5.52363e-08
CJJ81176_RS00425	Cj0077c	cytolethal distending toxin C	-1.02179	0.0911315	-0.421242	0.410588	-0.523159	0.342181	-0.511421	0.342921
CJJ81176_RS00430	Cj0078c	cytolethal distending toxin B	-0.933551	0.0123838	-1.26349	6.54928e-05	-1.22751	0.000152752	-1.30961	2.95727e-05
CJJ81176_RS00435	Cj0079c	cytolethal distending toxin A	-0.740874	0.270354	-0.614545	0.307322	-0.592157	0.380184	-0.5438	0.420169
CJJ81176_RS00440	Cj0080	putative membrane protein. Functional classification-Membranes, lipoproteins and porins	0.577386	0.570046	0.268238	0.793821	0	NA	0.14089	0.914693
CJJ81176_RS00445	Cj0081	cytochrome bd oxidase subunit I	0.495677	0.550162	0.509926	0.457558	-0.817852	0.258151	-0.791725	0.272204
CJJ81176_RS00450	Cj0082	cytochrome bd oxidase subunit II	0.0173826	0.997681	0.531591	0.330145	-0.490166	0.438735	-0.737228	0.205897
CJJ81176_RS00455	n/a	hypothetical protein	0.290239	0.86585	-0.306444	0.803625	-1.60559	0.145763	-1.23682	0.272703
CJJ81176_RS00460	Cj0085c	putative amino acid recemase	-0.852852	0.316052	-0.623632	0.367351	0.435345	0.561322	0.341728	0.66376
CJJ81176_RS00465	Cj0086c	uracil-DNA glycosylase	-1.33204	0.0993484	-0.99117	0.122327	-0.34312	0.647343	-0.346574	0.646134
CJJ81176_RS00470	Cj0087	aspartate ammonia-lyase	-0.845787	0.23394	-1.36901	0.0234547	-2.27585	7.86349e-05	-2.40077	2.40855e-05
CJJ81176_RS00475	Cj0088	anaerobic C4-dicarboxylate transporter	-0.712146	0.188374	-2.16919	3.59595e-07	-3.4003	1.56337e-16	-3.29995	1.2867e-15
CJJ81176_RS00480	Cj0089	putative lipoprotein	0.276121	0.667141	-0.231354	0.647105	-0.339311	0.527002	-0.650305	0.176393
CJJ81176_RS00485	Cj0090	putative lipoprotein	-0.0741503	0.968966	0.100105	0.902656	-0.0288887	0.976233	-0.565899	0.449328
CJJ81176_RS00490	Cj0091	putative lipoprotein	0.580279	0.361686	0.036791	0.957638	0.239602	0.730948	0.0187836	0.985896
CJJ81176_RS00495	Cj0092	putative periplasmic protein	-0.0615835	0.970847	-0.00598178	0.992338	-0.0213237	0.980269	-0.283914	0.70854
CJJ81176_RS00500	Cj0093	putative periplasmic protein	0.445998	0.505615	0.231757	0.699719	-0.0241051	0.976233	-0.258563	0.702297
CJJ81176_RS00505	Cj0094	50S ribosomal protein L21	1.53734	1.49202e-05	0.670527	0.0848413	0.57119	0.19033	0.326773	0.49376
CJJ81176_RS00510	Cj0095	50S ribosomal protein L27	1.0478	0.0273427	0.371553	0.467439	0.21457	0.725624	0.440491	0.43052
CJJ81176_RS00515	Cj0096	GTP-binding protein	1.22975	0.0149066	0.553129	0.289544	-0.439145	0.480812	-0.846491	0.121135
CJJ81176_RS00520	Cj0097	glutamate 5-kinase	0.0537877	0.97393	-0.0602183	0.931183	-0.199418	0.763377	-0.30684	0.634709
CJJ81176_RS00525	Cj0098	methionyl-tRNA formyltransferase	1.05216	0.12596	1.10202	0.0572138	0.645698	0.355313	0.44981	0.538425
CJJ81176_RS00530	Cj0099	putative biotin--[acetyl-CoA-carboxylase] synthetase	0.762019	0.30484	1.90719	0.000201658	1.95	0.00020479	1.90396	0.000250164
CJJ81176_RS00535	Cj0100	parA family protein	-0.375408	0.452856	-0.162249	0.718735	-0.342783	0.467666	-0.34772	0.45347
CJJ81176_RS00540	Cj0101	parB family protein	-0.874086	0.185222	-0.148091	0.821016	-0.305931	0.634912	0.0496087	0.954023
CJJ81176_RS00545	Cj0102	ATP synthase F0 sector B' subunit	0.0393265	0.970847	-0.144348	0.742537	0.181949	0.697932	0.105594	0.840637
CJJ81176_RS00550	Cj0103	ATP synthase F0 sector B subunit	-0.177089	0.859773	0.353768	0.570443	0.226434	0.758638	0.327596	0.643164
CJJ81176_RS00555	Cj0104	ATP synthase F1 sector delta subunit	0.0517936	0.983652	-0.0509914	0.951284	-0.422454	0.589133	-0.429481	0.589023
CJJ81176_RS00560	Cj0105	ATP synthase F1 sector alpha subunit	0.426011	0.121792	0.0738294	0.815667	-0.596727	0.0192377	-0.61235	0.0138597
CJJ81176_RS00565	Cj0106	ATP synthase F1 sector gamma subunit	0.399868	0.38317	1.35013	2.07206e-05	0.903252	0.0108028	0.932232	0.00708307
CJJ81176_RS00570	Cj0107	ATP synthase F1 sector beta subunit	0.657324	0.0263998	-0.232675	0.466629	-0.651699	0.0282061	-0.630362	0.0344207
CJJ81176_RS00575	Cj0108	ATP synthase F1 sector epsilon subunit	0.83102	0.0782656	0.151044	0.780798	-0.358337	0.505378	-0.416074	0.43052
CJJ81176_RS00580	Cj0109	putative MotA/TolQ/ExbB proton channel family protein	0.616317	0.125058	0.440558	0.23278	-0.634566	0.101685	-0.541795	0.167749
CJJ81176_RS00585	Cj0110	putative exbD/tolR family transport protein	0.749337	0.326462	0.935862	0.139477	-0.352232	0.662689	-0.54343	0.482812
CJJ81176_RS00590	Cj0111	putative periplasmic protein	1.72273	0.00111446	2.23746	1.59817e-06	1.14454	0.038195	0.968739	0.0877253
CJJ81176_RS00595	Cj0112	putative TolB precursor protein	0.170135	0.714366	0.427631	0.173939	0.354349	0.318857	0.34516	0.328441
CJJ81176_RS00600	Cj0113	peptidoglycan associated lipoprotein (omp18)	-0.114894	0.848241	-0.848401	0.0113505	-0.332083	0.435929	-0.325208	0.446356
CJJ81176_RS00605	Cj0114	putative periplasmic protein	0.104447	0.907595	0.776332	0.103424	0.318205	0.584423	0.187294	0.77255
CJJ81176_RS00610	Cj0115	FKBP-type peptidyl-prolyl cis-trans isomerase	0.9157	0.0604634	-0.408335	0.421138	-0.728494	0.15863	-0.587952	0.27094
CJJ81176_RS00615	Cj0116	malonyl CoA-acyl carrier protein transacylase	1.44459	0.00161104	0.493131	0.334657	-0.396717	0.498918	-0.249617	0.694213
CJJ81176_RS00620	Cj0117	5'-methylthioadenosine/S-adenosylhomocysteine nucleosidase	1.15704	0.00853334	0.490063	0.296583	-0.31466	0.566573	-0.141123	0.827076
CJJ81176_RS00625	Cj0118	conserved hypothetical protein Cj0118	1.27344	0.0164241	0.637586	0.248029	-0.279523	0.678946	0.0866605	0.916583
CJJ81176_RS00630	Cj0119	putative hydrolase	0.385172	0.760894	1.09173	0.184019	0.2899	0.783028	0.642007	0.512078
CJJ81176_RS00635	Cj0120	hypothetical protein Cj0120	1.86531	0.0702618	2.31045	0.00780485	1.79407	0.0650951	1.41437	0.167918
CJJ81176_RS00640	Cj0121	conserved hypothetical protein Cj0121	2.59109	0.000320692	2.12115	0.00239338	0.661837	0.485122	0.763037	0.40776
CJJ81176_RS00645	n/a	hypothetical protein	-0.641099	0.242563	-1.73012	4.07638e-05	-0.820528	0.0849764	-0.904414	0.050067
CJJ81176_RS00650	Cj0123c	putative tRNA-dihydrouridine synthase	1.16182	0.0682716	0.893785	0.132445	0.0253594	0.977861	-0.0828799	0.928191
CJJ81176_RS00655	Cj0124c	putative membrane protein	0.68249	0.30484	1.16985	0.0233788	0.52283	0.422893	0.570081	0.367466
CJJ81176_RS00660	Cj0125c	hypothetical protein Cj0125c	0.107733	0.944241	0.627317	0.385832	-0.331535	0.705952	-0.382589	0.660716
CJJ81176_RS00665	Cj0126c	conserved hypothetical protein Cj0126c	0.229676	0.854653	0.975055	0.133859	0.344164	0.675515	0.472508	0.553409
CJJ81176_RS00670	Cj0127c	acetyl-coenzyme A carboxylase carboxyl transferase subunit beta	-0.619179	0.306588	-0.26419	0.646331	-0.477249	0.428572	-0.469825	0.43052
CJJ81176_RS00675	Cj0128c	putative inositol monophosphatase family protein	1.45375	0.0785686	1.30589	0.0776151	0.320474	0.751397	-0.000180862	1
CJJ81176_RS00680	Cj0129c	outer membrane protein	1.14133	0.00438006	0.875358	0.0263862	0.525082	0.262787	0.794393	0.0649356
CJJ81176_RS00685	Cj0130	putative prephenate dehydrogenase	-0.0731154	0.95776	0.658333	0.212392	0.792008	0.152694	0.52286	0.376427
CJJ81176_RS00690	Cj0131	putative peptidase M23 family protein	-0.433445	0.323847	0.0011232	0.998108	0.0252203	0.964614	0.239716	0.590061
CJJ81176_RS00695	Cj0132	UDP-3-O-[3-hydroxymyristoyl] n-acetylglucosamine deacetylase	0.115537	0.857197	0.256146	0.493591	0.0401386	0.938789	0.29861	0.461353
CJJ81176_RS00700	Cj0133	putative glycoprotease family protein	1.23745	0.227336	2.25923	0.00256612	1.37461	0.124584	1.50544	0.0805252
CJJ81176_RS00705	Cj0134	putative homoserine kinase	1.07995	0.159963	1.61537	0.00897193	0.843821	0.266685	0.58987	0.462992
CJJ81176_RS00710	Cj0135	conserved hypothetical protein Cj0135	0.709234	0.591413	2.34655	0.00298827	1.88173	0.0316108	2.61385	0.000940997
CJJ81176_RS00715	Cj0136	translation initiation factor IF-2	0.948155	0.0204402	-0.0938147	0.854799	0.0295968	0.963738	-0.0374235	0.956822
CJJ81176_RS00720	Cj0137	putative ribosome-binding factor A	1.00477	0.185676	0.730876	0.2815	0.870455	0.228461	0.486305	0.537203
CJJ81176_RS00725	Cj0138	conserved hypothetical protein Cj0138	0.737084	0.418385	1.0295	0.145532	0.69538	0.406285	0.510484	0.555606
CJJ81176_RS00730	n/a	ATPase AAA	0.687459	0.345432	0.939902	0.109707	0.92293	0.148844	1.0894	0.0726688
CJJ81176_RS00740	Cj0141c	putative ABC transporter integral membrane protein	0.0918459	0.953737	-0.161551	0.845378	-0.920164	0.221679	-0.671954	0.389598
CJJ81176_RS00745	Cj0142c	putative ABC transporter ATP-binding protein	0.834816	0.340014	0.477696	0.565935	-0.320533	0.74613	0.0166047	0.995084
CJJ81176_RS00750	Cj0143c	putative periplasmic solute binding protein for ABC transport system	-0.0244096	0.990378	0.909575	0.00737379	1.00038	0.00407574	1.23007	0.000179742
CJJ81176_RS00755	Cj0144	putative methyl-accepting chemotaxis signal transduction protein	-0.552131	0.278739	-0.309308	0.525091	-0.237004	0.667666	-0.278899	0.614371
CJJ81176_RS00760	Cj0145	putative TAT (Twin-Arginine Translocation) pathway signal sequence domain protein	0.967205	0.0785686	0.0328077	0.960262	-0.653402	0.273281	-0.890647	0.106455
CJJ81176_RS00765	Cj0146c	thioredoxin reductase	0.610182	0.316052	1.47489	0.00200379	2.74301	9.92063e-10	2.69429	1.98747e-09
CJJ81176_RS00770	Cj0147c	thioredoxin	-0.342954	0.534123	0.207428	0.669038	1.12391	0.00531871	1.30174	0.000847973
CJJ81176_RS00775	Cj0148c	conserved hypothetical protein Cj0148c	-0.245838	0.897695	0.337648	0.770203	0.219212	0.870927	0.58826	0.615124
CJJ81176_RS00780	Cj0149c	homoserine dehydrogenase	0.480658	0.497082	0.690166	0.217897	0.5712	0.367147	0.483305	0.45347
CJJ81176_RS00785	Cj0150c	aminotransferase	0.189948	0.690944	-0.260046	0.457431	-0.120843	0.766824	-0.160929	0.694213
CJJ81176_RS00790	Cj0151c	putative periplasmic protein	-0.186955	0.860882	0.407747	0.513244	0.61893	0.34289	0.512095	0.44475
CJJ81176_RS00795	Cj0152c	putative membrane protein	-1.01286	0.00522816	-0.673314	0.050145	-0.543915	0.158095	-0.510587	0.180028
CJJ81176_RS00800	Cj0153c	putative rRNA methylase	-0.87635	0.148068	-0.3165	0.606082	-0.550722	0.393923	-0.538213	0.404707
CJJ81176_RS00805	Cj0154c	putative tetrapyrrole methylase family protein	2.94984	8.94456e-05	3.73861	3.14378e-08	2.33932	0.00197008	1.96794	0.0119001
CJJ81176_RS00810	Cj0155c	50S ribosomal protein L31	1.62864	0.0109602	2.52751	4.68113e-06	2.11313	0.000289989	2.32696	3.86586e-05
CJJ81176_RS00815	Cj0156c	conserved hypothetical protein Cj0156c	0.899711	0.438542	-0.748568	0.47304	-0.590372	0.610876	-0.14751	0.919164
CJJ81176_RS00820	Cj0157c	putative integral membrane protein	0.444791	0.773013	-0.948192	0.395657	-0.914853	0.458341	-1.72567	0.119308
CJJ81176_RS00825	Cj0158c	putative haem-binding lipoprotein	0.288104	0.74265	-0.392035	0.537917	-0.423073	0.541123	-0.651212	0.317186
CJJ81176_RS00830	Cj0159c	putative 6-pyruvoyl tetrahydropterin synthase	0.309783	0.721948	0.853436	0.132325	0.395812	0.561322	0.646519	0.314481
CJJ81176_RS00835	Cj0160c	putative radical SAM domain protein	0.125288	0.952061	0.135197	0.904259	-0.0376539	0.977614	0.240017	0.840654
CJJ81176_RS00840	Cj0161c	putative molybdenum cofactor biosynthesis protein A	-0.154943	0.905045	0.128146	0.877808	0.068628	0.941757	0.354559	0.659543
CJJ81176_RS00845	Cj0162c	putative periplasmic protein	0.371987	0.675809	-0.143062	0.845378	0.742662	0.229606	0.827544	0.158614
CJJ81176_RS00850	Cj0163c	hypothetical protein Cj0163c	0.885222	0.458254	1.86776	0.0239485	2.31197	0.0048372	2.56931	0.0011311
CJJ81176_RS00855	Cj0164c	putative 4-hydroxybenzoate octaprenyltransferase	-0.671384	0.389542	-0.810407	0.213979	-0.483067	0.524392	-0.460145	0.550321
CJJ81176_RS00860	Cj0166	tRNA delta(2)-isopentenylpyrophosphate transferase	1.6068	0.121032	2.29088	0.00518637	2.54527	0.00215655	2.46852	0.00288011
CJJ81176_RS00865	Cj0167c	putative integral membrane protein	-0.381397	0.82503	0.122524	0.932196	0.334402	0.815569	-0.343806	0.827076
CJJ81176_RS00875	Cj0168c	putative periplasmic protein	-0.261807	0.782101	-0.66168	0.317194	-1.58158	0.0105363	-1.091	0.0998983
CJJ81176_RS00880	Cj0169	superoxide dismutase (Fe)	-0.53868	0.106069	-0.508647	0.0956847	0.607306	0.0528594	0.754879	0.0113413
CJJ81176_RS00885	n/a	hypothetical protein	-0.139718	0.821369	-0.307018	0.440872	0.64646	0.0878955	0.53928	0.168585
CJJ81176_RS00890	n/a	hypothetical protein	0.960185	0.0894065	-0.389266	0.506215	-0.483496	0.445004	-0.359089	0.578693
CJJ81176_RS00895	Cj0172c	putative saccharopine dehydrogenase	-0.52735	0.268619	-0.196567	0.672976	0.107156	0.840866	-0.0214185	0.975729
CJJ81176_RS00900	Cj0173c	putative iron-uptake ABC transport system ATP-binding protein	2.30737	0.00472681	4.01693	1.38052e-09	3.74751	3.04385e-08	3.90633	4.89346e-09
CJJ81176_RS00905	Cj0174c	putative iron-uptake ABC transport system permease protein	0.615511	0.522188	1.96421	0.00247313	1.83292	0.00779476	2.06237	0.00193085
CJJ81176_RS00910	Cj0175c	putative iron-uptake ABC transport system,periplasmic iron-binding protein	0.870624	0.155544	3.83835	1.32914e-16	4.28149	2.60369e-20	4.34598	5.39631e-21
CJJ81176_RS00915	Cj0176c	putative lipoprotein	0.870263	0.406367	1.2265	0.142691	2.14608	0.00645383	1.48134	0.0840999
CJJ81176_RS00920	Cj0182	putative transmembrane transport protein	2.00447	0.00562004	2.35393	0.000276888	1.40136	0.0635781	1.58338	0.0294361
CJJ81176_RS00925	Cj0183	putative integral membrane protein with haemolysin domain	0.459725	0.404173	-0.229028	0.66389	-0.688092	0.173618	-1.01591	0.0274969
CJJ81176_RS00930	Cj0184c	putative serine/threonine protein phosphatase	1.02719	0.190537	1.4393	0.0228624	0.416241	0.617979	0.642655	0.416106
CJJ81176_RS00935	Cj0185c	putative phnA domain protein	2.399	0.00368386	2.72436	0.000230861	1.91562	0.0217831	1.9522	0.0167936
CJJ81176_RS00940	Cj0186c	putative TerC family integral membrane protein	1.26143	0.00889982	1.21933	0.00426508	0.189251	0.76027	0.328095	0.574536
CJJ81176_RS00945	Cj0187c	phosphoribosylglycinamide formyltransferase	1.32919	0.115862	1.44656	0.0439464	0.94111	0.266183	1.27103	0.100351
CJJ81176_RS00950	Cj0188c	putative kinase	0.970867	0.330241	2.23699	0.00131472	1.33268	0.106007	1.45532	0.0700023
CJJ81176_RS00955	Cj0189c	conserved hypothetical protein Cj0189c	1.99189	0.00212319	0.742823	0.297455	0.460424	0.580182	0.510688	0.537203
CJJ81176_RS00960	Cj0190c	conserved hypothetical protein Cj0190c	1.23481	0.00902077	0.828971	0.0673983	-0.217875	0.726243	0.0567647	0.936491
CJJ81176_RS00965	Cj0191c	polypeptide deformylase	0.6598	0.214756	1.0103	0.0163299	0.335594	0.540415	0.355338	0.516874
CJJ81176_RS00970	Cj0192c	ATP-dependent Clp protease proteolytic subunit	0.242074	0.678444	0.0270778	0.957638	0.240024	0.624022	0.240468	0.633669
CJJ81176_RS00975	Cj0193c	trigger factor (peptidyl-prolyl cis /trans isomerase, chaperone)	-0.272834	0.721806	-0.0448139	0.948554	0.281456	0.666413	0.211439	0.764065
CJJ81176_RS00980	Cj0194	GTP cyclohydrolase I	-1.09302	0.145249	-1.17746	0.0641663	-0.617015	0.418447	-0.578981	0.444949
CJJ81176_RS00985	Cj0195	flagellum-specific ATP synthase	0.378649	0.557626	-0.134929	0.821308	-0.410437	0.482808	-0.394701	0.496197
CJJ81176_RS00990	Cj0196c	amidophosphoribosyltransferase	0.0203329	0.99152	-0.0840666	0.872687	-0.203299	0.691043	-0.203736	0.694213
CJJ81176_RS00995	Cj0197c	dihydrodipicolinate reductase	0.288355	0.675375	0.730929	0.0930831	0.474498	0.353868	0.406989	0.431918
CJJ81176_RS01000	Cj0198c	helicase-like protein	-1.2863	0.197677	-1.0418	0.23144	-1.54665	0.08143	-1.70433	0.0476793
CJJ81176_RS01005	Cj0199c	putative periplasmic protein	-1.30326	0.260376	-0.949671	0.340898	-0.378777	0.751397	-0.0775717	0.958005
CJJ81176_RS01010	Cj0200c	putative periplasmic protein	-0.706689	0.323496	0.0233019	0.975706	0.911735	0.144697	1.09119	0.0681207
CJJ81176_RS01015	Cj0201c	putative integral membrane protein	0.0263934	0.997681	0.323963	0.812408	-0.684699	NA	-0.194143	0.907414
CJJ81176_RS01025	Cj0203	putative citrate transporter	-1.82826	0.000588422	-1.59731	0.000721469	-0.303711	0.624022	-0.39333	0.524472
CJJ81176_RS01030	Cj0204	putative oligopeptide transporter, OPT family	-0.324894	0.51909	-0.606946	0.100603	0.724471	0.0483775	0.97601	0.00392394
CJJ81176_RS01035	Cj0205	undecaprenyl-diphosphatase	0.260697	0.720541	0.126195	0.829401	-0.436834	0.446598	0.0270054	0.974636
CJJ81176_RS01040	Cj0206	threonyl-tRNA synthetase	1.23446	0.00978245	1.76519	3.45854e-05	0.864429	0.0886554	0.835544	0.100351
CJJ81176_RS01045	Cj0207	translation initiation factor IF-3	2.45382	6.39396e-08	1.54897	0.000792586	0.950335	0.0770977	0.977228	0.0661644
CJJ81176_RS01050	Cj0208	putative DNA modification methylase (adenine-specific methyltransferase)	2.47902	0.00056655	2.25519	0.000888081	1.04372	0.227444	1.00598	0.236475
CJJ81176_RS01055	n/a	hypothetical protein	-0.647402	0.557351	1.05947	0.160643	0.898528	0.290176	0.467331	0.617026
CJJ81176_RS01060	n/a	hypothetical protein	0.377099	0.821932	1.27597	0.26049	0.415966	NA	-0.307562	0.842204
CJJ81176_RS01065	n/a	boa domain protein	0.896175	0.51855	1.93765	0.0632257	1.63676	0.162303	2.06796	0.0605735
CJJ81176_RS01070	n/a	hypothetical protein	-0.598525	0.57094	-0.736698	0.442638	-0.273427	NA	-0.496931	0.67369
CJJ81176_RS01075	n/a	serine protease	1.29645	0.227041	1.03062	0.330887	0	NA	0	1
CJJ81176_RS01080	n/a	serine protease	0.186075	0.922578	0.2752	0.828156	-0.348386	NA	-0.162572	0.91982
CJJ81176_RS01085	Cj0224	N-acetyl-gamma-glutamyl-phosphate reductase	1.23376	0.00568643	2.14858	1.00774e-08	1.87621	1.26037e-06	2.02039	1.05107e-07
CJJ81176_RS01090	Cj0225	putative acetyltransferase	2.38044	0.00089595	2.74852	1.83938e-05	2.03608	0.00371348	2.07279	0.00258944
CJJ81176_RS01095	Cj0226	acetylglutamate kinase	2.4005	0.000207304	2.66656	8.54901e-06	2.11221	0.000955287	1.8586	0.00437981
CJJ81176_RS01100	Cj0227	putative acetylornithine/succinyldiaminopimelate aminotransferase	2.32567	0.000746339	2.71951	1.55696e-05	1.74966	0.0142074	1.79066	0.0103205
CJJ81176_RS01105	Cj0228c	protein-L-isoaspartate O-methyltransferase	-1.08583	0.0676582	-0.334323	0.570443	-0.060842	0.938789	-0.00673813	1
CJJ81176_RS01110	Cj0229	putative acetyltransferase	0.975944	0.146786	0.422029	0.523679	1.06872	0.0828179	1.10034	0.0704048
CJJ81176_RS01115	Cj0230c	putative transferase protein	1.39398	0.0155632	0.56024	0.35984	-0.492752	0.487778	-0.116339	0.893089
CJJ81176_RS01120	Cj0231c	ribonucleoside-diphosphate reductase beta chain	0.318633	0.440061	-0.0872306	0.829222	-0.581128	0.0950435	-0.298336	0.440861
CJJ81176_RS01125	Cj0232c	putative integral membrane protein	0.75472	0.356023	1.05236	0.0913292	0.619382	0.413899	0.361645	0.653406
CJJ81176_RS01130	Cj0233c	putative orotate phosphoribosyltransferase	0.564963	0.337452	1.46715	0.000744057	1.19566	0.0113493	1.1196	0.0182276
CJJ81176_RS01135	Cj0234c	ribosome recycling factor	0.278811	0.528413	0.601767	0.0614978	-0.100534	0.819907	-0.287443	0.471424
CJJ81176_RS01140	Cj0235c	putative protein-export membrane protein	0.243758	0.719394	-0.0451372	0.942681	-0.581673	0.264707	-0.581806	0.260465
CJJ81176_RS01145	Cj0236c	putative integral membrane protein	-0.507195	0.316052	-0.17075	0.739931	-0.514875	0.301752	-0.365479	0.488128
CJJ81176_RS01150	Cj0237	carbonic anyhydrase	-0.823117	0.218442	-0.0155555	0.981703	-0.328817	0.617066	-0.173707	0.816687
CJJ81176_RS01155	Cj0238	putative mechanosensitive ion channel family protein	-1.05645	0.0148128	-0.282202	0.480613	-0.355509	0.417244	-0.616688	0.111051
CJJ81176_RS01160	Cj0239c	NifU protein homolog	0.281522	0.678444	-0.653092	0.181106	0.00271967	0.996661	0.133747	0.842204
CJJ81176_RS01165	Cj0240c	cysteine desulfurase (NifS protein homolog)	-0.107961	0.897187	0.260452	0.605009	1.03393	0.0193915	1.02215	0.0201376
CJJ81176_RS01170	Cj0241c	putative iron-binding protein	0.333696	0.853151	0.0642828	0.963103	0.408144	0.769086	1.17524	0.356456
CJJ81176_RS01175	Cj0243c	hypothetical protein Cj0243c	1.28164	0.283581	2.09931	0.0280216	1.65517	0.124382	1.50849	0.167749
CJJ81176_RS01180	Cj0244	50s ribosomal protein L35	2.05607	2.7885e-05	1.6341	0.000868513	0.964437	0.0898763	1.23486	0.0216643
CJJ81176_RS01185	Cj0245	50S ribosomal protein L20	1.93668	4.33063e-08	2.08932	5.11111e-10	1.77823	2.97995e-07	1.9027	2.51911e-08
CJJ81176_RS01200	Cj0248	hypothetical protein Cj0248	-0.327054	0.466796	-0.283356	0.453644	-0.207599	0.626139	-0.229308	0.596361
CJJ81176_RS01205	Cj0249	hypothetical protein Cj0249	-0.331171	0.705609	0.384276	0.499844	-0.279804	0.675515	-0.520096	0.40776
CJJ81176_RS01210	Cj0250c	putative MFS (Major Facilitator Superfamily) transport protein	-0.300159	0.653975	0.0794124	0.88325	-0.157308	0.776944	-0.017598	0.981589
CJJ81176_RS01215	Cj0251c	highly acidic protein	-0.848879	0.257658	-0.13864	0.839605	-0.208355	0.763377	0.228145	0.744563
CJJ81176_RS01220	Cj0252	molybdenum cofactor biosynthesis protein C	-0.164046	0.884891	0.269083	0.674201	0.947048	0.0992278	0.802946	0.173264
CJJ81176_RS01225	Cj0253	hypothetical protein Cj0253	-0.0448277	0.990378	0.181185	0.85356	1.05043	0.21692	0.99907	0.235785
CJJ81176_RS01230	Cj0254	hypothetical protein Cj0254	-0.707	0.283581	-0.346453	0.564212	0.252861	0.710661	0.259416	0.704823
CJJ81176_RS01235	Cj0255c	exodeoxyribonuclease	0.653199	0.366632	2.11377	7.48163e-06	1.53945	0.00271187	1.65582	0.000895305
CJJ81176_RS01240	Cj0256	putative sulfatase family protein	1.77307	0.00160494	1.75318	0.000953604	1.0679	0.0832574	1.10663	0.0701186
CJJ81176_RS01245	Cj0257	diacylglycerol kinase	2.47866	0.00522277	2.58829	0.00120608	1.92116	0.032341	2.312	0.00601345
CJJ81176_RS01250	Cj0258	putative bacterial regulatory protein, ArsR family	2.1776	0.0324711	2.29599	0.0123038	1.44912	0.184244	1.56878	0.134717
CJJ81176_RS01255	Cj0259	dihydroorotase	0.526536	0.401226	0.825012	0.0890494	0.474757	0.418447	0.69307	0.193
CJJ81176_RS01260	Cj0260c	small hydrophobic protein	-0.325804	0.811759	-2.06794	0.0128182	-1.68074	0.0535761	-1.48081	0.0869177
CJJ81176_RS01265	Cj0261c	putative SAM-dependent methyltransferase	0.402805	0.675375	0.598258	0.356333	0.584991	0.420421	0.959924	0.132089
CJJ81176_RS01270	Cj0262c	putative methyl-accepting chemotaxis signal transduction protein	-0.637757	0.36735	-0.422395	0.52404	0.0426645	0.964613	-0.00404378	1
CJJ81176_RS01275	Cj0263	zinc transporter	-0.756868	0.316052	-0.0566406	0.944671	-0.365364	0.617979	-0.525551	0.460421
CJJ81176_RS01280	Cj0264c	molybdopterin containing oxidoreductase	-2.86163	8.76147e-13	-3.71418	2.28059e-22	-3.36586	1.8652e-18	-3.62353	2.80044e-21
CJJ81176_RS01285	Cj0265c	putative cytochrome C-type haem-binding periplasmic protein	-2.97814	1.47407e-09	-3.31402	1.58799e-12	-2.66104	3.05005e-08	-2.8934	1.09904e-09
CJJ81176_RS01290	Cj0266c	putative integral membrane protein	0.928162	0.316052	1.03823	0.169353	0.546335	0.545929	1.00985	0.21006
CJJ81176_RS01295	Cj0267c	putative integral membrane protein	0.587482	0.526493	0.606811	0.407018	0.38969	0.643598	0.466463	0.578693
CJJ81176_RS01300	Cj0268c	putative transmembrane protein	0.449264	0.223761	-0.025235	0.952041	-0.048111	0.918675	-0.224163	0.575356
CJJ81176_RS01305	Cj0269c	branched-chain amino acid aminotransferase	-0.179842	0.719209	0.413924	0.210934	0.392145	0.282623	0.457822	0.189224
CJJ81176_RS01310	Cj0270	putative tautomerase family protein	-0.350491	0.704462	-0.0253588	0.973576	0.856042	0.145621	0.79373	0.174194
CJJ81176_RS01315	Cj0271	bacterioferritin comigratory protein homolog	-0.605956	0.454751	-0.172947	0.815667	0.627793	0.35729	0.330258	0.659843
CJJ81176_RS01320	Cj0272	conserved hypothetical protein Cj0272	-0.143374	0.89239	0.104743	0.878389	0.429839	0.492035	0.220115	0.751314
CJJ81176_RS01325	Cj0273	(3R)-hydroxymyristoyl-[acyl carrier protein] dehydratase	0.337287	0.526953	1.23273	0.000560295	0.693393	0.0975438	0.645675	0.125041
CJJ81176_RS01330	Cj0274	acyl-[acyl-carrier-protein]--UDP-N- acetylglucosamine O-acyltransferase	1.01967	0.0639833	0.761002	0.152876	-0.0846014	0.913692	-0.137902	0.85549
CJJ81176_RS01335	Cj0275	ATP-dependent Clp protease ATP-binding subunit	1.37653	0.0044986	1.353	0.00283946	0.550315	0.342181	0.724627	0.180028
CJJ81176_RS01340	Cj0276	homolog of E. coli rod shape-determining protein	1.62177	0.000306015	1.26629	0.00445511	0.746635	0.158725	0.662265	0.218731
CJJ81176_RS01345	Cj0277	homolog of E. coli rod shape-determining protein	1.36522	0.0413657	1.4877	0.011583	0.592079	0.436543	0.551219	0.468968
CJJ81176_RS01350	Cj0279	carbamoyl-phosphate synthase large chain	-0.346927	0.475884	-0.619617	0.10932	-0.289317	0.538254	-0.388182	0.395632
CJJ81176_RS01355	Cj0280	hypothetical protein Cj0280	1.149	0.0785686	0.381052	0.56873	-0.366665	0.627419	-0.154787	0.856051
CJJ81176_RS01360	Cj0281c	putative transaldolase	0.235441	0.800874	0.355997	0.5959	-0.19771	0.802811	-0.235116	0.769925
CJJ81176_RS01365	Cj0282c	putative phosphoserine phosphatase	-0.732352	0.178714	0.129856	0.822941	-0.485005	0.381011	-0.671569	0.191573
CJJ81176_RS01370	Cj0283c	chemotaxis protein	-0.944393	0.0288832	-1.36119	0.000403483	-1.02186	0.0155866	-1.23213	0.00218905
CJJ81176_RS01375	Cj0284c	chemotaxis histidine kinase	-0.57311	0.121792	-1.21215	8.14578e-05	-0.924354	0.00537104	-1.21773	0.000103
CJJ81176_RS01380	Cj0285c	chemotaxis protein	-0.74667	0.160731	-0.63839	0.201669	-0.0419922	0.954196	-0.149411	0.831043
CJJ81176_RS01385	Cj0286c	hypothetical protein Cj0286c	0.592102	0.552979	1.07497	0.133206	-0.0220805	0.980269	0.683975	0.413976
CJJ81176_RS01390	Cj0287c	transcription elongation factor	0.473317	0.462666	0.524199	0.321973	0.831143	0.120963	1.00381	0.0499471
CJJ81176_RS01395	Cj0288c	lipid-A-disaccharide synthase	0.466719	0.478524	0.680775	0.163313	1.09445	0.019823	1.1126	0.0153698
CJJ81176_RS01400	Cj0289c	major antigenic peptide PEB3	3.80094	1.42787e-13	3.91798	1.23584e-15	4.1754	1.32613e-17	4.39609	1.6851e-19
CJJ81176_RS01405	n/a	MFS transporter	-0.574389	0.455083	-1.12372	0.0451948	-0.985844	0.098957	-0.911864	0.120775
CJJ81176_RS01410	Cj0293	multifunctional protein SurE homolog	1.47493	0.00351489	1.05356	0.0323517	0.654947	0.262787	0.575539	0.329594
CJJ81176_RS01415	Cj0294	putative MoeB/ThiF family protein	0.582677	0.519487	0.713175	0.30699	0.154772	0.870927	0.176616	0.852921
CJJ81176_RS01420	Cj0296c	aspartate 1-decarboxylase precursor	-0.274364	0.724672	-1.10535	0.026914	-1.11932	0.0329769	-0.731456	0.186636
CJJ81176_RS01425	Cj0297c	pantoate--beta-alanine ligase	-0.95851	0.0651732	-0.827686	0.0614915	-0.542512	0.288135	-0.763231	0.10363
CJJ81176_RS01430	Cj0298c	3-methyl-2-oxobutanoate hydroxymethyltransferase	-1.03938	0.00542043	-1.1188	0.000393634	-0.737423	0.0329328	-0.565513	0.112202
CJJ81176_RS01435	Cj0300c	putative molybdenum transport ATP-binding protein	0.844037	0.411225	-0.244498	0.815667	-0.418332	0.698186	0.226116	0.85074
CJJ81176_RS01440	Cj0301c	putative molybdenum transport system permease protein	0.400116	0.733042	-0.0673848	0.947945	0.575292	0.517713	0.883204	0.277916
CJJ81176_RS01445	Cj0302c	putative molybdenum-pterin binding protein	-0.475255	0.613465	0.30581	0.633051	1.07916	0.0517571	1.22984	0.0196338
CJJ81176_RS01450	Cj0303c	putative molybdate-binding lipoprotein	-0.742608	0.204411	0.481818	0.310057	1.83605	2.75851e-06	1.67087	2.32228e-05
CJJ81176_RS01455	Cj0304c	putative biotin synthesis protein	-0.591387	0.702019	1.36072	0.200226	0.287737	0.835425	0.892251	0.473163
CJJ81176_RS01460	Cj0305c	conserved hypothetical protein Cj0305c	0	1	1.01862	0.378292	1.58008	0.187424	1.33306	0.27771
CJJ81176_RS01465	Cj0306c	8-amino-7-oxononanoate synthase	0.646223	0.410703	0.786828	0.19767	0.48172	0.502581	0.962021	0.117931
CJJ81176_RS01470	Cj0307	adenosylmethionine-8-amino-7-oxononanoate aminotransferase	0.351619	0.637688	0.462969	0.380645	0.829258	0.106279	0.885413	0.0782002
CJJ81176_RS01475	Cj0308c	putative dethiobiotin synthetase	0.219229	0.902335	1.3082	0.138488	0.829091	0.430955	0.680823	0.526241
CJJ81176_RS01480	Cj0309c	putative efflux protein	-0.257581	0.863209	0.361181	0.6841	0.0902567	0.938789	0.547216	0.559291
CJJ81176_RS01485	Cj0310c	putative efflux protein	0.541888	0.659898	1.50914	0.0417171	2.08129	0.00380293	1.79452	0.0151435
CJJ81176_RS01490	Cj0311	putative 50S ribosomal protein L25 (general stress protein Ctc)	1.51783	0.000390631	0.666649	0.154545	0.537487	0.312029	0.535273	0.312223
CJJ81176_RS01495	Cj0312	peptidyl-tRNA hydrolase	1.25992	0.0198613	0.404188	0.484023	-0.330789	0.620311	-0.728295	0.228898
CJJ81176_RS01500	Cj0313	putative integral membrane protein	-0.143851	0.941152	1.06681	0.230276	0.257713	0.822278	0.711699	0.493017
CJJ81176_RS01505	Cj0314	diaminopimelate decarboxylase	0.169277	0.760765	0.313046	0.400896	0.156996	0.726243	0.11831	0.805645
CJJ81176_RS01510	Cj0315	putative HAD-superfamily hydrolase, subfamily IIA	0.0553557	0.983652	1.30723	0.0299428	0.836809	0.239331	0.541411	0.476166
CJJ81176_RS01515	Cj0316	chorismate mutase/prephenate dehydratase	0.734148	0.223761	1.42147	0.00179506	0.779033	0.158725	0.854047	0.105694
CJJ81176_RS01520	Cj0317	histidinol-phosphate aminotransferase	-0.057528	0.965058	-0.0882949	0.883077	-0.0782568	0.910475	0.0337553	0.965401
CJJ81176_RS01525	Cj0318	flagellar M-ring protein	-0.248345	0.723083	-0.255233	0.628951	-0.506845	0.34967	-0.63183	0.220744
CJJ81176_RS01530	Cj0319	flagellar motor switch protein	-0.262741	0.564337	-1.1324	0.000161147	-1.1907	9.18866e-05	-1.35289	3.66832e-06
CJJ81176_RS01535	Cj0320	putative flagellar assembly protein	-0.239934	0.746821	-0.410871	0.418788	-0.862675	0.0851957	-0.83063	0.092169
CJJ81176_RS01540	Cj0321	L-deoxy-D-xylulose-5-phosphate synthase	0.391511	0.477479	-0.386422	0.406037	-1.18185	0.00570517	-0.667978	0.148064
CJJ81176_RS01545	Cj0322	peroxide stress regulator	-0.211241	0.860882	1.03518	0.102656	1.94461	0.000925711	1.90306	0.00114722
CJJ81176_RS01550	Cj0323	hypothetical protein Cj0323	0.545921	0.724672	-0.563445	0.646059	-1.30901	0.287062	-0.819566	0.532631
CJJ81176_RS01555	Cj0324	ubiquinone/menaquinone biosynthesis methlytransferase	0.423074	0.582927	0.785295	0.133206	0.427876	0.493864	0.246615	0.71436
CJJ81176_RS01560	Cj0325	exodeoxyribonuclease VII large subunit	0.615688	0.528413	1.52426	0.0240457	0.695368	0.41644	0.955808	0.227029
CJJ81176_RS01565	Cj0326	phosphoserine aminotransferase	-0.898205	0.158754	-0.626024	0.296583	-0.405637	0.555818	-0.356907	0.619751
CJJ81176_RS01570	Cj0327	putative endoribonuclease L-PSP family protein	-0.466587	0.459401	-0.791722	0.0816662	-0.491584	0.342519	-0.357305	0.499662
CJJ81176_RS01575	Cj0328c	3-oxoacyl-[acyl-carrier-protein] synthase	1.19199	0.0221579	0.745679	0.154384	-0.373731	0.551293	-0.523429	0.394564
CJJ81176_RS01580	Cj0329c	putative fatty acid/phospholipid synthesis protein	1.07157	0.00562004	1.1494	0.00140282	0.0385508	0.948289	-0.107128	0.851423
CJJ81176_RS01585	Cj0330c	50S ribosomal protein L32	1.73634	4.51526e-06	0.0470493	0.933706	-0.530117	0.276487	-0.648178	0.162951
CJJ81176_RS01590	Cj0331c	hypothetical protein Cj0331c	0.213447	0.860882	0.844802	0.250111	0.0957592	0.929786	-0.164531	0.874627
CJJ81176_RS01595	Cj0332c	nucleoside diphosphate kinase	0.74552	0.0839525	0.766187	0.0506512	0.17495	0.743293	0.0938316	0.874627
CJJ81176_RS01600	Cj0333c	ferredoxin	-0.47864	0.345432	-3.45741	1.23028e-19	-2.90315	1.21172e-14	-2.80773	3.6133e-14
CJJ81176_RS01605	Cj0334	alkyl hydroperoxide reductase	0.18705	0.746821	0.845288	0.0245235	2.54725	1.56948e-14	2.58263	6.89948e-15
CJJ81176_RS01610	Cj0335	flagellar biosynthetic protein	0.880249	0.141448	-0.145905	0.829401	-0.445663	0.502709	-0.40283	0.555015
CJJ81176_RS01615	Cj0336c	putative flagellar motor protein	-0.277127	0.565284	-0.764275	0.0245235	-0.74743	0.0384107	-0.745088	0.0373732
CJJ81176_RS01620	Cj0337c	putative flagellar motor proton channel	-0.391181	0.283581	-0.943845	0.000809682	-0.430348	0.210649	-0.449978	0.175906
CJJ81176_RS01625	Cj0338c	DNA polymerase I	-0.619422	0.242563	0.0169444	0.975706	0.196222	0.714205	0.148579	0.794732
CJJ81176_RS01635	Cj0340	putative nucleoside hydrolase	0.416456	0.649344	0.336602	0.628951	-0.946146	0.184703	-0.666237	0.360743
CJJ81176_RS01640	Cj0341c	putative integral membrane protein	-1.18941	0.336756	-0.824654	0.471576	-1.28527	0.287197	-1.57853	0.171395
CJJ81176_RS01645	Cj0342c	excinuclease ABC subunit A	0.825583	0.0458774	0.333936	0.438072	-0.055148	0.927205	-0.147568	0.784459
CJJ81176_RS01650	Cj0343c	putative integral membrane protein	-1.24987	0.0717422	0.395265	0.546288	0.680749	0.317338	0.622961	0.364035
CJJ81176_RS01655	Cj0344	hypothetical protein Cj0344	2.35979	0.0295451	-0.6803	0.55612	-0.779823	0.540415	-0.854243	0.508063
CJJ81176_RS01660	Cj0345	putative anthranilate synthase component I	1.47661	0.0563018	0.144278	0.881672	0.207807	0.834107	0.386152	0.691969
CJJ81176_RS01665	Cj0346	anthranilate synthase component II	1.97942	9.64684e-05	1.0188	0.0573153	1.39664	0.00877163	1.73433	0.000543962
CJJ81176_RS01670	Cj0347	N-(5'-phosphoribosyl)anthranilate isomerase	0.36498	0.754598	1.18424	0.097852	1.66406	0.0192431	1.64368	0.0190307
CJJ81176_RS01675	Cj0348	tryptophan synthase beta chain	2.40473	4.73677e-06	1.38877	0.0108093	2.20361	1.88842e-05	2.18439	2.02532e-05
CJJ81176_RS01680	Cj0349	tryptophan synthase alpha chain	2.37996	0.000165867	1.16895	0.0827622	2.66815	5.38519e-06	2.59654	9.1602e-06
CJJ81176_RS01685	Cj0350	hypothetical protein Cj0350	0.0190923	0.997681	0.326572	0.695955	1.40745	0.0590489	1.33868	0.077475
CJJ81176_RS01690	Cj0351	flagellar motor switch protein	-0.548693	0.493522	0.00726878	0.990818	0.841658	0.164215	0.749813	0.219242
CJJ81176_RS01695	Cj0352	putative transmembrane protein	-0.903269	0.23394	0.0670267	0.931183	0.21731	0.763377	0.200084	0.796693
CJJ81176_RS01700	Cj0353c	phosphatase	1.00072	0.223112	0.607588	0.43882	-0.120994	0.910475	-0.260691	0.795644
CJJ81176_RS01705	Cj0354c	ferredoxin	0.410143	0.61055	0.448954	0.454444	-0.731544	0.261981	-0.679988	0.290164
CJJ81176_RS01710	Cj0355c	two-component regulator	-0.214709	0.765667	0.293949	0.58761	0.286864	0.626762	0.39306	0.503065
CJJ81176_RS01715	Cj0356c	putative dihydroneopterin aldolase	1.11811	0.388673	-1.08847	0.342801	-0.0404221	0.980269	-0.313755	0.840753
CJJ81176_RS01720	Cj0357c	putative integral membrane protein	0.471454	0.477356	0.497035	0.340898	0.408144	0.491314	0.474596	0.411802
CJJ81176_RS01725	Cj0358	putative cytochrome C551 peroxidase	-0.190645	0.788796	-2.02717	8.25518e-07	-1.39659	0.00158554	-1.53136	0.000398615
CJJ81176_RS01730	Cj0360	phosphoglucosamine mutase	-0.367048	0.650508	-0.539205	0.383782	-0.166975	0.827756	-0.142239	0.866714
CJJ81176_RS01735	Cj0361	lipoprotein signal peptidase	0.107599	0.944634	0.568883	0.447673	0.290818	0.749535	0.511689	0.54555
CJJ81176_RS01740	Cj0362	putative integral membrane protein	0.836852	0.199685	0.154512	0.827286	0.237744	0.749535	0.529855	0.422573
CJJ81176_RS01745	Cj0363c	putative oxygen-independent coproporphyrinogen III oxidase	0.611911	0.477479	0.929437	0.1705	0.105234	0.916099	0.303729	0.727745
CJJ81176_RS01750	Cj0364	hypothetical protein Cj0364	-0.471277	0.760765	0.0805663	0.949828	1.15842	0.282623	1.03465	0.342921
CJJ81176_RS01755	Cj0365c	outer membrane channel protein CmeC (multidrug efflux system CmeABC)	0.0928795	0.906501	-0.829434	0.0411857	-0.5534	0.238027	-0.518784	0.267213
CJJ81176_RS01760	Cj0366c	inner membrane efflux transporter CmeB (multidrug efflux system CmeABC)	-0.601882	0.202097	-1.25261	0.00110252	-1.31458	0.000851356	-1.16275	0.0037445
CJJ81176_RS01765	Cj0367c	periplasmic fusion protein CmeA (multidrug efflux system CmeABC)	-1.18222	0.0432877	-0.809508	0.151679	-0.482899	0.471895	-0.386654	0.575156
CJJ81176_RS01770	Cj0368c	transcriptional regulator CmeR	-0.110596	0.916472	-0.0916301	0.88325	0.478689	0.395784	0.537363	0.317358
CJJ81176_RS01775	Cj0369c	putative ferredoxin domain-containing integral membrane protein	-0.895038	0.0717422	-1.2124	0.00388588	-0.771735	0.106007	-0.728614	0.127234
CJJ81176_RS01780	Cj0370	30S ribosomal protein S21	-1.02354	0.26886	-1.42141	0.076303	-0.0803372	0.946702	0.332498	0.762771
CJJ81176_RS01785	n/a	colicin	-0.463455	0.766426	-2.13203	0.036952	-1.97047	0.0719788	-1.78161	0.105411
CJJ81176_RS01790	Cj0371	putative flagellar motility protein	0.0517176	0.970847	-0.597464	0.256086	-0.21391	0.747188	-0.13479	0.851423
CJJ81176_RS01795	Cj0372	putative glutathionylspermidine synthase	-1.22891	0.0916133	-0.844718	0.235552	-0.516026	0.535757	-0.716474	0.370095
CJJ81176_RS01800	Cj0373	putative D-2-hydroxyacid dehydrogenase	-1.29161	0.00642027	-1.38468	0.00151433	-1.06456	0.0266468	-1.10158	0.0196112
CJJ81176_RS01805	Cj0374	conserved hypothetical protein Cj0374	-0.110352	0.916472	-0.707843	0.181106	-0.228413	0.726243	-0.328206	0.598572
CJJ81176_RS01810	Cj0375	putative lipoprotein	-0.326204	0.822791	1.04951	0.199185	0.636745	0.509361	0.524029	0.598446
CJJ81176_RS01815	Cj0376	putative periplasmic protein	-0.0381194	0.993423	0.406088	0.646246	0.125497	0.912904	0.252183	0.816687
CJJ81176_RS01820	Cj0377	putative AAA family ATPase	0.558388	0.540226	0.67589	0.321973	0.0993045	0.917987	0.249145	0.777004
CJJ81176_RS01825	Cj0378c	putative ferric reductase-like transmembrane protein. Functional classification-Membranes,lipoproteins and porins	1.86834	0.0970101	0.478994	0.694642	1.43891	0.215382	1.69635	0.119103
CJJ81176_RS01830	Cj0379c	putative molybdenum containing oxidoreductase	1.59647	0.000441204	1.93156	3.60464e-06	2.74854	8.54926e-12	2.97988	6.58313e-14
CJJ81176_RS01835	n/a	orotidine 5'-phosphate decarboxylase	0.114112	0.906501	-0.38898	0.470839	-1.0053	0.0535115	-0.707892	0.188772
CJJ81176_RS01840	Cj0382c	transcription termination protein	0.294797	0.730173	-0.0897649	0.904369	-0.478195	0.489306	-0.522695	0.441873
CJJ81176_RS01845	Cj0383c	6,7-dimethyl-8-ribityllumazine synthase	-0.788435	0.190524	-1.2353	0.0138067	-1.1902	0.0263904	-1.08331	0.0449376
CJJ81176_RS01850	Cj0384c	3-deoxy-8-phosphooctulonate synthase	-0.783763	0.143963	-0.81618	0.0877382	-0.700305	0.189503	-0.789145	0.122581
CJJ81176_RS01855	Cj0385c	putative integral membrane protein	0.591561	0.434399	0.986666	0.0699869	0.703292	0.265033	0.812832	0.173262
CJJ81176_RS01860	Cj0386	putative GTP-binding protein	-0.286681	0.616909	0.113403	0.811786	-0.347865	0.447285	-0.23941	0.61293
CJJ81176_RS01865	Cj0387	shikimate kinase	0.0318401	0.994794	0.778388	0.256522	0.169021	0.853605	0.333876	0.694213
CJJ81176_RS01870	Cj0388	tryptophanyl-tRNA synthetase	-0.740293	0.0817222	-0.409488	0.274984	-0.587434	0.127939	-0.340727	0.413976
CJJ81176_RS01875	Cj0389	seryl-tRNA synthetase	-0.252307	0.719209	-0.929582	0.0440828	-0.742015	0.152694	-0.871037	0.0795564
CJJ81176_RS01880	Cj0390	putative transmembrane protein	-0.57557	0.227312	-0.487579	0.242989	-0.862742	0.0348756	-0.764077	0.0671938
CJJ81176_RS01885	Cj0391c	hypothetical protein Cj0391c	-0.884699	0.384306	-0.663659	0.47728	0.169022	0.894443	0.000296075	1
CJJ81176_RS01890	Cj0392c	pyruvate kinase	-0.896412	0.0428346	-0.88915	0.0292814	-0.352551	0.489537	-0.250954	0.641025
CJJ81176_RS01895	Cj0393c	putative malate:quinone oxidoreductase	-2.44353	1.7547e-08	-2.2795	3.80211e-08	-1.75325	5.50098e-05	-1.76336	4.34207e-05
CJJ81176_RS01900	Cj0394c	putative transcriptional activator	-0.726895	0.539611	-1.0793	0.23647	-2.64743	0.00266991	-1.15937	0.228898
CJJ81176_RS01905	Cj0395c	hypothetical protein Cj0395c	0.782737	0.586027	-0.640192	0.601797	-0.834849	NA	-0.539256	0.703801
CJJ81176_RS01910	Cj0396c	putative lipoprotein	-0.323586	0.667141	-0.678589	0.201028	-0.915955	0.0928005	-0.630365	0.277916
CJJ81176_RS01915	Cj0397c	hypothetical protein Cj0397c	-0.188801	0.895993	-1.07028	0.170556	-0.303494	0.758913	-0.37832	0.698498
CJJ81176_RS01920	Cj0398	Glu-tRNAGln amidotransferase subunit C	-0.809312	0.283581	-0.715774	0.242989	0.166967	0.825496	0.0276543	0.978436
CJJ81176_RS01925	Cj0399	colicin V production protein homolog	-0.414827	0.451411	0.626564	0.133963	0.431198	0.376984	0.54585	0.236475
CJJ81176_RS01930	Cj0400	ferric uptake regulator	-0.216207	0.690944	-0.305096	0.430392	0.0281246	0.959033	0.0702437	0.893123
CJJ81176_RS01935	Cj0401	lysyl-tRNA synthetase	0.280449	0.439154	0.408514	0.155863	0.0785579	0.835425	0.259341	0.440861
CJJ81176_RS01940	Cj0402	serine hydroxymethyltransferase	-0.613705	0.231641	-0.934891	0.0321385	-1.22408	0.00517784	-1.11638	0.0121468
CJJ81176_RS01955	Cj0404	putative transmembrane protein	0.016934	0.994794	-0.487615	0.289544	-0.814491	0.0763451	-0.601276	0.218731
CJJ81176_RS01960	Cj0405	shikimate 5-dehydrogenase	0.378986	0.63768	1.16252	0.0299569	0.600766	0.358733	0.994317	0.0898997
CJJ81176_RS01965	Cj0406c	putative lipoprotein	-0.146487	0.825085	-0.758283	0.0565588	-0.341203	0.484834	-0.236066	0.643164
CJJ81176_RS01970	Cj0407	prolipoprotein diacylglyceryl transferase	-0.392554	0.621644	0.539971	0.309068	0.647598	0.253551	0.909508	0.0791615
CJJ81176_RS01975	Cj0408	fumarate reductase cytochrome B subunit	-1.99745	0.000204279	-2.48469	1.02125e-06	-1.85669	0.000624749	-1.92353	0.000333341
CJJ81176_RS01980	Cj0409	fumarate reductase flavoprotein subunit	-1.28697	0.0171089	-3.12898	1.19429e-11	-2.53281	1.00179e-07	-2.73405	6.01263e-09
CJJ81176_RS01985	Cj0410	fumarate reductase iron-sulfur protein	-1.63311	1.40192e-06	-3.36254	1.63399e-26	-2.4668	9.75216e-15	-2.38699	6.20471e-14
CJJ81176_RS01990	Cj0411	putative ATP/GTP binding protein	0.798876	0.329778	0.257134	0.755608	-0.0604466	0.954196	0.0814888	0.937451
CJJ81176_RS01995	Cj0412	putative ATP/GTP binding protein	0.458713	0.605643	-0.197659	0.803625	-0.77036	0.298962	-0.553924	0.467319
CJJ81176_RS02000	Cj0413	putative periplasmic protein	-0.0363718	0.994794	0.756714	0.401898	1.0501	0.262787	1.63798	0.050067
CJJ81176_RS02005	Cj0414	putative oxidoreductase subunit	-3.73421	3.37781e-12	-5.61669	8.73582e-28	-5.25848	1.28357e-24	-5.59184	6.8433e-28
CJJ81176_RS02010	Cj0415	putative GMC oxidoreductase subunit	-3.992	1.01453e-12	-6.14286	2.4762e-30	-6.12567	3.745e-30	-6.26913	1.14032e-31
CJJ81176_RS02015	Cj0416	hypothetical protein Cj0416	-1.42525	0.164682	-1.24801	0.142048	0.147131	0.899319	0.407	0.681251
CJJ81176_RS02020	Cj0417	hypothetical protein Cj0417	-0.869547	0.298029	-1.44388	0.026914	0.141247	0.8751	0.387871	0.626858
CJJ81176_RS02025	Cj0418c	hypothetical protein Cj0418c	-1.58665	0.00207226	-1.47019	0.00239338	-0.582439	0.338698	-0.496105	0.424292
CJJ81176_RS02030	Cj0419	putative histidine triad (HIT) family protein	0.39119	0.795452	-0.462207	0.674145	0.993685	0.337325	0.864947	0.41049
CJJ81176_RS02035	Cj0420	putative periplasmic protein	-0.824309	0.236862	-0.531515	0.422719	0.45633	0.540315	0.851967	0.21016
CJJ81176_RS02040	Cj0421c	putative integral membrane protein	0.694461	0.490633	-1.14867	0.170005	-0.864766	0.355451	-1.40527	0.0991999
CJJ81176_RS02045	n/a	ABC transporter ATP-binding protein	-1.3511	0.0225916	-1.06504	0.0625206	-0.43043	0.542616	-0.622469	0.363043
CJJ81176_RS02050	n/a	hypothetical protein	-1.98732	8.0463e-05	-1.42825	0.00361294	-0.645006	0.287062	-0.826523	0.149281
CJJ81176_RS02055	n/a	hypothetical protein	-0.0234512	0.993423	-1.25364	0.00960337	-0.659759	0.259789	-0.540826	0.370095
CJJ81176_RS02060	n/a	phosphoenolpyruvate carboxykinase	0.813247	0.374083	-0.00282893	0.998108	-0.0236011	0.980269	0.0814904	0.942854
CJJ81176_RS02065	n/a	membrane protein	0.276482	0.855995	-0.236253	0.825591	0.10317	0.938789	0.477995	0.654833
CJJ81176_RS02070	n/a	ATP-binding protein	-1.11542	0.366473	-0.653802	0.568249	-0.995181	0.41644	-0.967372	0.424292
CJJ81176_RS02100	Cj0432c	UDP-N-acetylmuramoylalanine--D-glutamate ligase	1.32354	0.0433425	0.754256	0.242989	-0.121886	0.897135	0.0503811	0.960647
CJJ81176_RS02105	Cj0433c	phospho-N-acetylmuramoyl-pentapeptide- transferase	-0.504454	0.505326	0.928012	0.0758928	0.499539	0.433658	0.362052	0.585793
CJJ81176_RS02110	Cj0434	2,3-bisphosphoglycerate-independent phosphoglycerate mutase	-0.44456	0.612322	-0.0515509	0.949828	0.571929	0.443471	0.321222	0.694213
CJJ81176_RS02115	n/a	3-ketoacyl-ACP reductase	0.430287	0.78919	0.589571	0.634679	0.845454	0.522061	0.64508	0.641062
CJJ81176_RS02120	Cj0435	3-oxoacyl-[acyl-carrier protein] reductase	0.0726806	0.923201	0.158908	0.701886	0.238708	0.584423	-0.110489	0.831043
CJJ81176_RS02125	Cj0436	putative pyridoxamine 5'-phosphate oxidase	-0.0617936	0.970847	0.663584	0.231634	0.530613	0.404036	0.311131	0.643164
CJJ81176_RS02130	Cj0437	succinate dehydrogenase flavoprotein subunit	-1.51457	0.0338166	-3.10678	3.94168e-07	-3.70437	1.1839e-09	-3.94472	6.17778e-11
CJJ81176_RS02135	Cj0438	putative succinate dehydrogenase iron-sulfur protein	-1.97506	0.00249044	-3.97495	1.19429e-11	-4.53151	1.22461e-14	-4.707	6.75825e-16
CJJ81176_RS02140	Cj0439	putative succinate dehydrogenase subunit C	-2.52341	0.000135434	-3.8245	4.04577e-10	-3.87108	3.58084e-10	-4.2917	1.76309e-12
CJJ81176_RS02145	Cj0440c	putative transcriptional regulator	0.0565666	0.974983	0.624768	0.263605	1.33557	0.00954981	1.46974	0.00304351
CJJ81176_RS02150	Cj0441	acyl carrier protein	-0.394145	0.398174	-0.00511367	0.990818	0.340176	0.432144	0.316367	0.465014
CJJ81176_RS02155	Cj0442	3-oxoacyl-[acyl-carrier-protein] synthase	0.173802	0.708671	-0.339246	0.315424	-0.424474	0.238201	-0.524715	0.124519
CJJ81176_RS02160	Cj0443	acetyl-coenzyme A carboxylase carboxyl transferase subunit alpha	0.622364	0.0573936	0.151693	0.671143	-0.367175	0.306441	-0.399999	0.25096
CJJ81176_RS02165	Cj0444	ligand-gated channel	1.13062	0.0234667	4.31039	8.89354e-30	4.50448	4.43518e-32	4.37676	1.45008e-30
CJJ81176_RS02170	Cj0447	putative NUDIX hydrolase family protein	0.380888	0.63768	1.9686	1.51856e-05	1.70489	0.000372522	1.51884	0.0016752
CJJ81176_RS02175	Cj0448c	putative MCP-type signal transduction protein	-2.40445	6.83603e-12	-3.09723	1.53817e-20	-2.24157	4.80971e-11	-2.2158	7.3711e-11
CJJ81176_RS02180	Cj0449c	conserved hypothetical protein Cj0449c	-2.38533	4.15822e-11	-2.56131	2.28588e-14	-1.56502	9.10648e-06	-1.43403	5.24873e-05
CJJ81176_RS02185	Cj0450c	50S ribosomal protein L28	0.498504	0.573911	1.23644	0.0536361	0.607908	0.44019	0.929943	0.198851
CJJ81176_RS02190	Cj0451	ribulose-phosphate 3-epimerase	-0.865033	0.137669	0.109204	0.85356	-0.430308	0.448566	-0.37026	0.520734
CJJ81176_RS02195	Cj0452	exonuclease, dna polymerase III epsilon subunit	0.940203	0.301754	1.97608	0.00323409	0.653866	0.471399	0.570999	0.532631
CJJ81176_RS02200	Cj0453	thiamin biosynthesis protein ThiC	-1.48531	0.0029409	0.216617	0.714018	0.44067	0.474388	0.287923	0.659851
CJJ81176_RS02205	Cj0454c	putative membrane protein	-0.935624	0.291018	0.463531	0.530233	-0.219668	0.80538	-0.180739	0.851238
CJJ81176_RS02210	n/a	membrane protein	-0.357166	0.771648	-0.862327	0.296583	-0.92909	0.301752	-1.48193	0.0725369
CJJ81176_RS02215	Cj0456c	hypothetical protein Cj0456c	-0.144691	0.928769	0.226621	0.809687	0.0208695	0.98094	-0.0619777	0.960221
CJJ81176_RS02220	Cj0457c	putative lipoprotein	0.633901	0.445159	0.220026	0.781315	0.099675	0.916624	0.122252	0.898428
CJJ81176_RS02225	Cj0458c	putative tRNA 2-methylthioadenosine synthase	-0.0771956	0.934022	-0.252343	0.606082	-0.491433	0.32846	-0.495222	0.317815
CJJ81176_RS02230	Cj0459c	hypothetical protein Cj0459c	-0.968136	0.205862	0.609992	0.319154	0.639341	0.342519	1.11255	0.0623954
CJJ81176_RS02235	Cj0460	transcription termination factor	1.07293	0.0504804	0.999343	0.0451948	0.37299	0.551293	0.0639329	0.936491
CJJ81176_RS02240	Cj0461c	putative MFS (Major Facilitator Superfamily) transport protein	0.360083	0.74265	-0.0644488	0.947945	-0.269187	0.775406	-0.267627	0.787433
CJJ81176_RS02245	Cj0462	putative radical SAM domain protein	0.188842	0.760765	-0.0692186	0.894283	0.270419	0.580287	0.285112	0.566096
CJJ81176_RS02250	Cj0463	zinc protease-like protein	0.222172	0.761236	1.31717	0.000751376	1.22782	0.00266991	1.27352	0.00146082
CJJ81176_RS02255	Cj0464	ATP-dependent DNA helicase	0.711691	0.324074	0.659158	0.280144	0.285507	0.702596	0.268941	0.722009
CJJ81176_RS02260	Cj0465c	group III truncated haemoglobin	0.0449009	0.990378	0.635676	0.410185	1.51588	0.0295403	1.75385	0.00785077
CJJ81176_RS02265	Cj0466	transcriptional regulator	2.24305	0.0257462	2.01631	0.0280216	1.89022	0.054626	2.24532	0.0157186
CJJ81176_RS02270	Cj0467	amino-acid ABC transporter integral membrane protein	-0.0267914	0.994794	-0.300085	0.689112	-0.618393	0.429856	-0.584713	0.449801
CJJ81176_RS02275	Cj0468	amino-acid ABC transporter integral membrane protein	0.401642	0.596898	0.0661544	0.928589	-0.303704	0.648042	-0.200157	0.780108
CJJ81176_RS02280	Cj0469	amino-acid ABC transporter ATP-binding protein	0.334621	0.74265	1.01822	0.11492	0.895401	0.216871	0.729002	0.323045
CJJ81176_RS02305	Cj0470	elongation factor TU	1.50458	5.01698e-06	0.214605	0.606082	-0.351607	0.424448	-0.257583	0.575464
CJJ81176_RS02310	Cj0471	50S ribosomal protein L33	1.63831	9.92184e-05	0.549271	0.249286	-0.486138	0.373067	-0.292356	0.61293
CJJ81176_RS02320	Cj0472	preprotein translocase SecE subunit	1.48975	0.00135804	1.74592	5.18922e-05	0.420745	0.480812	0.622593	0.258183
CJJ81176_RS02325	Cj0473	transcription antitermination protein	1.63062	4.10088e-06	1.2713	0.000335141	-0.0733123	0.900271	0.107074	0.851238
CJJ81176_RS02330	Cj0474	50S ribosomal protein L11	1.69572	0.000306015	1.4561	0.00159448	0.612543	0.29065	0.74266	0.179617
CJJ81176_RS02335	Cj0475	50S ribosomal protein L1	1.99148	1.13627e-06	1.16705	0.00613528	0.422761	0.441436	0.556327	0.289194
CJJ81176_RS02340	Cj0476	50S ribosomal protein L10	1.83459	0.000140023	1.92352	3.25359e-05	0.843213	0.136541	0.737096	0.201631
CJJ81176_RS02345	Cj0477	50S ribosomal protein L7/L12	2.07986	5.19492e-11	1.42235	8.32831e-06	0.44368	0.287197	0.542126	0.17153
CJJ81176_RS02350	Cj0478	DNA-directed RNA polymerase beta chain	1.76617	1.49202e-05	1.25106	0.0025444	0.495576	0.345717	0.611098	0.22707
CJJ81176_RS02355	Cj0479	DNA-directed RNA polymerase beta' chain	1.4144	0.000659447	0.833924	0.0547016	0.189771	0.747188	0.168967	0.780108
CJJ81176_RS02360	Cj0491	30S ribosomal protein S12	1.76513	3.07356e-05	0.881297	0.0527421	0.441038	0.429914	0.416733	0.457662
CJJ81176_RS02365	Cj0492	30S ribosomal protein S7	1.15987	0.0827912	1.33981	0.026914	0.619728	0.413899	0.450139	0.569645
CJJ81176_RS02370	Cj0493	elongation factor G	1.68431	0.000204279	0.664979	0.188952	0.194319	0.76027	0.0284912	0.974636
CJJ81176_RS02380	Cj0494	putative exporting protein	1.40102	0.0890407	1.98813	0.00310948	0.961712	0.254789	0.942663	0.258576
CJJ81176_RS02385	Cj0495	putative methyltransferase domain protein	1.86699	0.0263998	1.39912	0.0776151	0.668538	0.497304	0.212508	0.856051
CJJ81176_RS02390	Cj0496	conserved hypothetical protein Cj0496	0.285326	0.876241	1.51932	0.128027	0.909721	0.444173	0.86105	0.470274
CJJ81176_RS02395	Cj0497	putative lipoprotein	0.91211	0.145902	1.09375	0.0349689	0.544806	0.402471	0.959933	0.0869177
CJJ81176_RS02400	Cj0498	indole-3-glycerol phosphate synthase	-0.263411	0.775904	0.329894	0.581721	-0.224178	0.752125	-0.210829	0.769526
CJJ81176_RS02405	Cj0499	putative histidine triad (HIT) family protein	0.879762	0.197677	-0.342792	0.618888	-0.675765	0.342519	-0.037302	0.97149
CJJ81176_RS02410	Cj0500	putative rhodanese-like domain protein	0.629011	0.464309	-0.193196	0.815667	-0.794696	0.312724	-0.437078	0.594732
CJJ81176_RS02415	n/a	hypothetical protein	0	NA	0.206325	NA	0	NA	0	NA
CJJ81176_RS02420	n/a	hypothetical protein	0	NA	0	NA	0.148022	NA	0.800663	NA
CJJ81176_RS02425	n/a	hypothetical protein	0.540296	0.730173	0.266993	0.845378	-0.0513999	0.976233	0.49072	0.732646
CJJ81176_RS02430	n/a	hypothetical protein	0.472796	0.768113	0.691798	0.551404	0.931872	0.451334	0.582609	0.660657
CJJ81176_RS02440	n/a	membrane protein	1.18131	0.312966	0.298295	0.815667	0.353904	NA	1.23095	0.312223
CJJ81176_RS02445	Cj0503c	putative ferrochelatase	1.41459	0.123027	2.09887	0.00380033	1.83516	0.0197871	1.97917	0.00910945
CJJ81176_RS02450	Cj0504c	putative oxidoreductase	1.34619	0.0518683	1.56688	0.00808733	0.399301	0.619391	0.320265	0.702297
CJJ81176_RS02455	Cj0505c	putative aminotransferase (degT family). Functional classification-Misc	1.47519	0.00642027	1.92971	7.21837e-05	1.1985	0.0307757	1.21222	0.0274969
CJJ81176_RS02460	Cj0506	alanyl-tRNA synthetase	-0.0196148	0.99152	-0.479578	0.248245	-0.0975508	0.859941	-0.139081	0.803016
CJJ81176_RS02465	Cj0507	Maf-like protein	1.9502	0.0443538	0.444574	0.683688	1.22561	0.238027	0.532575	0.653406
CJJ81176_RS02470	Cj0508	penicillin-binding protein	0.38714	0.388673	0.0708032	0.878626	-0.112833	0.813133	0.0748228	0.888706
CJJ81176_RS02475	Cj0509c	ATP-dependent Clp protease ATP-binding subunit	-0.257185	0.702019	-0.479956	0.319087	0.590503	0.248108	0.566392	0.270607
CJJ81176_RS02480	Cj0510c	conserved hypothetical protein Cj0510c	-2.00914	0.0593347	-1.31627	0.181875	-0.697555	0.538132	-0.45274	0.702297
CJJ81176_RS02485	Cj0511	putative secreted protease	-0.192858	0.721948	0.45778	0.196883	0.731067	0.034807	0.657718	0.0649111
CJJ81176_RS02490	Cj0512	phosphoribosylaminoimidazole-succinocarboxamide synthase	0.109009	0.877313	0.363297	0.34403	0.671668	0.0738225	0.403918	0.328441
CJJ81176_RS02495	Cj0513	phosphoribosylformylglycinamidine (FGAM) synthase	0.123182	0.893013	0.0785488	0.893905	0.239246	0.670245	0.0620994	0.928191
CJJ81176_RS02500	Cj0514	phosphoribosylformylglycinamidine synthase I	-0.252826	0.800874	0.641661	0.330145	0.390565	0.610876	0.196953	0.827076
CJJ81176_RS02505	Cj0515	putative periplasmic protein	-0.318605	0.720569	1.54293	0.00151443	0.825809	0.162303	0.616713	0.317358
CJJ81176_RS02510	Cj0516	putative 1-acyl-SN-glycerol-3-phosphate acyltransferase	0.977952	0.246626	1.71882	0.00651765	0.569285	0.499936	1.07716	0.143295
CJJ81176_RS02515	Cj0517	CrcB protein homolog	-0.0926139	0.980313	-0.742026	0.539384	-0.784777	0.550939	-0.740512	0.589023
CJJ81176_RS02520	Cj0518	hsp90 family heat shock protein	0.49556	0.267349	1.00477	0.00438964	0.870676	0.0230511	0.845092	0.0274969
CJJ81176_RS02525	Cj0519	putative rhodanese-like domain protein	0.336752	0.730173	0.814621	0.220274	0.482778	0.538254	0.325953	0.694213
CJJ81176_RS02530	Cj0520	putative membrane protein	1.31712	0.0725675	1.43038	0.0239105	1.06604	0.140891	1.24492	0.0701591
CJJ81176_RS02535	n/a	Na/Pi-cotransporter	1.67489	0.00230996	1.58347	0.00156786	0.750525	0.237911	0.906599	0.122531
CJJ81176_RS02540	Cj0525c	putative penicillin-binding protein	0.38161	0.678444	0.670032	0.305862	0.0169448	0.981047	0.175943	0.842204
CJJ81176_RS02545	Cj0526c	flagellar hook-basal body complex protein	-0.466246	0.616093	-0.971282	0.159035	-0.733553	0.351305	-0.518843	0.532631
CJJ81176_RS02550	Cj0527c	flagellar basal-body rod protein	-0.768635	0.246561	-0.925914	0.111278	-0.386729	0.583698	-0.377137	0.604177
CJJ81176_RS02555	Cj0528c	flagellar basal-body rod protein	-0.620398	0.468745	-1.00836	0.145532	-0.226484	0.801013	-0.318336	0.720423
CJJ81176_RS02560	Cj0529c	putative aminodeoxychorismate lyase family protein	0.377805	0.604206	-0.433197	0.438762	-0.333582	0.587944	0.110952	0.878946
CJJ81176_RS02565	Cj0530	putative periplasmic protein	-2.18893	0.00207226	-1.1093	0.0991449	-0.705109	0.368844	-0.746013	0.331602
CJJ81176_RS02570	Cj0531	isocitrate dehydrogenase	-1.58851	0.00565103	-1.48557	0.00738049	-0.646673	0.351305	-0.713332	0.29617
CJJ81176_RS02575	Cj0532	malate dehydrogenase	-1.58075	0.0182417	-1.25145	0.0554981	-0.829468	0.275114	-0.923972	0.215042
CJJ81176_RS02580	Cj0533	succinyl-coA synthetase beta chain	-1.16422	0.00175033	-2.25733	1.2308e-11	-1.49194	2.51142e-05	-1.56178	8.50643e-06
CJJ81176_RS02585	Cj0534	succinyl-coA synthetase alpha chain	-1.067	0.000619266	-2.38754	1.34391e-17	-1.72486	1.93229e-09	-1.74505	1.09904e-09
CJJ81176_RS02590	Cj0535	OORD subunit of 2-oxoglutarate:acceptor oxidoreductase	-1.67831	1.52628e-05	-3.03845	2.8629e-17	-2.47479	9.92455e-12	-2.42321	2.20608e-11
CJJ81176_RS02595	Cj0536	OORA subunit of 2-oxoglutarate:acceptor oxidoreductase	-1.49621	0.000188733	-3.2855	1.49237e-19	-2.78936	2.87087e-14	-2.63859	7.42268e-13
CJJ81176_RS02600	Cj0537	OORB subunit of 2-oxoglutarate:acceptor oxidoreductase	-1.04031	0.00751253	-3.2306	5.87774e-22	-2.76546	2.65818e-16	-2.73855	4.73328e-16
CJJ81176_RS02605	Cj0538	OORC subunit of 2-oxoglutarate:acceptor oxidoreductase	-1.51745	0.00815783	-2.72245	9.91909e-08	-2.28894	1.52498e-05	-2.13422	6.08809e-05
CJJ81176_RS02610	Cj0539	hypothetical protein Cj0539	0.462333	0.678444	1.35853	0.0398259	1.86028	0.00380293	1.92427	0.00221405
CJJ81176_RS02615	Cj0540	putative exporting protein	0.314649	0.714366	0.581346	0.296392	0.445253	0.485478	0.243188	0.723246
CJJ81176_RS02620	Cj0541	polyprenyl synthetase	-0.0352308	0.990378	0.522445	0.414546	0.391612	0.587604	0.472247	0.509935
CJJ81176_RS02625	Cj0542	glutamyl-tRNA reductase	0.351111	0.613405	0.0678176	0.915524	-0.356859	0.543184	-0.32278	0.588867
CJJ81176_RS02630	Cj0543	prolyl-tRNA synthetase	0.268512	0.688432	0.258715	0.615265	0.0536789	0.938789	0.0351343	0.962547
CJJ81176_RS02635	Cj0544	putative integral memnbrane protein	-0.801355	0.452856	0.724334	0.365562	-0.131185	0.908652	-0.197715	0.856051
CJJ81176_RS02640	Cj0545	porphobilinogen deaminase	-0.0501244	0.977386	0.394322	0.471576	-0.123755	0.861627	0.0877829	0.908745
CJJ81176_RS02645	Cj0546	putative 3-octaprenyl-4-hydroxybenzoate carboxy-lyase	0.656944	0.196624	0.527489	0.242566	-0.0243322	0.971203	0.0834503	0.897477
CJJ81176_RS02650	Cj0547	flagellar protein	0.314208	0.574801	-1.08682	0.00587882	-0.699016	0.124613	-0.804621	0.0693354
CJJ81176_RS02655	Cj0548	flagellar hook-associated protein	-0.951955	0.112922	-1.12113	0.0388819	-0.846744	0.17102	-1.08088	0.0657683
CJJ81176_RS02660	Cj0549	flagellar protein	-0.915804	0.170563	-0.538691	0.401898	-0.370951	0.610876	-0.645634	0.351269
CJJ81176_RS02665	Cj0550	hypothetical protein Cj0550	-0.955092	0.181177	-1.95	0.000782792	-2.04529	0.000607747	-2.49574	1.24672e-05
CJJ81176_RS02670	Cj0551	elongation factor P	1.20664	0.011294	0.641282	0.197843	0.485301	0.400406	0.220642	0.727757
CJJ81176_RS02675	Cj0552	putative membrane protein	-2.60438	4.56636e-07	-2.56997	6.62881e-09	-0.851738	0.0966272	-0.690241	0.191573
CJJ81176_RS02680	Cj0553	putative integral membrane protein	-4.2551	6.30201e-13	-3.76527	1.33235e-16	-1.62375	0.000362405	-1.6918	0.000135294
CJJ81176_RS02685	Cj0554	hypothetical protein Cj0554	-3.63838	3.21959e-09	-2.74172	1.54167e-08	-1.09632	0.0429243	-1.07974	0.0450763
CJJ81176_RS02690	Cj0555	putative dicarboxylate carrier protein MatC	-0.94082	0.155943	-1.36216	0.014749	-1.29948	0.0293634	-1.06775	0.082806
CJJ81176_RS02695	Cj0556	putative amidohydrolase family protein	-1.7583	0.0145248	-0.359303	0.56873	-0.368459	0.587944	0.0231278	0.981589
CJJ81176_RS02700	Cj0557c	putative integral membrane protein	-0.114024	0.916472	-0.830172	0.128365	-0.728769	0.227411	-0.622229	0.302561
CJJ81176_RS02705	Cj0558c	gamma-glutamyl phosphate reductase	-0.549078	0.31051	-0.130734	0.797622	0.101224	0.854134	0.0860096	0.88582
CJJ81176_RS02710	Cj0559	putative pyridine nucleotide-disulphide oxidoreductase	0.207521	0.672285	0.339764	0.330887	1.35574	3.35814e-06	1.30856	7.43035e-06
CJJ81176_RS02715	Cj0560	putative MATE family transport protein	1.16097	0.193854	0.386739	0.671813	-0.254708	0.811522	-0.447615	0.660716
CJJ81176_RS02720	Cj0561c	putative periplasmic protein	0.0506875	0.982559	-0.796604	0.220274	-0.237593	0.763377	-0.0631292	0.948188
CJJ81176_RS02725	Cj0562	replicative DNA helicase	-0.34434	0.514166	-0.0792616	0.868061	-0.064035	0.90681	0.21443	0.640123
CJJ81176_RS02730	Cj0563	hypothetical protein Cj0563	0.41539	0.754809	-0.213667	0.845378	-1.01432	0.328355	-0.72106	0.496197
CJJ81176_RS02735	Cj0564	putative integral membrane protein	1.56859	0.131063	0	1	0	NA	0.702114	0.57473
CJJ81176_RS02740	n/a	hypothetical protein	-0.506431	0.746821	0.996	0.382359	1.01861	0.421476	0.542305	0.694213
CJJ81176_RS02745	n/a	hypothetical protein	-0.222803	0.911744	0.0999548	0.946501	-0.0467264	NA	-0.993006	0.448004
CJJ81176_RS02750	n/a	hypothetical protein	-0.815826	0.504924	0.180166	0.89516	-1.11316	0.358209	-0.528056	0.702297
CJJ81176_RS02755	n/a	hypothetical protein	0.460458	0.777188	0.740742	0.538242	0.604891	0.653626	0.282467	0.856051
CJJ81176_RS02760	n/a	hypothetical protein	0.787872	0.580469	0.110207	0.94073	-0.00848187	0.996017	0.583634	0.677349
CJJ81176_RS02770	Cj0571	putative transcriptional regulator	0.302438	0.843143	0.755238	0.406765	-1.15383	0.261059	-0.725386	0.49376
CJJ81176_RS02785	Cj0572	GTP cyclohydrolase II / 3,4-dihydroxy-2-butanone 4-phosphate synthase	-1.10293	0.0428346	-1.14291	0.0199216	-0.29781	0.634049	-0.490384	0.418067
CJJ81176_RS02790	Cj0573	putative GatB/Yqey family protein	-1.66171	0.0193411	-0.325432	0.666626	0.120262	0.900271	-0.101767	0.921642
CJJ81176_RS02795	Cj0574	acetolactate synthase large subunit	-1.06371	0.0301852	-1.47787	0.000706758	-1.28689	0.00531871	-1.42325	0.00154468
CJJ81176_RS02800	Cj0575	acetolactate synthase small subunit	-0.860508	0.200528	-0.081092	0.911798	0.109723	0.892824	-0.020533	0.984712
CJJ81176_RS02805	Cj0576	UDP-3-O-[3-hydroxymyristoyl] glucosamine N-acyltransferase	-0.403951	0.503188	-0.210468	0.691952	-0.590061	0.261059	-0.704044	0.162059
CJJ81176_RS02810	Cj0577c	S-adenosylmethionine:tRNA ribosyltransferase-isomerase	0.532864	0.512856	0.461929	0.47304	-0.411089	0.580287	-0.555231	0.440861
CJJ81176_RS02815	Cj0578c	sec-independant protein translocase	-0.165066	0.886359	-0.138652	0.854799	-0.61105	0.400406	-0.627011	0.373302
CJJ81176_RS02820	Cj0579c	sec-independant protein translocase	0.395824	0.66964	0.0213023	0.978523	0.298165	0.703421	0.711488	0.307428
CJJ81176_RS02825	Cj0580c	putative oxygen-independent coproporphyrinogen III oxidase	-0.2835	0.881028	0.908788	0.400896	0.705323	0.560507	0.607133	0.630993
CJJ81176_RS02830	Cj0581	putative NUDIX hydrolase family protein	-0.00701346	1	0.798179	0.114976	1.18267	0.0178138	1.08412	0.0303922
CJJ81176_RS02835	Cj0582	aspartokinase, alpha and beta subunits	-0.252023	0.613465	-0.101132	0.816536	-0.0713862	0.889882	-0.318539	0.448694
CJJ81176_RS02840	Cj0583	hypothetical protein Cj0583	0.280804	0.670149	-0.495739	0.289544	-0.78875	0.0957006	-0.909369	0.0442266
CJJ81176_RS02845	Cj0584	hypothetical protein Cj0584	-0.543435	0.636907	-0.0296775	0.975706	-0.566763	0.527002	-0.569936	0.523084
CJJ81176_RS02850	Cj0585	dihydropteroate synthase	1.79018	0.011294	1.93692	0.00160982	0.679656	0.415935	0.859318	0.268286
CJJ81176_RS02855	Cj0586	DNA ligase	1.98191	2.65403e-06	1.92756	1.36678e-06	1.30515	0.00292411	1.33427	0.00196974
CJJ81176_RS02860	Cj0587	putative integral membrane protein	1.95055	0.0887614	1.24395	0.272886	1.20225	0.338357	0.987641	0.444795
CJJ81176_RS02865	Cj0588	putative haemolysin	0.881909	0.410131	1.103	0.196847	0.0948224	0.940401	0.460898	0.66376
CJJ81176_RS02870	Cj0589	putative riboflavin kinase/FMN adenylyltransferase	1.07279	0.283581	1.85086	0.0126486	1.5762	0.0527092	1.40992	0.0877253
CJJ81176_RS02875	Cj0590	putative SAM-dependent methyltransferase	0.909121	0.400254	1.50016	0.0596121	1.15164	0.210185	0.92871	0.322447
CJJ81176_RS02880	Cj0591c	putative lipoprotein	0.776225	0.452266	0.125457	0.905826	0.33963	0.749077	0.192499	0.869851
CJJ81176_RS02885	Cj0592c	putative periplasmic protein	0.323945	0.737915	0.31644	0.659506	-0.121086	0.897135	0.600396	0.41049
CJJ81176_RS02890	Cj0593c	putative integral membrane protein	-0.289408	0.768542	-0.416997	0.534529	-0.721205	0.301752	-0.86904	0.187786
CJJ81176_RS02895	Cj0594c	putative DNA/RNA non-specific endonuclease	-0.255175	0.83226	0.555026	0.425093	0.622026	0.415848	0.480301	0.538398
CJJ81176_RS02900	Cj0595c	endonuclease III	0.0365369	0.990378	0.546999	0.370651	0.263977	0.724445	0.724915	0.252798
CJJ81176_RS02905	Cj0596	major antigenic peptide PEB-cell binding factor	-0.989813	0.181431	-0.777137	0.270065	-0.422358	0.609069	-0.419986	0.620885
CJJ81176_RS02910	Cj0597	fructose-bisphosphate aldolase	0.237709	0.685077	-1.09374	0.00388312	-1.38747	0.000261993	-1.27795	0.000851203
CJJ81176_RS02915	Cj0598	putative membrane protein	0.487419	0.543109	0.630057	0.327294	0.361355	0.629834	0.309536	0.694213
CJJ81176_RS02920	Cj0599	putative OmpA family membrane protein	-0.405685	0.688432	1.05583	0.0738427	0.445372	0.544778	0.633251	0.364106
CJJ81176_RS02925	Cj0600	hypothetical protein Cj0600	-0.0556438	0.990378	0.650165	0.54234	-0.550411	0.65468	-0.00102006	1
CJJ81176_RS02930	Cj0601c	putative sodium-dependent transmembrane transport protein	-0.159151	0.83226	-0.500712	0.264602	-0.348836	0.493864	-0.102001	0.867064
CJJ81176_RS02935	Cj0602c	MOSC-domain containing protein	0.565153	0.652385	0.301293	0.767016	0.199872	0.863144	0.800033	0.405822
CJJ81176_RS02940	Cj0603c	putative thiol:disulphide interchange protein	-1.31164	0.15532	-0.00763151	0.992338	-0.30728	0.758241	-0.482305	0.610476
CJJ81176_RS02950	Cj0605	putative amidohydrolase	-0.302294	0.738536	0.535592	0.370464	0.488146	0.471895	0.338992	0.630993
CJJ81176_RS02955	Cj0606	putative secretion protein HlyD	0.471515	0.528413	-0.383527	0.546288	-0.459612	0.505378	-0.501183	0.461353
CJJ81176_RS02960	Cj0607	ABC-type transmembrane transport protein	0.703595	0.329778	0.72493	0.244125	0.306704	0.686102	0.075525	0.936446
CJJ81176_RS02965	Cj0608	putative outer membrane efflux protein	1.33302	0.093792	0.587508	0.45894	0.542514	0.539299	0.343532	0.715494
CJJ81176_RS02970	Cj0609c	possible periplasmic protein	0.889686	0.223761	0.864261	0.170257	0.87318	0.204688	0.754016	0.276774
CJJ81176_RS02975	Cj0610c	putative periplasmic protein	0.077965	0.95403	0.0557733	0.938997	0.0255118	0.976233	0.0364765	0.968362
CJJ81176_RS02980	Cj0611c	putative acyltransferase family protein	-0.0929765	0.95776	-0.135734	0.88325	0.253475	0.790483	0.0940635	0.934615
CJJ81176_RS02985	Cj0612c	ferritin	-1.96324	0.00176515	-1.44431	0.0207971	0.3323	0.68661	0.306826	0.720423
CJJ81176_RS02990	Cj0613	putative periplasmic phosphate binding protein	1.25533	0.0426691	-0.788405	0.21463	-0.545687	0.453322	-0.851714	0.202529
CJJ81176_RS02995	Cj0614	putative phosphate transport system permease protein	1.78628	0.0135038	0.0848941	0.931455	-1.30251	0.126554	-0.882642	0.312028
CJJ81176_RS03000	Cj0615	putative phosphate transport system permease protein	1.86362	0.00525233	-0.21313	0.812408	-0.977475	0.239331	-0.89783	0.272204
CJJ81176_RS03005	Cj0616	phosphate transport ATP-binding protein	1.83759	0.0518683	1.21699	0.179782	1.09704	0.272913	0.91828	0.370095
CJJ81176_RS03015	Cj0619	putative MATE family transport protein	-0.621404	0.38317	-0.970335	0.0849009	-0.965133	0.107745	-0.966485	0.101594
CJJ81176_RS03020	Cj0620	conserved hypothetical protein Cj0620	-0.28319	0.881028	-0.39804	0.745398	-0.747239	0.550139	-0.350897	0.805645
CJJ81176_RS03025	Cj0621	hypothetical protein Cj0621	1.47075	0.0132275	2.73723	8.57426e-09	2.51917	2.29811e-07	2.70184	1.50571e-08
CJJ81176_RS03030	Cj0622	carbamoyltransferase	1.45774	0.0507983	1.80738	0.0044797	1.04455	0.175172	1.16182	0.112487
CJJ81176_RS03035	Cj0623	hydrogenase isoenzymes formation protein	-1.36389	0.00205362	-0.71278	0.0770512	-0.239741	0.626762	-0.267724	0.592836
CJJ81176_RS03040	Cj0624	hydrogenase isoenzymes formation protein	-0.288944	0.761236	-0.40091	0.544806	-0.0131536	0.98433	-0.29897	0.694213
CJJ81176_RS03045	Cj0625	hydrogenase isoenzymes formation protein	-0.0908429	0.926066	-0.411487	0.417819	-0.438459	0.435929	-0.653829	0.207235
CJJ81176_RS03050	Cj0626	hydrogenase isoenzymes formation protein	0.426403	0.458254	0.318835	0.514995	-0.100146	0.87466	-0.19234	0.744563
CJJ81176_RS03055	Cj0627	hydrogenase expression/formation protein	0.486033	0.675688	0.71698	0.372034	0.146994	0.897135	0.286826	0.778275
CJJ81176_RS03065	Cj0630c	putative DNA polymerase III, delta subunit	-0.33644	0.832911	0.907461	0.313541	0.692846	0.500968	1.18734	0.194516
CJJ81176_RS03070	Cj0631c	putative ribonuclease	-0.0290458	0.994794	0.789388	0.274984	0.904177	0.242108	0.536271	0.525794
CJJ81176_RS03075	Cj0632	ketol-acid reductoisomerase	0.156116	0.708671	-0.404759	0.163549	-0.342675	0.29305	-0.314612	0.337663
CJJ81176_RS03080	Cj0633	putative periplasmic protein	-0.0364437	0.990378	2.05342	0.000125643	1.33283	0.0285443	1.25774	0.039612
CJJ81176_RS03085	Cj0634	DNA processing protein A	0.420229	0.758216	1.40756	0.0899592	0.663015	0.519811	0.574285	0.586245
CJJ81176_RS03090	Cj0635	putative holliday junction resolvase	2.17481	0.0518683	1.53654	0.161633	0.914379	0.484834	1.00303	0.435213
CJJ81176_RS03095	Cj0636	NOL1/NOP2/sun family protein	0.6074	0.679589	1.9105	0.036023	0.728234	0.538132	0.728584	0.537203
CJJ81176_RS03100	Cj0637c	putative peptide methionine sulfoxide reductase	0.604795	0.31112	-0.427513	0.440058	-1.12538	0.032341	-0.818592	0.133442
CJJ81176_RS03105	Cj0638c	inorganic pyrophosphatase	-0.00722328	1	-1.07873	0.0164059	-0.965243	0.0475955	-1.0137	0.0351166
CJJ81176_RS03110	Cj0639c	adenylate kinase	-0.25539	0.615242	-0.432671	0.252581	-0.262231	0.549709	-0.392917	0.349872
CJJ81176_RS03115	Cj0640c	aspartyl-tRNA synthetase	-1.19667	0.000902622	-0.917391	0.00893033	-0.778841	0.0414726	-0.835124	0.026661
CJJ81176_RS03120	Cj0641	putative inorganic polyphosphate/ATP-NAD kinase	0.779487	0.347436	1.23383	0.0559424	0.751262	0.330666	1.23938	0.0701591
CJJ81176_RS03125	Cj0642	putative DNA repair protein	0.798478	0.287362	1.73474	0.000938751	1.28469	0.0285443	1.64333	0.0023045
CJJ81176_RS03130	Cj0643	two-component response regulator	-0.341811	0.679589	0.0521522	0.9464	0.380513	0.577772	0.294915	0.68456
CJJ81176_RS03135	Cj0644	putative TatD-related deoxyribonuclease protein	0.81758	0.24349	0.742304	0.227216	0.52794	0.458341	0.42052	0.565163
CJJ81176_RS03140	Cj0645	putative secreted transglycosylase	0.806416	0.138144	1.12404	0.0106955	0.525023	0.342181	0.686949	0.179617
CJJ81176_RS03145	Cj0646	putative lipoprotein	1.12933	0.00896353	0.79117	0.0573153	0.292466	0.577772	0.217731	0.694213
CJJ81176_RS03150	Cj0647	putative HAD-superfamily hydrolase	2.01545	0.000724089	1.27095	0.0338613	0.726819	0.319026	0.591801	0.424938
CJJ81176_RS03155	Cj0648	putative membrane protein	-0.114891	0.965276	1.82085	0.0245079	1.1473	0.237911	1.12329	0.23871
CJJ81176_RS03160	Cj0649	putative OstA family protein	1.50454	0.0984071	2.88091	1.83938e-05	2.41888	0.000715935	2.58162	0.000193728
CJJ81176_RS03165	Cj0650	putative ATP/GTP binding protein	0.579779	0.688432	2.10184	0.0164059	2.01357	0.0315956	2.31372	0.00976895
CJJ81176_RS03170	Cj0651	putative integral membrane protein	1.58578	0.15416	-0.877945	0.443878	-0.654097	0.60803	-0.99796	0.419341
CJJ81176_RS03175	Cj0652	penicillin-binding protein	1.07204	0.19937	1.19801	0.0991449	0.756212	0.381011	0.60984	0.492632
CJJ81176_RS03180	Cj0653c	putative aminopeptidase	-2.56909	5.22387e-09	-2.01683	1.05811e-07	-1.31087	0.00109616	-1.26311	0.00153646
CJJ81176_RS03190	n/a	di-/tripeptide transporter	0.804486	0.574548	-0.110542	0.94073	-0.653071	0.626139	-0.43692	0.768903
CJJ81176_RS03195	n/a	MFS transporter	-1.01153	0.21356	-0.340652	0.647105	0.425681	0.583312	0.556091	0.464365
CJJ81176_RS03200	Cj0659c	putative periplasmic protein	1.12196	0.36217	-0.697964	0.544806	0.0269432	NA	-0.480355	0.732161
CJJ81176_RS03205	Cj0660c	putative transmembrane protein	1.19974	0.333004	1.22485	0.256086	0.759288	0.545929	0.607472	0.643612
CJJ81176_RS03210	Cj0661c	GTP-binding protein Era homolog	0.641632	0.264875	0.13978	0.820184	-0.727707	0.193407	-0.250206	0.694213
CJJ81176_RS03215	Cj0662c	ATP-dependent Hsl protease ATP-binding subunit	-0.639002	0.287362	-0.642777	0.235573	-0.670811	0.254789	-0.562476	0.354523
CJJ81176_RS03220	Cj0663c	ATP-dependent protease HslV	-0.945643	0.0433425	-1.32872	0.00101259	-0.776892	0.094818	-0.900555	0.0449376
CJJ81176_RS03225	Cj0664c	50S ribosomal protein L9	-0.499028	0.414603	-1.30894	0.00513171	-0.741233	0.182236	-0.912041	0.0837039
CJJ81176_RS03230	Cj0665c	argininosuccinate synthase	-0.633731	0.264875	-1.07133	0.0237881	-0.590276	0.297728	-0.580119	0.308845
CJJ81176_RS03235	Cj0667	putative S4 domain protein	0.366736	0.759177	-0.308689	0.739931	0.558857	0.545929	0.533407	0.574536
CJJ81176_RS03240	Cj0668	putative ATP/GTP-binding protein	0.140212	0.941398	0.592632	0.513244	1.07884	0.237911	0.889388	0.338298
CJJ81176_RS03245	Cj0669	ABC-transporter ATP-binding protein	0.699676	0.340519	0.530969	0.404103	0.473007	0.503879	0.0966682	0.916185
CJJ81176_RS03250	Cj0670	RNA polymerase sigma-54 factor	0.145108	0.928667	0.405349	0.633615	0.138469	0.900271	0.762849	0.376427
CJJ81176_RS03255	Cj0671	anaerobic C4-dicarboxylate transporter	-2.33093	1.4244e-08	-3.76963	3.78237e-22	-3.4449	1.50259e-18	-3.28763	4.21664e-17
CJJ81176_RS03265	Cj0676	ATPase	-0.231801	0.700115	-0.602265	0.13557	-0.615556	0.158703	-0.630781	0.135614
CJJ81176_RS03270	Cj0677	potassium-transporting ATPase B chain	-0.405979	0.39605	-0.746331	0.0475694	-0.918556	0.0178138	-0.748571	0.0614595
CJJ81176_RS03275	Cj0678	potassium transporter KtrA	-0.42088	0.566153	-0.506544	0.343251	-0.326733	0.589133	-0.101559	0.890775
CJJ81176_RS03280	Cj0679	truncated KdpD protein	-0.178381	0.86759	-0.141503	0.845378	0.358029	0.609117	0.149833	0.854479
CJJ81176_RS03285	Cj0680c	excinuclease ABC subunit B	-1.42963	0.0233894	-1.20793	0.0304158	-1.36911	0.0189513	-1.13623	0.0560072
CJJ81176_RS03290	Cj0681	hypothetical protein Cj0681	-0.323866	0.735646	-0.383407	0.593409	0.171596	0.836714	0.652149	0.371096
CJJ81176_RS03295	Cj0682	hypothetical protein Cj0682	-0.75531	0.249061	0.69931	0.128138	0.785055	0.0993413	0.976973	0.0289025
CJJ81176_RS03300	Cj0683	putative periplasmic protein	0.0124148	1	0.413322	0.695955	-1.27288	0.244859	-0.0396624	0.981589
CJJ81176_RS03305	Cj0684	putative primosomal protein N'	0.23496	0.825085	0.085844	0.917385	-0.869273	0.233721	-1.27893	0.0558044
CJJ81176_RS03310	Cj0685c	Invasion protein CipA	0.00556358	1	-0.275617	0.68987	-0.468524	0.519811	-0.111125	0.900084
CJJ81176_RS03315	Cj0686	4-hydroxy-3-methylbut-2-en-1-yl diphosphate synthase	-0.911466	0.00570322	-1.28998	4.96088e-06	-0.919625	0.00208739	-0.770429	0.0113413
CJJ81176_RS03320	Cj0687c	putative flagellar L-ring protein precursor	-1.10538	0.0171089	-1.17088	0.0036825	0.016834	0.979692	-0.0346281	0.960647
CJJ81176_RS03325	Cj0688	putative phosphate acetyltransferase	-2.18443	2.07303e-07	-2.65697	1.862e-11	-1.35273	0.00194611	-1.45047	0.000721167
CJJ81176_RS03330	Cj0689	acetate kinase	-2.37693	8.06878e-10	-2.69789	1.28518e-13	-1.6991	9.64671e-06	-1.82645	1.41181e-06
CJJ81176_RS03335	Cj0690c	putative restriction/modification enzyme	0.0179772	0.997681	-0.328669	0.664224	-0.115154	0.906018	0.0467697	0.966486
CJJ81176_RS03340	Cj0691	putative membrane protein	-0.965436	0.162902	-0.109619	0.878626	-0.511832	0.444377	-0.246858	0.732646
CJJ81176_RS03345	Cj0692c	putative membrane protein	-0.0143681	1	-1.0204	0.250155	-2.07259	0.0192754	-1.88552	0.0301783
CJJ81176_RS03350	Cj0693c	S-adenosyl-methyltransferase	-0.356319	0.748243	0.591714	0.404958	0.248782	0.769086	0.218604	0.816321
CJJ81176_RS03355	Cj0694	putative periplasmic protein	-0.809022	0.0859081	-0.0113239	0.982458	0.250442	0.611862	0.306505	0.534806
CJJ81176_RS03360	Cj0695	cell division protein FtsA	0.00238346	1	-0.454032	0.420535	-0.693952	0.238201	-0.676989	0.249797
CJJ81176_RS03365	Cj0696	cell division protein FfsZ	-0.257796	0.519487	-0.823426	0.00416158	-0.671858	0.032413	-0.72493	0.0182602
CJJ81176_RS03370	Cj0697	flagellar basal-body rod protein	-0.935671	0.0184267	-0.39146	0.296583	0.48008	0.223639	0.322933	0.43832
CJJ81176_RS03375	Cj0698	flagellar basal-body rod protein	-0.145878	0.853151	-0.142808	0.803453	0.0071738	0.988607	-0.254666	0.661862
CJJ81176_RS03380	Cj0699c	glutamine synthetase	-3.46497	7.63332e-10	-4.16501	8.01048e-15	-0.359824	0.645993	-0.381304	0.634499
CJJ81176_RS03385	Cj0700	hypothetical protein Cj0700	-0.753337	0.0529711	-0.39559	0.293829	-0.319373	0.458341	-0.289015	0.50548
CJJ81176_RS03390	Cj0701	putative protease	0.0158848	0.994794	0.445764	0.308834	-0.350965	0.488746	-0.378108	0.449328
CJJ81176_RS03395	Cj0702	phosphoribosylaminoimidazole carboxylase catalytic subunit	0.199509	0.793068	-0.0277818	0.963103	-0.418568	0.474388	-0.555425	0.314658
CJJ81176_RS03400	Cj0703	hypothetical protein Cj0703	-0.196386	0.773249	0.350522	0.431949	-0.0309539	0.9624	-0.24871	0.634499
CJJ81176_RS03405	Cj0704	glycyl-tRNA synthetase alpha chain	-0.0130879	0.997681	-0.247122	0.635019	-0.629735	0.224662	-0.592641	0.249199
CJJ81176_RS03410	Cj0705	conserved hypothetical protein Cj0705	0.854581	0.384306	1.60197	0.0309834	0.878866	0.332908	1.06069	0.218835
CJJ81176_RS03415	Cj0706	conserved hypothetical protein Cj0706	0.697757	0.316052	1.20195	0.0334863	0.960236	0.129537	0.87664	0.17199
CJJ81176_RS03420	Cj0707	3-deoxy-D-manno-octulosonic-acid transferase	1.81443	0.0440066	3.47403	7.6732e-07	2.05671	0.0109384	2.16271	0.00584944
CJJ81176_RS03425	Cj0708	putative ribosomal pseudouridine synthase	0.925409	0.234558	1.61796	0.0057393	0.848248	0.239331	1.01155	0.136478
CJJ81176_RS03430	Cj0709	signal recognition particle protein	0.23989	0.721948	1.41673	0.000261533	0.858812	0.0540828	0.81641	0.0704048
CJJ81176_RS03435	Cj0710	30S ribosomal protein S16	2.03846	0.000306015	0.940434	0.126756	0.764452	0.26886	1.08422	0.0902718
CJJ81176_RS03440	Cj0711	hypothetical protein Cj0711	1.52132	0.00754169	2.14269	1.21233e-05	1.77979	0.000612243	1.89509	0.000175708
CJJ81176_RS03445	Cj0712	putative 16S rRNA processing protein	2.15741	0.000420804	2.2863	6.71648e-05	1.29108	0.0535761	1.09304	0.112356
CJJ81176_RS03450	Cj0713	tRNA (guanine-N1)-methyltransferase	2.18836	0.000224165	2.43414	8.50946e-06	0.799851	0.269852	1.06357	0.111044
CJJ81176_RS03455	Cj0714	50S ribosomal protein L19	1.22462	0.000441204	1.34722	3.64321e-05	0.66188	0.0886489	0.634304	0.1034
CJJ81176_RS03460	Cj0715	transthyretin-like periplasmic protein	-0.0824307	0.95776	1.0791	0.0977357	2.52914	1.61127e-05	2.60916	7.75735e-06
CJJ81176_RS03465	Cj0716	putative phospho-2-dehydro-3-deoxyheptonate aldolase	-0.091179	0.95776	0.77697	0.305936	1.7405	0.0147401	1.72314	0.0153698
CJJ81176_RS03470	Cj0717	putative ArsC family protein	-0.107224	0.938723	1.27667	0.0138067	1.73338	0.000628418	1.87573	0.000132294
CJJ81176_RS03475	Cj0718	DNA polymerase III, alpha chain	-1.59662	4.15034e-05	-0.755637	0.059481	-0.215287	0.675153	-0.307626	0.539341
CJJ81176_RS03480	Cj0719c	conserved hypothetical protein Cj0719c	-1.81865	4.03693e-05	-2.61913	4.01213e-11	-1.84542	4.60257e-06	-1.91123	1.28273e-06
CJJ81176_RS03485	Cj0720c	flagellin	-2.55552	4.01421e-09	-2.76114	3.57648e-11	-0.788602	0.137127	-0.79415	0.130808
CJJ81176_RS03490	Cj0721c	putative integral membrane protein. Functional classification-Membranes, lipoproteins and porins	0.372718	0.564337	0.706959	0.110354	1.3589	0.000783311	1.48928	0.000138034
CJJ81176_RS03495	Cj0722c	putative DNA methylase	0.344119	0.837781	1.71727	0.0527421	1.87673	0.0411896	2.03836	0.0219796
CJJ81176_RS03500	Cj0723c	putative integral membrane zinc-metalloprotease	-0.965477	0.155544	0.628077	0.232596	0.819126	0.128987	0.910392	0.0803103
CJJ81176_RS03505	Cj0724	hypothetical protein Cj0724	-0.72692	0.530816	0.0685057	0.948554	1.36965	0.0836952	1.31582	0.0964586
CJJ81176_RS03510	Cj0725c	molybdopterin biosynthesis protein	-0.719963	0.178526	-1.37395	0.00148656	-0.904147	0.062075	-0.867804	0.0751241
CJJ81176_RS03515	Cj0726c	magnesium and cobalt transport protein	-0.922367	0.0429257	-0.695167	0.0924386	-0.0534438	0.932361	-0.109468	0.85187
CJJ81176_RS03520	Cj0727	putative periplasmic solute-binding protein	1.7611	0.0795164	1.09174	0.260819	0.891496	0.421972	0.834731	0.449328
CJJ81176_RS03525	Cj0728	putative periplasmic protein	0.0623888	0.990378	1.98671	0.0388478	2.14473	0.0315956	2.18618	0.0266184
CJJ81176_RS03530	Cj0729	putative type I phosphodiesterase/nucleotide pyrophosphatase	0.831796	0.539611	1.45097	0.192288	1.22926	0.327723	0.827352	0.535177
CJJ81176_RS03535	Cj0730	putative ABC transport system permease	0.629575	0.581136	0.285247	0.803625	0.154489	NA	0.522568	0.66376
CJJ81176_RS03540	Cj0731	putative ABC transport system permease	0	NA	0.288044	NA	0.554418	NA	0.364256	NA
CJJ81176_RS03545	Cj0732	ABC transport system ATP-binding protein	0.449823	0.782101	0.666019	0.58651	1.00609	0.436543	0.817579	0.538398
CJJ81176_RS03550	Cj0733	putative HAD-superfamily hydrolase	-0.684985	0.605441	-1.68187	0.077207	-2.63647	0.00571556	-1.92282	0.050067
CJJ81176_RS03555	Cj0734c	histidine-binding protein precursor	-0.944165	0.0433425	-0.829091	0.0523208	-0.270583	0.61134	-0.188756	0.742813
CJJ81176_RS03560	Cj0735	putative periplasmic protein	-5.00203	9.05238e-18	-4.82357	3.8688e-27	-4.27766	1.47267e-24	-3.89204	9.9062e-23
CJJ81176_RS03565	Cj0736	hypothetical protein Cj0736	-4.66497	2.78132e-08	-4.65367	5.68994e-10	-4.20441	1.66624e-09	-4.21211	4.7006e-10
CJJ81176_RS03570	n/a	hemagglutination protein	-2.14504	0.0426691	-1.44464	0.142563	-2.33087	0.0189513	-2.33956	0.0156078
CJJ81176_RS03575	n/a	adhesin	-1.90424	0.0692134	-1.08642	0.256522	-1.03681	0.328048	-0.606931	0.588867
CJJ81176_RS03585	n/a	membrane protein	-1.17298	0.318467	-0.742303	0.539384	-1.0333	0.428572	-0.596807	0.670519
CJJ81176_RS03615	n/a	hypothetical protein	0.943815	0.109581	0.100333	0.88325	1.08686	0.0350978	0.997407	0.0572337
CJJ81176_RS03620	Cj0757	putative heat shock regulator	-0.193585	0.860882	-0.212216	0.784536	0.680781	0.352349	0.637071	0.391952
CJJ81176_RS03625	Cj0758	heat shock protein GrpE	0.185696	0.860882	-0.596356	0.368687	-0.085791	0.927205	-0.0887149	0.928191
CJJ81176_RS03630	Cj0759	heat shock protein DnaK	0.873372	0.234393	-0.498141	0.483851	0.202894	0.814935	0.270026	0.759468
CJJ81176_RS03635	n/a	DNA methylase	-0.470621	0.475664	-1.09211	0.0240421	-0.759657	0.164557	-0.418241	0.476482
CJJ81176_RS03640	n/a	type I restriction endonuclease subunit S	0.366043	0.723083	0.644907	0.340898	0.256557	0.76027	0.128657	0.893123
CJJ81176_RS03645	n/a	hypothetical protein	0.225106	0.815952	-0.0686458	0.929651	0.322129	0.630483	-0.0733377	0.932298
CJJ81176_RS03650	n/a	hypothetical protein	-0.220399	0.870467	-1.29115	0.0877382	-0.890806	0.290334	-1.02541	0.201393
CJJ81176_RS03655	n/a	DEAD/DEAH box helicase	0.233539	0.746821	-0.688107	0.166277	-0.64381	0.238201	-0.390527	0.504254
CJJ81176_RS03660	Cj0760	hypothetical protein Cj0760	0.107775	0.947846	1.13278	0.0759571	-0.496502	0.550139	-0.187434	0.842204
CJJ81176_RS03665	Cj0761	hypothetical protein Cj0761	1.46912	0.143132	0.522992	0.608254	1.22643	0.209671	1.49341	0.0990145
CJJ81176_RS03670	Cj0762c	aspartate aminotransferase	-1.83915	7.31118e-05	-2.2422	2.81316e-07	-1.44253	0.00233109	-1.43355	0.00245253
CJJ81176_RS03675	Cj0763c	serine acetyltransferase	0.131056	0.928717	0.237164	0.768351	0.0657013	0.946702	0.0704448	0.944837
CJJ81176_RS03680	Cj0764c	biosynthetic arginine decarboxylase	-0.0407964	0.966627	-0.193216	0.617233	-0.437015	0.259883	-0.441406	0.246675
CJJ81176_RS03685	Cj0765c	histidyl-tRNA synthetase	-0.110502	0.901498	0.214206	0.672976	0.324247	0.54192	0.138439	0.827076
CJJ81176_RS03690	Cj0766c	thymidylate kinase	-0.617997	0.476067	0.630491	0.280144	0.410224	0.544437	0.354482	0.607972
CJJ81176_RS03695	Cj0767c	phosphopantetheine adenylyltransferase	-1.34123	0.04121	-0.211183	0.739245	0.0621834	0.938789	0.122472	0.874627
CJJ81176_RS03700	Cj0768c	putative decarboxylase	-0.00459268	1	0.776466	0.333654	0.432785	0.648042	0.320969	0.752386
CJJ81176_RS03705	Cj0769c	putative flagellar protein FlgA	0.655986	0.564337	2.05272	0.00256612	1.92762	0.00752578	1.98134	0.00494212
CJJ81176_RS03710	Cj0770c	putative NLPA family lipoprotein	-1.80976	0.00109695	-0.943883	0.0730901	-0.119831	0.871759	-0.410575	0.525794
CJJ81176_RS03715	Cj0771c	putative NLPA family lipoprotein	-1.85464	1.12797e-05	-0.781676	0.0573153	-0.0384403	0.951281	-0.252321	0.633039
CJJ81176_RS03720	Cj0772c	putative NLPA family lipoprotein	-1.17384	0.0241402	-1.5901	0.000695339	-0.610442	0.301623	-0.643724	0.270607
CJJ81176_RS03725	Cj0773c	putative binding-protein dependent transport system permease protein	-0.550583	0.272703	-0.777506	0.0533752	-1.12629	0.00492287	-1.15561	0.00300448
CJJ81176_RS03730	Cj0774c	ABC transport system ATP-binding protein	0.122848	0.847512	0.284539	0.459976	-0.17657	0.698115	-0.0467581	0.932298
CJJ81176_RS03735	Cj0775c	valyl-tRNA synthetase	0.0594137	0.937334	-0.196304	0.619921	-0.291115	0.489306	-0.266448	0.535039
CJJ81176_RS03740	Cj0776c	putative periplasmic protein	-0.661081	0.144246	-0.566004	0.163313	0.0481334	0.938789	0.235659	0.634499
CJJ81176_RS03745	Cj0777	putative ATP-dependent DNA helicase	1.11952	0.138888	2.2852	3.78398e-05	1.47938	0.0193915	1.38905	0.0282451
CJJ81176_RS03750	Cj0778	major antigenic peptide PEB2	-0.0668937	0.981131	0.244457	0.812408	0.456627	0.654915	0.457974	0.66376
CJJ81176_RS03755	Cj0779	thiol peroxidase	0.493013	0.512206	0.692365	0.262466	1.47237	0.0113493	1.22856	0.0419394
CJJ81176_RS03760	Cj0780	periplasmic nitrate reductase	-2.17073	0.000808733	-3.93644	2.0792e-11	-3.37208	2.18789e-08	-3.57834	2.06917e-09
CJJ81176_RS03765	Cj0781	putative ferredoxin	-1.42963	0.00721793	-4.74206	1.35795e-24	-5.00462	7.35729e-27	-5.04607	7.35445e-28
CJJ81176_RS03770	Cj0782	putative ferredoxin	-1.89165	0.000250898	-4.33606	5.59596e-20	-4.69312	7.18516e-23	-5.0841	5.75417e-27
CJJ81176_RS03775	Cj0783	periplasmic nitrate reductase small subunit (cytochrome C-type protein)	-1.94983	2.23202e-06	-4.10604	4.93375e-26	-4.12079	4.95351e-26	-4.21276	7.35445e-28
CJJ81176_RS03780	Cj0784	putative periplasmic protein	-0.0961535	0.960451	-0.714035	0.395485	-0.633314	0.497304	-0.90775	0.308845
CJJ81176_RS03785	Cj0785	NapD protein homolog	1.06187	0.325134	0.419547	0.689389	0.257193	0.832086	0.803547	0.45347
CJJ81176_RS03790	Cj0786	small hydrophobic protein	0.0979721	0.977386	-0.849123	0.474375	-1.08682	0.403733	-0.625005	0.654833
CJJ81176_RS03795	Cj0787	conserved hypothetical protein Cj0787	0.0486508	0.990378	1.03948	0.203324	1.09839	0.217034	1.70154	0.0302817
CJJ81176_RS03800	Cj0788	hypothetical protein Cj0788	-0.209283	0.878277	-0.107528	0.91381	-0.0408717	0.971203	0.110971	0.926625
CJJ81176_RS03805	Cj0789	putative multifunctional Cca protein	0.440877	0.667898	0.747134	0.286059	-0.8106	0.319026	-0.14832	0.883327
CJJ81176_RS03810	Cj0790	formyltetrahydrofolate deformylase	-0.301562	0.786551	0.244833	0.751626	0.314538	0.701463	-0.148744	0.874713
CJJ81176_RS03815	Cj0791c	putative aminotransferase	-0.154482	0.896126	-0.0433672	0.955487	-0.0621057	0.944862	0.0421273	0.968099
CJJ81176_RS03820	Cj0792	conserved hypothetical protein Cj0792	-0.624417	0.684675	0.674905	0.570443	0.8752	0.493718	0.687783	0.60649
CJJ81176_RS03825	Cj0793	signal transduction histidine kinase	-0.411424	0.69133	-0.743308	0.29594	-0.0542066	0.956637	-3.82355e-05	1
CJJ81176_RS03830	Cj0794	hypothetical protein Cj0794	0.530092	0.692924	-0.600192	0.561118	-0.667315	0.546824	-1.66169	0.0964586
CJJ81176_RS03835	Cj0795c	UDP-N-acetylmuramoyl-tripeptide D-alanyl-D-alanine ligase	-0.89425	0.156626	-0.950789	0.0639808	-0.473075	0.438514	-0.324494	0.607089
CJJ81176_RS03840	Cj0796c	putative hydrolase	-1.31888	0.102895	-0.155429	0.845918	0.176378	0.834107	0.411426	0.598572
CJJ81176_RS03845	Cj0797c	hypothetical protein Cj0797c	0.108341	0.95776	0.191606	0.850534	0.740757	0.435929	0.632329	0.5135
CJJ81176_RS03850	Cj0798c	D-alanine--D-alanine ligase	-0.970676	0.112922	-0.301009	0.597042	-0.0890515	0.904461	-0.0281648	0.974636
CJJ81176_RS03855	Cj0799c	putative Holliday junction ATP-dependent DNA helicase	-0.479297	0.636907	-1.02175	0.151679	-1.03506	0.179918	-1.04956	0.162951
CJJ81176_RS03860	Cj0800c	putative ATPase	-0.0381315	0.990378	0.460943	0.431949	0.571022	0.36498	0.308552	0.652298
CJJ81176_RS03865	Cj0801	putative integral membrane protein (MviN homolog)	0.0705324	0.980441	0.639339	0.450172	0.072242	0.951281	0.29926	0.777004
CJJ81176_RS03870	Cj0802	cysteinyl-tRNA synthetase	-0.35308	0.733042	0.45872	0.540493	0.591568	0.471399	0.511907	0.537715
CJJ81176_RS03875	Cj0803	lipid export ABC transport protein	-0.0658178	0.956548	0.170324	0.758998	-0.0779303	0.910475	-0.119142	0.856051
CJJ81176_RS03880	Cj0804	dihydroorotate dehydrogenase	-0.79218	0.110262	-0.0851191	0.876438	-0.00732815	0.987493	0.127361	0.831043
CJJ81176_RS03885	Cj0805	putative zinc protease	-0.372933	0.505326	0.813227	0.0245235	0.309145	0.503226	0.490214	0.248864
CJJ81176_RS03890	Cj0806	dihydrodipicolinate synthase	0.536508	0.132594	-0.622854	0.052616	-0.582845	0.0925437	-0.58818	0.0869177
CJJ81176_RS03895	Cj0807	putative oxidoreductase	0.330336	0.386351	-0.0628773	0.878389	-0.125395	0.759929	0.0379344	0.936491
CJJ81176_RS03900	Cj0808c	small hydrophobic protein	1.1679	0.116814	-0.686611	0.367023	-1.00474	0.211026	-0.515312	0.538978
CJJ81176_RS03905	Cj0809c	putative hydrolase	-2.21338	0.00153794	-0.595555	0.317194	-0.262378	0.714205	-0.0893142	0.916583
CJJ81176_RS03910	Cj0810	NH(3)-dependent NAD(+) synthetase	0.979303	0.108634	1.04623	0.0370895	1.52158	0.00152861	1.27398	0.00999265
CJJ81176_RS03915	Cj0811	tetraacyldisaccharide 4'-kinase	0.94476	0.195694	0.516078	0.450373	0.644819	0.381011	0.449096	0.559542
CJJ81176_RS03920	Cj0812	threonine synthase. Functional classification-Amino acid biosynthesis-Aspartate family	0.0545379	0.968217	0.310243	0.54946	0.619599	0.238027	0.599182	0.25051
CJJ81176_RS03925	Cj0813	3-deoxy-manno-octulosonate cytidylyltransferase	1.22744	0.0736474	0.551333	0.430369	0.727872	0.32846	0.680779	0.363043
CJJ81176_RS03930	n/a	hypothetical protein	-1.60408	0.00160494	-1.70627	2.24574e-05	-0.613873	0.182394	-0.69412	0.110638
CJJ81176_RS03935	Cj0817	putative glutamine binding periplasmic protein	-0.324151	0.59651	0.618564	0.155863	1.39007	0.000437593	1.27947	0.00130616
CJJ81176_RS03940	Cj0820c	flagellar biosynthesis protein	0.395442	0.586939	0.682075	0.183271	0.157885	0.814059	0.51103	0.378279
CJJ81176_RS03945	Cj0821	UDP-N-acetylglucosamine pyrophosphorylase	-0.72798	0.314744	-0.179062	0.815667	0.268967	0.74005	0.180026	0.839124
CJJ81176_RS03950	Cj0822	phosphopantothenoylcysteine decarboxylase	0.0461234	0.980441	-0.259751	0.671143	0.0393629	0.9624	-0.0119995	0.994998
CJJ81176_RS03955	Cj0823	hypothetical protein Cj0823	1.49515	0.137669	1.59737	0.067377	0.975443	0.351305	0.881402	0.407723
CJJ81176_RS03960	Cj0824	undecaprenyl diphosphate synthase	-0.316014	0.783187	-0.394139	0.635902	-0.354544	0.703077	-0.500548	0.582121
CJJ81176_RS03965	Cj0825	putative processing peptidase	0.714332	0.553665	0.0715371	0.950641	0.191317	0.8751	-0.330095	0.780986
CJJ81176_RS03970	Cj0826	putative integral membrane protein	0.516969	0.646254	0.370594	0.677246	0.17745	0.870974	0.129903	0.913299
CJJ81176_RS03975	Cj0827	tRNA pseudouridine synthase	0.115111	0.95776	0.158413	0.88325	0.254288	0.81879	-0.972856	0.331602
CJJ81176_RS03980	Cj0828c	threonine dehydratase biosynthetic	-0.517129	0.426298	-0.30214	0.59409	-0.294592	0.630774	-0.31826	0.610476
CJJ81176_RS03985	Cj0829c	putative CoA binding domain containing protein	-0.936806	0.456083	0.620886	0.536736	0.270042	0.822793	-0.128368	0.928191
CJJ81176_RS03990	Cj0830	putative integral membrane protein	-0.0302435	0.989268	-0.146577	0.773209	0.326176	0.508626	0.251617	0.621541
CJJ81176_RS03995	Cj0831c	tRNA (uracil-5-)-methyltransferase	-0.208906	0.860882	-0.322556	0.673355	-0.564069	0.484834	-0.882258	0.236475
CJJ81176_RS04000	Cj0832c	putative Na+/H+ antiporter family protein	-0.723183	0.314284	-1.3609	0.0207796	-1.68645	0.00460338	-1.71563	0.00355787
CJJ81176_RS04005	Cj0833c	putative oxidoreductase	-1.83479	0.00337437	-1.86572	0.00110252	-1.56535	0.0108234	-1.70723	0.00410692
CJJ81176_RS04010	Cj0834c	ankyrin repeat-containing putative periplasmic protein	-1.87157	4.93542e-06	-1.33907	0.00024126	-1.54327	2.65776e-05	-1.58505	1.02927e-05
CJJ81176_RS04015	Cj0835c	aconitate hydratase	-2.112	2.77082e-07	-3.16242	3.85239e-16	-1.83348	9.57695e-06	-2.03819	5.60728e-07
CJJ81176_RS04020	Cj0836	methylated-DNA--protein-cysteine methyltransferase	0.343101	0.821614	1.0194	0.263372	1.18447	0.224662	1.04689	0.286588
CJJ81176_RS04025	Cj0837c	conserved hypothetical protein Cj0837c	0.936039	0.339693	0.956209	0.244567	0.427542	0.670245	0.369315	0.721049
CJJ81176_RS04030	Cj0838c	methionyl-tRNA synthetase	-0.06518	0.941398	0.325537	0.456668	0.28776	0.551293	0.247761	0.622499
CJJ81176_RS04035	Cj0839c	hypothetical protein Cj0839c	-0.755057	0.477479	-1.41966	0.077207	-1.05691	0.237911	-0.920212	0.300599
CJJ81176_RS04040	Cj0840c	fructose-1,6-bisphosphatase	-0.865386	0.103782	-0.406334	0.401898	0.0491028	0.940401	-0.0963379	0.884215
CJJ81176_RS04045	Cj0841c	putative molybdopterin-guanine dinucleotide biosynthesis protein	-0.482595	0.613465	0.0968045	0.906471	-0.479599	0.53851	0.273701	0.740226
CJJ81176_RS04050	Cj0842	putative lipoprotein	0.191668	0.918781	1.12817	0.214551	1.51211	0.0992278	1.36544	0.143436
CJJ81176_RS04055	Cj0843c	putative secreted transglycosylase	0.525	0.384099	0.310153	0.569982	-0.074923	0.917095	0.248891	0.694213
CJJ81176_RS04060	Cj0844c	putative integral membrane protein	0.227397	0.84118	-0.245439	0.748327	-0.64763	0.404036	-0.657132	0.381592
CJJ81176_RS04065	Cj0845c	glutamyl-tRNA synthetase	0.111946	0.83226	-0.0944825	0.806131	-0.360656	0.312755	-0.257122	0.487323
CJJ81176_RS04070	Cj0846	putative metallophosphoesterase	0.457524	0.51855	1.38078	0.00179506	0.717312	0.189503	0.754781	0.15064
CJJ81176_RS04075	Cj0847	phosphatidylserine decarboxylase proenzyme	1.31767	0.0228105	1.82837	0.000125371	1.45466	0.0047495	1.52327	0.00236908
CJJ81176_RS04080	Cj0848c	conserved hypothetical protein Cj0848c	1.10757	0.358024	1.19087	0.242566	0.645915	0.589133	0.738697	0.538398
CJJ81176_RS04085	Cj0849c	conserved hypothetical protein Cj0849c	1.01867	0.174543	0.781404	0.243322	-0.518441	0.52853	0.095494	0.926625
CJJ81176_RS04090	Cj0850c	putative MFS (Major Facilitator Superfamily) transport protein	-0.425762	0.636907	0.325501	0.619138	-0.423846	0.551293	-0.383121	0.598572
CJJ81176_RS04095	Cj0851c	putative integral membrane protein	-0.17574	0.93231	-0.0703229	0.952604	-1.03712	0.351305	-0.916398	0.411468
CJJ81176_RS04100	Cj0852c	putative integral membrane protein	-0.124567	0.897802	-1.57744	0.000972781	-1.71401	0.000460496	-1.86204	7.67393e-05
CJJ81176_RS04105	Cj0853c	glutamate-1-semialdehyde 2,1-aminomutase	-1.82524	1.42728e-07	-2.03483	3.00352e-10	-1.54692	3.96846e-06	-1.61905	9.61593e-07
CJJ81176_RS04110	Cj0854c	putative periplasmic protein	-1.49693	0.02093	-0.574573	0.321942	-0.518142	0.42909	-0.0605882	0.941036
CJJ81176_RS04115	Cj0855	methylenetetrahydrofolate dehydrogenase/methenyltetrahydrofolate cyclohydrolase	1.62761	0.00425238	1.20762	0.031116	0.662451	0.329993	0.703265	0.292016
CJJ81176_RS04120	Cj0856	signal peptidase I	1.75842	8.72688e-06	1.26198	0.00120509	0.613724	0.207013	0.776834	0.0837039
CJJ81176_RS04125	Cj0857c	putative molybdopterin biosynthesis protein	0.0956015	0.924657	0.0535205	0.931358	-0.41123	0.472217	-0.0830142	0.905412
CJJ81176_RS04130	Cj0858c	UDP-N-acetylglucosamine 1-carboxyvinyltransferase	-0.821778	0.0750385	-0.643557	0.122155	-0.591257	0.197935	-0.767207	0.0735715
CJJ81176_RS04135	Cj0859c	hypothetical protein Cj0859c	-0.158884	0.854006	-0.707288	0.159885	0.0787614	0.912904	0.0087382	0.998129
CJJ81176_RS04140	Cj0860	putative integral membrane protein	0.303409	0.782434	0.545659	0.441444	0.716358	0.338774	0.732237	0.317186
CJJ81176_RS04145	Cj0861c	para-aminobenzoate synthase glutamine amidotransferase component II	0.235573	0.906501	0.952092	0.395823	0.182593	0.90681	-0.151199	0.928191
CJJ81176_RS04150	Cj0862c	para-aminobenzoate synthase component I	0.99745	0.358024	1.28363	0.142624	0.356578	0.758913	0.838844	0.413097
CJJ81176_RS04155	Cj0863c	DNA recombinase	-0.287779	0.824587	0.50648	0.531163	0.377885	0.681128	0.127346	0.908745
CJJ81176_RS04160	n/a	thiol:disulfide interchange protein DsbA	-3.63952	3.51407e-09	-3.22283	1.05851e-10	-2.09647	2.73364e-05	-2.17406	8.81717e-06
CJJ81176_RS04165	Cj0865	putative disulphide oxidoreductase	-3.08742	9.38142e-07	-3.07684	6.70356e-09	-3.00447	1.2955e-08	-3.3654	8.43952e-11
CJJ81176_RS04170	Cj0866	aryl-sulfate sulfotransferase	-3.39547	4.45062e-11	-4.2164	7.18978e-18	-3.60378	2.43958e-13	-3.60384	1.88044e-13
CJJ81176_RS04175	Cj0872	putative protein disulphide isomerase	-1.38512	0.0198613	-0.36173	0.522767	0.487383	0.415749	0.570176	0.317928
CJJ81176_RS04180	n/a	cytochrome c	-1.9673	6.13021e-06	-3.31109	1.9159e-16	-2.10426	9.49268e-08	-2.32312	1.6286e-09
CJJ81176_RS04185	n/a	cytochrome c	-2.32845	6.86943e-06	-3.22851	2.42918e-11	-1.65589	0.0017893	-1.83964	0.000373436
CJJ81176_RS04195	Cj0878	hypothetical protein Cj0878	-0.0135181	1	1.90257	0.036952	1.93751	0.0441484	2.42542	0.00730271
CJJ81176_RS04200	Cj0879c	putative periplasmic protein	-0.0470431	0.990378	0.340891	0.692586	-0.903482	0.319026	-0.066398	0.957814
CJJ81176_RS04205	Cj0880c	hypothetical protein Cj0880c	1.41822	0.195638	2.65204	0.00110252	2.21068	0.012733	1.67464	0.0762918
CJJ81176_RS04210	Cj0881c	hypothetical protein Cj0881c	0.913526	0.267225	1.79252	0.00278883	1.36424	0.04165	1.17794	0.0869177
CJJ81176_RS04215	Cj0882c	flagellar biosynthesis protein	0.676287	0.279802	0.418656	0.47304	-0.352375	0.591925	-0.361046	0.592948
CJJ81176_RS04220	Cj0883c	putative transcriptional regulator	0.233231	0.800874	0.908662	0.0814365	0.747899	0.206699	0.955169	0.0792052
CJJ81176_RS04225	Cj0884	30S ribosomal protein S15	1.1965	0.208579	1.87316	0.020749	1.68935	0.0535115	2.23039	0.00657696
CJJ81176_RS04230	Cj0886c	putative cell division protein	1.19694	0.00256443	1.00358	0.00808142	0.28665	0.564925	0.449119	0.341533
CJJ81176_RS04235	Cj0887c	putative flagellin	-0.619216	0.11085	-0.878843	0.00791946	-0.410734	0.313235	-0.432894	0.278209
CJJ81176_RS04250	Cj0888c	ABC transport system ATP-binding protein	1.22257	0.129254	1.55641	0.0183048	1.39445	0.051222	1.35089	0.0601017
CJJ81176_RS04255	Cj0889c	putative sensory trasnduction histidine kinase	0.515568	0.724161	0.981701	0.319087	0.299415	0.812582	0.710548	0.535039
CJJ81176_RS04260	Cj0890c	putative sensory transduction transcriptional regulator	0.217346	0.82353	0.84397	0.128138	0.47377	0.480812	0.757206	0.208179
CJJ81176_RS04265	Cj0891c	D-3-phosphoglycerate dehydrogenase	0.877655	0.0451648	0.487025	0.271735	-0.0502579	0.938789	-0.00840537	0.996973
CJJ81176_RS04270	Cj0892c	putative periplasmic protein	1.03153	0.144593	0.425037	0.556063	-0.137053	0.883499	-0.0778629	0.936934
CJJ81176_RS04275	Cj0893c	30S ribosomal protein S1	-0.242639	0.692557	-0.0495939	0.931183	0.0137205	0.980269	0.00518006	1
CJJ81176_RS04280	Cj0894c	4-hydroxy-3-methylbut-2-enyl diphosphate reductase	0.513658	0.458254	1.23616	0.00828034	0.443934	0.474388	0.414757	0.500767
CJJ81176_RS04285	Cj0895c	3-phosphoshikimate 1-carboxyvinyltransferase	0.546219	0.253259	1.00711	0.0044328	0.27737	0.556292	0.480837	0.268286
CJJ81176_RS04290	Cj0896c	phenylalanyl-tRNA synthetase beta chain	0.613258	0.0652648	0.984293	0.000319876	0.769145	0.00995554	0.775545	0.00811491
CJJ81176_RS04295	Cj0897c	phenylalanyl-tRNA synthetase alpha chain	0.485388	0.283581	0.686086	0.0675775	0.35527	0.438514	0.445555	0.311325
CJJ81176_RS04300	Cj0898	putative histidine triad (HIT) family protein	-1.58015	0.0045315	-0.218329	0.685127	0.991783	0.0311553	1.00186	0.0277545
CJJ81176_RS04305	Cj0899c	4-methyl-5(beta-hydroxyethyl)-thiazole monophosphate synthesis protein	-1.32571	0.0518683	-0.241609	0.719399	-0.0297494	0.973819	-0.0990069	0.910174
CJJ81176_RS04310	Cj0900c	small hydrophobic protein	-0.0813326	0.983652	0.74659	0.533349	0.393281	0.778195	0.15106	0.928191
CJJ81176_RS04315	Cj0901	putative amino acid ABC tansporter permease protein	-1.17156	0.187743	-0.156337	0.860391	-0.731183	0.382621	-0.536144	0.532631
CJJ81176_RS04320	Cj0902	putative glutamine transport ATP-binding protein	-0.43628	0.616909	-0.739328	0.236153	-0.657171	0.342181	-0.586356	0.39709
CJJ81176_RS04325	Cj0903c	putative amino-acid transport protein	-2.31986	2.18651e-15	-2.74902	5.33759e-24	-1.0046	0.000793556	-0.856078	0.00537111
CJJ81176_RS04330	Cj0904c	putative RNA methylase	0.265608	0.863414	0.591192	0.52404	-0.646675	0.54192	-0.437575	0.694213
CJJ81176_RS04335	Cj0905c	alanine racemase	1.44254	0.110262	2.70961	9.79333e-05	1.50601	0.0676359	1.13354	0.193
CJJ81176_RS04340	Cj0906c	putative periplasmic protein	0.476131	0.411963	1.65751	1.70332e-05	1.261	0.0023581	1.13256	0.0071762
CJJ81176_RS04345	Cj0908	putative periplasmic protein	-1.54312	0.171428	-1.15164	0.31671	-1.06207	0.415749	-1.47892	0.226512
CJJ81176_RS04350	Cj0909	putative periplasmic protein	-2.88931	4.15822e-11	-2.85059	7.17068e-14	-2.59196	9.92455e-12	-2.36782	2.75291e-10
CJJ81176_RS04355	Cj0910	putative periplasmic protein	-1.49563	0.0649279	-2.28689	0.000968491	-2.88172	3.7504e-05	-2.74593	6.50305e-05
CJJ81176_RS04360	Cj0911	putative periplasmic protein	0.0161896	0.998153	-0.240159	0.781315	-0.484566	0.574029	-0.163032	0.874627
CJJ81176_RS04370	Cj0913c	DNA-binding protein HU homolog	-1.17225	0.0237295	-0.520414	0.339309	0.203207	0.76027	0.449615	0.468968
CJJ81176_RS04375	Cj0914c	CiaB protein	0.162594	0.872649	1.55173	0.00141407	1.90182	8.59747e-05	1.89006	8.24492e-05
CJJ81176_RS04380	Cj0915	putative hydrolase	-0.0819024	0.968987	0.361568	0.669038	-0.0641045	0.954196	-0.0335604	0.980523
CJJ81176_RS04385	Cj0916c	conserved hypothetical protein Cj0916c	-1.14346	0.147249	-0.757362	0.231634	0.443704	0.519811	0.570033	0.389537
CJJ81176_RS04390	Cj0917c	putative integral membrane protein (CstA homolog)	-1.46867	0.0649425	-3.00797	8.15397e-06	-1.88173	0.0125843	-1.89615	0.0113413
CJJ81176_RS04395	Cj0918c	ribose-phosphate pyrophosphokinase	-0.576362	0.140522	-0.91081	0.00572513	-0.711503	0.050929	-0.751935	0.0364903
CJJ81176_RS04400	Cj0919c	putative ABC-type amino-acid transporter permease protein	-2.50246	1.96471e-12	-2.29509	3.17249e-14	-1.50365	1.03259e-06	-1.60141	1.05249e-07
CJJ81176_RS04405	Cj0920c	putative ABC-type amino-acid transporter permease protein	-2.82143	1.43342e-11	-3.40214	7.698e-18	-2.02529	9.89571e-07	-2.15694	1.33429e-07
CJJ81176_RS04410	Cj0921c	aspartate/glutamate-binding ABC transporter protein	-2.87307	1.83193e-10	-3.35919	7.20597e-15	-1.19641	0.0193915	-1.51683	0.00167617
CJJ81176_RS04415	Cj0922c	ABC-type amino-acid transporter ATP-binding protein	-1.73726	0.000135434	-2.513	2.21293e-09	-1.1459	0.0187642	-1.12098	0.0204737
CJJ81176_RS04420	Cj0923c	putative MCP protein methyltransferase	-0.829402	0.298	0.415501	0.505851	-0.245299	0.749077	-0.171096	0.834439
CJJ81176_RS04425	Cj0924c	putative MCP protein-glutamate methylesterase	-0.95915	0.108419	0.145115	0.815667	0.913525	0.0770417	0.922201	0.0729265
CJJ81176_RS04430	Cj0925	ribose 5-phosphate isomerase	0.0909424	0.941152	-0.506035	0.4061	-0.259679	0.720839	-0.0451512	0.960647
CJJ81176_RS04435	Cj0926	putative membrane protein	-1.21456	0.218442	0.222748	0.822941	0.472183	0.629964	0.258667	0.821347
CJJ81176_RS04440	Cj0927	adenine phosphoribosyltransferase	-0.687064	0.318467	0.541789	0.318484	0.521886	0.393764	0.576939	0.326651
CJJ81176_RS04445	Cj0928	putative integral membrane protein (dedA family)	-0.0858246	0.935769	0.550457	0.2501	0.293647	0.604454	0.446712	0.409009
CJJ81176_RS04450	Cj0929	aminopeptidase	-0.108518	0.853968	-0.349891	0.324543	-0.431672	0.258941	-0.438509	0.244538
CJJ81176_RS04455	Cj0930	putative GTP-binding protein	0.17062	0.745369	-0.807847	0.0147976	-0.7606	0.0315956	-0.780994	0.0240974
CJJ81176_RS04460	Cj0931c	argininosuccinate lyase	-0.443356	0.402494	-0.104783	0.845378	-0.220436	0.683137	-0.187437	0.740876
CJJ81176_RS04465	Cj0932c	phosphoenolpyruvate carboxykinase (ATP)	-0.729095	0.251493	-0.704883	0.224919	-0.335831	0.624022	-0.454808	0.504086
CJJ81176_RS04470	Cj0933c	putative pyruvate carboxylase B subunit	-0.584411	0.227312	-0.316041	0.493591	-0.132871	0.812771	-0.098152	0.874627
CJJ81176_RS04475	Cj0934c	putative sodium:amino-acid symporter family protein	-0.851734	0.200354	-1.03137	0.0543648	-0.275297	0.681128	-0.323434	0.626858
CJJ81176_RS04480	Cj0935c	putative sodium:amino-acid symporter family protein	-1.64929	0.00194111	-0.0641387	0.910679	1.21921	0.00198691	1.10929	0.00543653
CJJ81176_RS04485	Cj0936	ATP synthase F0 sector C subunit	0.467373	0.399715	-0.176232	0.748327	-0.784922	0.110058	-0.501485	0.351269
CJJ81176_RS04495	n/a	hypothetical protein	-0.815527	0.519487	-3.18926	0.000562005	-2.71611	0.00478384	-2.86036	0.00238562
CJJ81176_RS04500	n/a	hypothetical protein	0.668328	0.636907	1.66082	0.0608303	2.84173	0.00049542	3.16346	5.54812e-05
CJJ81176_RS04505	n/a	hypothetical protein	0.687846	0.406187	-0.20575	0.803656	0.95241	0.168931	1.21812	0.0579746
CJJ81176_RS04510	n/a	hypothetical protein	0.33703	0.800874	-1.93072	0.0245235	-1.92269	0.0325849	-2.15318	0.0131791
CJJ81176_RS04515	n/a	hypothetical protein	0	NA	0.560742	NA	0	NA	0.337639	NA
CJJ81176_RS04520	n/a	conjugal transfer protein TraG	0.231028	0.884891	-1.98606	0.024355	-2.02086	0.0278094	-1.10579	0.253477
CJJ81176_RS04525	n/a	hypothetical protein	1.36055	0.256089	-0.196338	0.88325	-0.72579	0.568417	-0.188765	0.908745
CJJ81176_RS04530	Cj0937	putative integral membrane protein	-0.223802	0.900746	0.424291	0.67259	-0.637696	0.556821	-0.704989	0.520055
CJJ81176_RS04535	Cj0938c	putative 2-acylglycerophosphoethanolamine acyltransferase / acyl-acyl carrier protein synthetase	0.131317	0.878277	0.333565	0.499844	0.512122	0.325704	0.313386	0.574536
CJJ81176_RS04540	Cj0939c	hypothetical protein Cj0939c	0.293493	0.870467	0.744846	0.479899	1.83851	0.0564071	1.09568	0.313965
CJJ81176_RS04580	Cj0940c	putative glutamine transport system permease	-0.628952	0.650075	0.592338	0.540174	-0.374149	0.751397	0.323774	0.782492
CJJ81176_RS04585	Cj0941c	putative permease	0.605226	0.314359	0.756187	0.12167	-0.282328	0.648042	-0.078073	0.919164
CJJ81176_RS04590	Cj0942c	preprotein translocase SecA subunit	0.491473	0.163364	-0.0757486	0.850108	-0.249256	0.519811	-0.285132	0.454485
CJJ81176_RS04595	Cj0943	putative outer-membrane lipoprotein carrier protein precursor	0.414928	0.702072	-1.1436	0.13557	-0.0279461	0.979757	0.246751	0.808583
CJJ81176_RS04600	Cj0944c	putative periplasmic protein	0.361883	0.738402	0.490546	0.510275	0.24458	0.780856	0.507616	0.535039
CJJ81176_RS04605	Cj0945c	putative helicase	0.73823	0.402046	0.901631	0.192288	0.884097	0.239142	0.990762	0.168564
CJJ81176_RS04610	Cj0946	putative lipoprotein	1.70721	0.0428346	2.42572	0.000444625	1.44827	0.075429	1.3689	0.0922731
CJJ81176_RS04615	Cj0947c	putative carbon-nitrogen hydrolase	1.41318	0.0160576	1.29079	0.0140663	0.807087	0.200453	0.811705	0.182778
CJJ81176_RS04620	Cj0948c	putative cation efflux family protein	0.137455	0.934022	1.54635	0.0145304	0.581785	0.484834	0.680723	0.395971
CJJ81176_RS04625	Cj0949c	putative peptidyl-arginine deiminase family protein	0.374302	0.724161	1.01688	0.151679	0.129118	0.90139	0.0391749	0.974636
CJJ81176_RS04630	Cj0950c	putative lipoprotein	-0.629119	0.180546	0.154308	0.752219	0.259663	0.604622	0.468236	0.317928
CJJ81176_RS04635	n/a	membrane protein	-1.54027	0.000891197	-1.59532	0.000161147	-1.64983	0.000136214	-1.71334	5.02224e-05
CJJ81176_RS04640	Cj0953c	phosphoribosylaminoimidazolecarboxamide formyltransferase / IMP cyclohydrolase	1.76522	1.42721e-05	1.71105	8.73813e-06	0.867292	0.0569367	0.870297	0.0558044
CJJ81176_RS04645	Cj0954c	putative DnaJ-like protein	1.22841	0.145249	2.14853	0.00097315	1.2681	0.0990977	1.25777	0.0990145
CJJ81176_RS04650	Cj0955c	phosphoribosylformylglycinamidine synthase	1.878	4.2875e-07	1.27541	0.000687671	0.452832	0.352608	0.467085	0.329586
CJJ81176_RS04655	Cj0956c	putative tRNA modification GTPase	2.25494	0.000470068	2.49116	1.83938e-05	0.790031	0.319582	0.862219	0.258576
CJJ81176_RS04660	Cj0957c	hypothetical protein Cj0957c	1.32852	0.00985175	1.69159	0.000159013	0.937058	0.0770977	1.06149	0.0368874
CJJ81176_RS04665	Cj0958c	putative membrane protein	1.31797	0.00047886	1.47269	2.39291e-05	0.551556	0.218788	0.651288	0.122294
CJJ81176_RS04670	Cj0959c	conserved hypothetical protein Cj0959c	0.681519	0.331402	0.485837	0.431114	-0.696583	0.311447	-0.610615	0.369674
CJJ81176_RS04675	Cj0960c	ribonuclease P protein component	0.730971	0.330168	0.807215	0.22433	0.538161	0.485122	0.627121	0.408599
CJJ81176_RS04680	Cj0961c	50S ribosomal protein L34	1.19339	0.0435125	0.481139	0.439137	0.582073	0.392246	0.641915	0.329586
CJJ81176_RS04685	Cj0962	putative acetyltransferase	0.148793	0.938296	2.24429	0.000722128	2.63569	5.88931e-05	2.32479	0.000483492
CJJ81176_RS04690	Cj0963	hypothetical protein Cj0963	0.509142	0.708671	1.40463	0.0951006	1.17429	0.218035	0.898009	0.363276
CJJ81176_RS04695	Cj0964	putative periplasmic protein	0.633604	0.351124	0.5078	0.401898	-0.0238438	0.977861	0.0369123	0.970564
CJJ81176_RS04700	Cj0965c	putative acyl-CoA thioester hydrolase	-0.125718	0.935769	-0.967637	0.201498	-0.696066	0.426475	-0.409128	0.659851
CJJ81176_RS04705	n/a	hypothetical protein	NA	NA	NA	NA	NA	NA	NA	NA
CJJ81176_RS04710	n/a	hypothetical protein	0.791055	0.531612	0.691509	0.549091	1.04558	NA	0.41571	0.769431
CJJ81176_RS04715	n/a	hypothetical protein	-0.147547	0.949793	1.0857	0.34403	0.563756	0.681128	0.812101	0.545151
CJJ81176_RS04720	n/a	hypothetical protein	-0.0381698	0.994794	-0.40843	0.730829	0.766296	0.510549	0.747447	0.525197
CJJ81176_RS04725	Cj0975	putative outer-membrane protein	1.74988	0.13748	-0.797747	0.499043	-0.925661	0.480932	0.654435	0.634499
CJJ81176_RS04730	Cj0976	putative methyltransferase	-0.677283	0.503188	-0.825513	0.28704	-0.297758	0.752009	-0.282885	0.769431
CJJ81176_RS04735	Cj0977	hypothetical protein Cj0977	0.773573	0.0308554	0.119373	0.776525	0.106402	0.815569	0.234149	0.584171
CJJ81176_RS04740	Cj0978c	putative lipoprotein	1.18485	0.211693	0.907805	0.282953	0.789047	0.41265	0.813962	0.384886
CJJ81176_RS04745	Cj0979c	putative secreted nuclease	1.28641	0.242018	2.15273	0.00928291	2.55428	0.00202618	2.42626	0.00346579
CJJ81176_RS04750	Cj0980	putative peptidase	-1.53321	0.000106541	-1.47349	4.02473e-05	-0.531065	0.237588	-0.524473	0.235785
CJJ81176_RS04755	Cj0981c	putative MFS (Major Facilitator Superfamily) transport protein	-0.900516	0.283581	-0.848483	0.253176	-0.851504	0.296951	-0.941833	0.236475
CJJ81176_RS04760	Cj0982c	putative amino-acid transporter periplasmic solute-binding protein	-0.81763	0.208579	0.679202	0.244125	0.856951	0.163163	0.535177	0.420415
CJJ81176_RS04765	Cj0983	putative lipoprotein	1.06293	0.140522	1.5492	0.0108866	0.858305	0.24115	0.777177	0.296448
CJJ81176_RS04770	Cj0984	conserved hypothetical protein Cj0984	2.08756	0.0125231	2.45705	0.00075011	1.48599	0.0836952	1.24458	0.162059
CJJ81176_RS04775	Cj0985c	hippurate hydrolase	-0.702765	0.24349	-0.794608	0.100723	0.296683	0.604454	0.252428	0.670519
CJJ81176_RS04780	Cj0986c	putative integral membrane protein	0.251221	0.900048	-0.355942	0.792598	0.804903	0.54192	1.39233	0.254589
CJJ81176_RS04795	Cj0989	putative membrane protein	-0.878126	0.511243	-1.98027	0.0527578	0.215555	0.8751	1.07085	0.329238
CJJ81176_RS04800	Cj0990c	hypothetical protein Cj0990c	0.21148	0.916472	0.746704	0.491341	0.539948	0.664339	0.655411	0.596636
CJJ81176_RS04805	Cj0991c	putative oxidoreductase ferredoxin-type electron transport protein	0.331183	0.63768	-0.0615112	0.927817	-0.593569	0.296951	-0.418228	0.476885
CJJ81176_RS04810	Cj0992c	oxygen-independent coproporphyrinogen III oxidase	-0.292742	0.581136	-0.883285	0.0160274	-0.807671	0.0400005	-0.730648	0.0671938
CJJ81176_RS04815	Cj0993c	hypothetical protein Cj0993c	-0.0955265	0.900746	-0.344465	0.410185	-0.151114	0.760742	-0.428368	0.331602
CJJ81176_RS04820	Cj0994c	ornithine carbamoyltransferase	-0.26506	0.730173	-0.46517	0.410185	-0.168965	0.806774	-0.200545	0.777898
CJJ81176_RS04825	Cj0995c	delta-aminolevulinic acid dehydratase	-0.50772	0.484918	-0.0988043	0.894227	0.323571	0.648358	0.482204	0.489489
CJJ81176_RS04830	Cj0996	GTP cyclohydrolase II	0.17976	0.89899	0.789525	0.278089	0.920085	0.238027	1.1689	0.104598
CJJ81176_RS04835	Cj0997	putative methyltransferase (GidB homolog)	-0.443443	0.746869	-0.592631	0.540493	-0.397817	0.72071	0.155621	0.900084
CJJ81176_RS04840	Cj0998c	putative periplasmic protein	-0.370316	0.649344	-0.132496	0.856468	0.68057	0.31036	0.723868	0.272204
CJJ81176_RS04845	Cj0999c	putative integral membrane protein	0.318543	0.839511	0.589766	0.537917	1.00638	0.296907	1.22904	0.172798
CJJ81176_RS04850	Cj1000	putative transcriptional regulator (LysR family)	0.0726614	0.981003	1.24678	0.0979627	0.46742	0.623346	0.691446	0.444795
CJJ81176_RS04855	Cj1001	RNA polymerase sigma factor (sigma-70)	0.768189	0.0390068	0.486645	0.184019	0.0109188	0.980269	-0.00437635	1
CJJ81176_RS04860	Cj1002c	putative phosphoglycerate/bisphosphoglycerate mutase	1.43697	0.10973	1.22907	0.130828	1.11671	0.21692	0.778377	0.413976
CJJ81176_RS04865	Cj1003c	putative integral membrane protein	0.698548	0.455083	-0.638029	0.43611	-0.237708	0.80538	-0.106145	0.926625
CJJ81176_RS04870	Cj1004	putative periplasmic protein	-0.4019	0.786167	-1.08989	0.280144	-0.679132	0.554611	-0.649979	0.584193
CJJ81176_RS04875	Cj1005c	putative membrane bound ATPase	0.23522	0.777188	0.323008	0.581403	0.237496	0.726039	0.305901	0.640123
CJJ81176_RS04880	Cj1006c	putative MiaB-like tRNA modifying enzyme	-0.167643	0.878277	0.646555	0.24721	0.249909	0.722113	0.563827	0.363043
CJJ81176_RS04885	Cj1007c	putative mechanosensitive ion channel family protein	0.00689824	1	-0.0781318	0.915524	-0.143644	0.846725	-0.0992311	0.905412
CJJ81176_RS04890	Cj1008c	3-dehydroquinate synthase	-0.00143957	1	0.471699	0.354072	0.470201	0.41192	0.37748	0.519808
CJJ81176_RS04895	Cj1009c	conserved hypothetical proetin Cj1009c	-0.00958293	1	0.784103	0.0962837	1.02963	0.0293634	0.858571	0.0782002
CJJ81176_RS04900	Cj1010	queuine tRNA-ribosyltransferase	-0.253724	0.771648	0.159941	0.803656	0.395617	0.52151	0.23477	0.722009
CJJ81176_RS04905	Cj1011	putative CorA-like Mg2+ transporter protein	1.14309	0.329778	0.816594	0.439551	0.321934	0.804993	0.449435	0.722252
CJJ81176_RS04915	Cj1012c	putative membrane protein	0.865065	0.283581	0.205047	0.809209	-0.456368	0.587393	-0.362873	0.676462
CJJ81176_RS04920	Cj1013c	putative cytochrome C biogenesis protein	0.706587	0.0603422	0.622769	0.0757296	0.0331164	0.951281	0.256187	0.55996
CJJ81176_RS04925	Cj1014c	branched-chain amino-acid ABC transport system ATP-binding protein	0.701435	0.23813	1.04606	0.0242145	0.417772	0.484689	0.204858	0.754891
CJJ81176_RS04930	Cj1015c	branched-chain amino-acid ABC transport system ATP-binding protein	1.84667	0.000482865	1.61188	0.00129784	0.816055	0.188543	0.867972	0.14507
CJJ81176_RS04935	Cj1016c	branched-chain amino-acid ABC transport system permease protein	0.608964	0.238498	0.588601	0.186341	-0.544472	0.288734	-0.355827	0.50548
CJJ81176_RS04940	Cj1017c	branched-chain amino-acid ABC transport system permease protein	0.495253	0.316052	0.466463	0.264314	0.0457632	0.939804	-0.00538389	1
CJJ81176_RS04945	n/a	branched-chain amino acid ABC transporter substrate-binding protein	0.399612	0.31112	-0.130007	0.742459	-0.223132	0.583312	-0.241376	0.55688
CJJ81176_RS04950	n/a	branched-chain amino acid ABC transporter substrate-binding protein	-0.118416	0.86102	0.0700787	0.886217	0.42273	0.34289	0.47004	0.278662
CJJ81176_RS04955	Cj1020c	putative cytochrome C	-0.00294962	1	0.137346	0.815667	-0.142583	0.822278	-0.190336	0.765141
CJJ81176_RS04960	Cj1021c	putative periplasmic protein	-0.588716	0.616728	0.65129	0.453095	0.434934	0.66295	0.576862	0.559291
CJJ81176_RS04965	Cj1022c	putative integral membrane protein	-0.739024	0.283581	-0.252933	0.682958	0.0224688	0.977861	0.127058	0.869851
CJJ81176_RS04970	Cj1023c	aspartate-semialdehyde dehydrogenase	-0.647119	0.23394	-0.67838	0.136042	-0.54041	0.29065	-0.663352	0.171352
CJJ81176_RS04975	Cj1024c	sigma-54 associated transcriptional activator	-1.30078	0.0210672	-0.304787	0.577511	0.0992929	0.887702	0.200065	0.754891
CJJ81176_RS04980	Cj1025c	hypothetical protein Cj1025c	1.15887	0.140522	0.809159	0.271556	-0.798843	0.352413	-0.69639	0.416106
CJJ81176_RS04985	Cj1026c	putative lipoprotein	0.57684	0.179594	-0.189133	0.67259	-0.060187	0.916099	-0.200826	0.691212
CJJ81176_RS04990	Cj1027c	DNA gyrase subunit A	-0.0605682	0.895993	-0.26704	0.293824	-0.415587	0.106007	-0.583005	0.0139596
CJJ81176_RS04995	Cj1028c	putative purine/pyrimidine phosphoribosyltransferase	0.0335982	0.994794	-1.10702	0.185925	-0.935013	0.312724	-0.922078	0.311325
CJJ81176_RS05000	Cj1029c	putative liproprotein	-0.618622	0.284509	0.484812	0.310394	1.41111	0.000752952	1.42528	0.000574836
CJJ81176_RS05005	Cj1030c	GTP-binding protein	0.0325981	0.98857	0.844406	0.0548833	0.511022	0.329877	0.317241	0.574192
CJJ81176_RS05010	Cj1031	outer membrane component of efflux system (multidrug efflux system CmeDEF)	0.523653	0.471146	1.62573	0.00097315	0.73161	0.238027	1.13933	0.0387653
CJJ81176_RS05015	Cj1032	membrane fusion component of efflux system (mutlidrug efflux system CmeDEF)	0.61377	0.410131	0.551227	0.387686	0.00105518	0.998334	0.0742804	0.936491
CJJ81176_RS05020	Cj1033	integral membrane component of efflux system (multidrug efflux system CmeDEF)	1.05752	0.0245817	1.1949	0.00358897	0.365797	0.502709	0.349257	0.525794
CJJ81176_RS05025	Cj1034c	putative DnaJ-like protein	-0.203504	0.864825	1.20201	0.0430048	1.26789	0.0414726	1.34411	0.0274969
CJJ81176_RS05030	Cj1035c	putative arginyl-tRNA-protein transferase	-0.826423	0.297993	0.000555021	0.999653	-0.327626	0.645275	-0.408322	0.560188
CJJ81176_RS05035	Cj1036c	conserved hypothetical protein Cj1036c	-0.975331	0.136607	-1.04481	0.0503382	-0.787807	0.186703	-0.924149	0.0997646
CJJ81176_RS05040	Cj1037c	pyruvate carboxylase A subunit	-0.873967	0.0419383	-1.51174	3.34838e-05	-0.693992	0.106007	-0.682498	0.111051
CJJ81176_RS05045	Cj1038	putative cell division/peptidoglycan biosynthesis protein	1.22097	0.165045	1.58765	0.0275879	0.726389	0.429384	1.16374	0.15367
CJJ81176_RS05050	Cj1039	putative undecaprenyldiphospho-muramoylpentapeptide b-N-acetylglucosaminyltransferase	1.40027	0.0792304	1.27948	0.0696427	0.891985	0.278607	0.617558	0.476166
CJJ81176_RS05060	Cj1041c	putative periplasmic ATP/GTP-binding protein	-1.35213	0.0529747	-0.397503	0.576628	-0.373462	0.630774	-0.190911	0.834299
CJJ81176_RS05065	Cj1042c	putative transcriptional regulatory protein	-0.486553	0.724672	0.724566	0.428933	0.338948	0.759929	0.0322794	0.984712
CJJ81176_RS05070	Cj1043c	putative thiamine-phosphate pyrophosphorylase	-0.251185	0.822791	0.118715	0.882694	-0.2039	0.80538	-0.226931	0.787433
CJJ81176_RS05075	Cj1044c	thiazole biosynthesis protein ThiH	0.0699252	0.937683	-0.388489	0.366677	-0.751092	0.0774754	-0.686564	0.104455
CJJ81176_RS05080	Cj1045c	thiazole biosynthesis protein ThiG	-0.394037	0.442609	-1.31803	0.00033856	-0.985282	0.0127829	-0.973941	0.0118476
CJJ81176_RS05085	Cj1046c	putative molybdopterin biosynthesis protein	0.0794461	0.926066	-0.454931	0.284239	-0.505416	0.269852	-0.606392	0.164693
CJJ81176_RS05090	Cj1047c	putative thiamine biosynthesis protein	0.218932	0.891578	0.626812	0.450334	0.992094	0.238201	0.54113	0.559787
CJJ81176_RS05095	Cj1048c	succinyl-diaminopimelate desuccinylase	0.68238	0.218273	0.248975	0.647158	0.250711	0.673648	0.116582	0.866046
CJJ81176_RS05100	Cj1049c	putative LysE family transporter protein	-0.390741	0.739776	0.177972	0.839299	-0.0795606	0.939804	0.240707	0.800594
CJJ81176_RS05105	Cj1050c	NAD-dependent deacetylase	1.09305	0.0727492	0.19801	0.772411	-0.21853	0.763377	-0.114299	0.890775
CJJ81176_RS05110	Cj1052c	putative mismatch repair protein	0.824427	0.0518368	0.95092	0.00685097	0.169301	0.74005	-0.115048	0.834654
CJJ81176_RS05115	Cj1053c	putative integral membrane protein	-0.574332	0.705609	-0.0127789	0.990818	0.724694	0.535092	0.0966178	0.950397
CJJ81176_RS05120	Cj1054c	UDP-N-acetylmuramate--alanine ligase	-0.350035	0.573911	-0.164103	0.75422	-0.154705	0.7857	-0.212188	0.706345
CJJ81176_RS05125	Cj1055c	putative sulfatase family protein	0.733382	0.27974	0.20159	0.769376	0.164055	0.827663	0.472549	0.478772
CJJ81176_RS05130	Cj1056c	putative carbon-nitrogen hydrolase family protein	-0.732644	0.221092	0.325948	0.540493	0.238203	0.697775	0.0545291	0.941036
CJJ81176_RS05135	Cj1057c	putative coiled-coil protein	-0.712844	0.477479	-0.355672	0.692482	-0.344645	0.736204	-0.508622	0.603626
CJJ81176_RS05140	Cj1058c	inosine-5'-monophosphate dehydrogenase	0.0758635	0.938853	-0.798173	0.0857456	-0.720389	0.160997	-0.829376	0.0925195
CJJ81176_RS05145	Cj1059c	Glu-tRNAGln amidotransferase subunit A	0.161185	0.809632	-0.402221	0.370651	-0.594918	0.208776	-0.598771	0.194516
CJJ81176_RS05150	Cj1060c	putative membrane protein	0.04637	0.990378	-0.676674	0.415088	-0.314496	0.749535	-0.589005	0.520088
CJJ81176_RS05155	Cj1061c	isoleucyl-tRNA synthetase	-0.490072	0.195694	-0.406672	0.244567	-0.347353	0.381011	-0.31105	0.437847
CJJ81176_RS05160	Cj1062	putative CinA-like protein	-0.320496	0.679582	-0.418433	0.427717	-0.255067	0.671518	0.0910296	0.896337
CJJ81176_RS05165	Cj1063	putative acetyltransferase	0.57406	0.649344	0.350166	0.719399	0.505596	0.620311	-0.566857	0.59771
CJJ81176_RS05170	Cj1064	NAD(P)H-dependent oxidoreductase	-0.647156	0.373452	0.0537153	0.9464	-0.0184349	0.980269	0.119456	0.890775
CJJ81176_RS05175	Cj1066	nitroreductase	0.168742	0.895993	0.409444	0.574955	0.439264	0.580182	0.538276	0.493082
CJJ81176_RS05180	Cj1067	CDP-diacylglycerol--glycerol-3-phosphate 3-phosphatidyltransferase	0.0354085	0.99152	0.712665	0.294523	0.590091	0.445004	0.296524	0.726039
CJJ81176_RS05185	Cj1068	putative peptidase M50 family protein	0.218502	0.82353	0.689971	0.24075	0.531098	0.432558	0.539977	0.416106
CJJ81176_RS05190	Cj1069	conserved hypothetical protein Cj1069	0.667693	0.497319	0.798912	0.291047	0.306127	0.749535	0.10273	0.928191
CJJ81176_RS05195	Cj1070	30S ribosomal protein S6	0.51564	0.636907	2.19375	0.00195384	1.32739	0.106279	1.09113	0.203269
CJJ81176_RS05200	Cj1071	single-strand DNA binding protein	1.09553	0.0384375	2.18541	6.87786e-07	1.06036	0.0401706	0.843748	0.118062
CJJ81176_RS05205	Cj1072	30S ribosomal protein S18	1.72996	0.000229008	1.85621	2.15212e-05	1.15476	0.0202186	1.40422	0.00265928
CJJ81176_RS05210	Cj1073c	ATP-dependent protease La	0.632126	0.0427584	0.664965	0.0133584	0.436832	0.164557	0.542021	0.0665229
CJJ81176_RS05215	Cj1074c	putative lipoprotein	-0.120455	0.919492	0.441147	0.479241	0.982591	0.101736	1.05489	0.0751241
CJJ81176_RS05220	Cj1075	conserved hypothetical protein Cj1075	-2.3442	0.00187503	-0.431027	0.619138	0.218057	0.829658	0.345961	0.730977
CJJ81176_RS05225	Cj1076	pyrroline-5-carboxylate reductase	-0.154672	0.820106	-0.141568	0.765423	-0.526673	0.238201	-0.81007	0.0442266
CJJ81176_RS05230	Cj1077	putative periplasmic protein	1.37248	0.268964	-0.126346	0.931183	0.74001	0.57505	-0.400994	0.78844
CJJ81176_RS05235	Cj1078	putative periplasmic protein	-0.399849	NA	-0.476821	NA	-0.478395	NA	-0.492797	NA
CJJ81176_RS05240	Cj1079	putative periplasmic protein	-0.250685	0.884361	-0.13032	0.927817	0.128002	NA	0.826645	0.526946
CJJ81176_RS05245	Cj1080c	putative uroporphyrinogen-III synthase	-0.261553	0.895064	1.58596	0.100603	0.977544	0.401841	0.331104	0.814371
CJJ81176_RS05250	Cj1081c	thiamin-phosphate pyrophosphorylase	1.28894	0.0466853	0.816215	0.192833	-0.384386	0.621844	0.20614	0.813649
CJJ81176_RS05255	Cj1082c	phosphomethylpyrimidine kinase	0.920377	0.0387994	0.199653	0.680641	-0.372923	0.472457	-0.0366516	0.958005
CJJ81176_RS05260	Cj1083c	putative nuclease	0.910559	0.289303	1.56262	0.0134897	0.960168	0.208776	1.20073	0.0869177
CJJ81176_RS05265	Cj1084c	putative ATP/GTP-binding protein	0.526325	0.573911	1.12218	0.0776151	0.557583	0.480932	0.705118	0.345193
CJJ81176_RS05270	Cj1085c	transcription-repair coupling factor	0.898516	0.28466	0.450622	0.585364	0.0216144	0.980556	-0.00808203	1
CJJ81176_RS05275	Cj1086c	conserved hypothetical protein Cj1086c	-0.201005	0.724672	-0.582011	0.123542	-0.499245	0.237911	-0.361296	0.40776
CJJ81176_RS05280	Cj1087c	putative peptidase	-0.263635	0.746821	0.13102	0.845378	-0.293793	0.659285	-0.159115	0.834654
CJJ81176_RS05285	Cj1088c	folylpolyglutamate synthase/dihydrofolate synthase	1.69571	0.0267191	2.49573	5.19939e-05	2.42335	0.000136214	2.83589	2.92397e-06
CJJ81176_RS05290	Cj1089c	hypothetical protein Cj1089c	1.65236	0.0593347	1.04359	0.226031	0.282517	0.799537	0.410139	0.703801
CJJ81176_RS05295	Cj1090c	putative lipoprotein	1.07559	0.173146	1.29118	0.0444766	1.0281	0.158496	1.05547	0.133456
CJJ81176_RS05300	Cj1091c	leucyl-tRNA synthetase	0.588081	0.110262	0.948662	0.00150375	0.562672	0.106279	0.696387	0.0357501
CJJ81176_RS05305	Cj1092c	protein-export membrane protein	1.05434	0.0281413	1.001	0.0256554	0.286737	0.621844	0.497057	0.365832
CJJ81176_RS05310	Cj1093c	protein-export membrane protein	1.33795	6.09827e-05	0.445398	0.240542	-0.0641279	0.906312	-0.0204506	0.974636
CJJ81176_RS05315	Cj1094c	putative preprotein translocase protein	0.171889	0.860882	0.831758	0.108649	0.97124	0.0702856	1.17995	0.0196338
CJJ81176_RS05320	Cj1095	putative apolipoprotein N-acyltransferase. Functional classification-Membranes, lipoproteins and porins	0.26693	0.86102	0.844811	0.32215	0.261682	0.811382	0.00548445	1
CJJ81176_RS05325	Cj1096c	S-adenosylmethionine synthetase	0.529576	0.196283	0.0880879	0.849299	0.121434	0.804037	0.029313	0.961387
CJJ81176_RS05330	Cj1097	putative transmembrane transport protein	-0.255285	0.641944	-0.480076	0.201292	-0.137826	0.763377	-0.189989	0.676462
CJJ81176_RS05335	Cj1098	aspartate carbamoyltransferase	-0.367099	0.620599	-0.0238654	0.970081	-0.0317513	0.96709	0.341229	0.559542
CJJ81176_RS05340	Cj1099	peptidase	-0.751977	0.0956168	-0.342621	0.395657	-0.190234	0.683137	-0.244473	0.594732
CJJ81176_RS05345	Cj1100	hypothteical protein Cj1100	-0.303532	0.760765	-1.00499	0.118453	-0.643685	0.381011	-0.935539	0.167625
CJJ81176_RS05350	Cj1101	ATP-dependent DNA helicase	0.669231	0.23394	0.0408755	0.948815	-0.82504	0.12137	-0.76699	0.143436
CJJ81176_RS05355	Cj1102	tRNA pseudouridine synthase B	0.626538	0.484309	0.0176093	0.984069	-0.544713	0.519811	-0.422385	0.622499
CJJ81176_RS05360	Cj1103	carbon storage regulator homolog	0.871326	0.254697	-0.286666	0.711226	-0.198379	0.820459	-0.09446	0.927185
CJJ81176_RS05365	Cj1104	putative 4-diphosphocytidyl-2-C-methyl-D-erythritol kinase	1.07967	0.188374	0.956013	0.190616	0.420703	0.631714	0.289566	0.763763
CJJ81176_RS05370	Cj1105	small protein B homolog	0.685431	0.406187	1.04673	0.109718	0.655999	0.402991	0.568431	0.470569
CJJ81176_RS05375	Cj1106	putative periplasmic thioredoxin	0.464935	0.490633	0.919567	0.0575702	0.833206	0.115373	0.626821	0.261161
CJJ81176_RS05380	Cj1107	ATP-dependent Clp protease adaptor protein	1.56838	0.0234667	0.760325	0.282288	0.760168	0.32846	0.799766	0.292016
CJJ81176_RS05385	Cj1108	ATP-dependent Clp protease ATP-binding subunit	1.05762	0.0461395	0.53481	0.319087	-0.0566383	0.940401	0.328644	0.60649
CJJ81176_RS05390	Cj1109	leucyl/phenylalanyl-tRNA--protein transferase	0.754266	0.477479	0.0997642	0.931183	-0.336406	0.759929	-0.243992	0.838258
CJJ81176_RS05395	Cj1110c	putative MCP-type signal transduction protein	-0.699322	0.131063	-0.362046	0.420319	-0.096013	0.870927	0.0706115	0.911877
CJJ81176_RS05400	Cj1111c	putative MarC family integral membrane protein	-0.696343	0.283581	-1.21179	0.0139275	-1.4778	0.00315784	-1.1966	0.0161394
CJJ81176_RS05405	Cj1112c	putative SelR domain containing protein	-0.323996	0.670149	-0.034395	0.953015	0.182627	0.758913	0.488129	0.342921
CJJ81176_RS05410	Cj1113	conserved hypothetical protein Cj1113	0.616422	0.601168	0.652963	0.466463	0.156752	0.899319	0.40159	0.704823
CJJ81176_RS05415	Cj1114c	CDP-diacylglycerol--serine O-phosphatidyltransferase	0.347778	0.66964	-0.293297	0.647763	-0.399174	0.556232	-0.263365	0.71783
CJJ81176_RS05420	Cj1115c	putative phosphatidylserine decarboxylase-related protein	1.02582	0.0678986	1.46802	0.00155261	0.813551	0.145763	1.11938	0.0282451
CJJ81176_RS05425	Cj1116c	membrane bound zinc metallopeptidase	0.737805	0.0603422	0.336407	0.406934	-0.144397	0.763377	-0.0445807	0.937451
CJJ81176_RS05430	Cj1117c	ribosomal protein L11 methyltransferase	1.10288	0.112922	1.40614	0.0206521	0.902149	0.208776	0.939662	0.177619
CJJ81176_RS05435	Cj1118c	chemotaxis regulatory protein	0.298745	0.721948	0.439686	0.479241	0.414801	0.548601	0.376402	0.598572
CJJ81176_RS05440	Cj1119c	putative integral membrane protein	-0.0268662	0.990378	-0.424138	0.348156	-0.565747	0.238359	-0.410953	0.40776
CJJ81176_RS05445	Cj1120c	UDP-GlcNAc C4,6 dehydratase	-0.556286	0.268964	-0.772063	0.0641112	-0.814005	0.0649177	-0.574788	0.220744
CJJ81176_RS05450	Cj1121c	UDP-4-keto-6-deoxy-GlcNAc C4 aminotransferase	-0.732445	0.339693	-0.486748	0.49291	0.0558234	0.954196	0.193491	0.834654
CJJ81176_RS05455	Cj1123c	acetyltransferase	0.760551	0.426298	0.738515	0.352533	-0.0914684	0.938789	-0.167186	0.882826
CJJ81176_RS05460	Cj1124c	galactosyltransferase	1.08658	0.185222	1.9216	0.00160982	1.32837	0.0560077	1.41337	0.0371998
CJJ81176_RS05465	Cj1125c	GalNAc transferase	0.520268	0.528413	0.893416	0.134986	0.602443	0.393764	0.520907	0.461353
CJJ81176_RS05470	Cj1126c	oligosaccharide transferase to N-glycosylate proteins	0.247668	0.724672	0.375523	0.447634	0.0535542	0.938789	0.205667	0.727757
CJJ81176_RS05475	Cj1127c	GalNAc transferase	0.751203	0.249061	0.796695	0.136042	0.412276	0.524392	0.879338	0.110442
CJJ81176_RS05480	Cj1128c	glucosyl transferase	1.28414	0.0996882	1.20639	0.0797701	0.98946	0.206998	0.674088	0.416106
CJJ81176_RS05485	Cj1129c	GalNAc transferase/polymerase	1.63719	0.0131818	1.86448	0.00134518	1.74126	0.00454374	1.45908	0.0212293
CJJ81176_RS05490	Cj1130c	flippase	0.998218	0.120342	0.129974	0.86315	-0.203925	0.794602	0.0726149	0.936491
CJJ81176_RS05495	Cj1131c	UDP-GlcNAc/Glc 4-epimerase	0.3143	0.432064	-1.35193	3.25468e-06	-1.01316	0.000960185	-0.913903	0.00311099
CJJ81176_RS05500	Cj1132c	conserved hypothetical protein Cj1132c	0.385117	0.694793	0.540738	0.451892	0.973981	0.179841	0.888202	0.225025
CJJ81176_RS05505	Cj1133	heptosyltransferase I	0.736801	0.357321	1.726	0.00139331	1.35675	0.0231765	1.55578	0.00587006
CJJ81176_RS05510	Cj1134	putative lipid A biosynthesis lauroyl acyltransferase	1.58928	0.0311434	1.90858	0.00189183	1.57899	0.0193915	1.47276	0.0290667
CJJ81176_RS05515	Cj1135	putative two-domain glucosyltransferase	0.473606	0.660483	0.541281	0.484023	0.206377	0.828528	0.804269	0.317186
CJJ81176_RS05520	n/a	glycosyl transferase	0.492085	0.675375	0.621105	0.457776	0.47343	0.617066	0.881575	0.311325
CJJ81176_RS05525	n/a	beta-1,4-N-acetylgalactosaminyltransferase	0.303885	0.765728	-0.739755	0.292194	-0.266699	0.752009	-0.248417	0.772024
CJJ81176_RS05530	n/a	benzoate transporter	-0.388489	0.682911	-0.184758	0.830485	-0.348254	NA	-0.426048	0.634499
CJJ81176_RS05535	n/a	glycosyl transferase	1.20298	0.340519	-0.571812	0.646246	0.418953	0.763377	1.44788	0.233217
CJJ81176_RS05540	n/a	alpha-2,3-sialyltransferase	-1.77318	0.00143392	-1.58598	0.000557509	-0.986523	0.0489865	-0.631975	0.235785
CJJ81176_RS05545	n/a	polyhydroxyalkanoate synthesis repressor PhaR	-1.43127	0.000163743	-2.0846	7.68164e-10	-1.81925	1.16509e-07	-1.51845	1.05688e-05
CJJ81176_RS05550	n/a	UDP-N-acetyl glucosamine 2-epimerase	-1.83653	0.000595665	-1.5942	0.000495828	-1.55022	0.000952915	-1.46185	0.00154468
CJJ81176_RS05555	n/a	beta-1,4-N-acetylgalactosaminyltransferase	-0.718056	0.242563	-1.0569	0.0320551	-1.44912	0.0034496	-1.23962	0.0126117
CJJ81176_RS05560	n/a	N-acylneuraminate cytidylyltransferase	-1.88798	0.009757	-1.023	0.100723	-1.06649	0.106007	-0.903144	0.174275
CJJ81176_RS05570	Cj1146c	putative glucosyltransferase	0.533634	0.712002	1.19304	0.203324	0.664985	0.550139	0.787119	0.471516
CJJ81176_RS05575	Cj1148	heptosyltransferase II	0.690257	0.340519	0.286659	0.674731	-0.387986	0.60241	-0.154246	0.856051
CJJ81176_RS05580	n/a	lipooligosaccharide biosynthesis glycosyltransferase	-1.03688	0.0554382	-0.22536	0.66389	-0.188209	0.749535	-0.185422	0.754891
CJJ81176_RS05585	Cj1149c	sedoheptulose 7-phosphate isomerase	-0.215115	0.815952	0.264979	0.658305	0.302412	0.634049	-0.172105	0.816687
CJJ81176_RS05590	Cj1150c	D-beta-D-heptose 7-phosphate kinase/D-beta-D-heptose 1-phosphate adenylyltransferase	-0.335273	0.649344	-0.0421103	0.948815	0.25393	0.683708	0.114883	0.874627
CJJ81176_RS05595	Cj1151c	ADP-glyceromanno-heptose 6-epimerase	-0.645327	0.347601	-0.311317	0.618888	0.40613	0.540315	0.114058	0.890358
CJJ81176_RS05600	Cj1152c	D,D-heptose 1,7-bisphosphate phosphatase	-0.599475	0.585042	1.3468	0.033481	1.9658	0.00122094	1.99083	0.000909366
CJJ81176_RS05605	Cj1153	putative periplasmic cytochrome C	-0.433531	0.685077	-1.1208	0.139051	0.0585507	0.959733	0.312802	0.754891
CJJ81176_RS05610	Cj1154c	putative cytochrome oxidase maturation protein cbb3-type	0.545086	0.596898	-0.231833	0.803625	-0.117367	0.913692	-0.0104217	1
CJJ81176_RS05615	Cj1155c	putative cation-transporting ATPase	-0.169104	0.878277	-0.041974	0.952604	-0.00283639	0.996661	-0.110523	0.890775
CJJ81176_RS05620	Cj1156	transcription termination factor	0.760775	0.0996882	0.104304	0.845918	-0.226347	0.676035	-0.402553	0.431774
CJJ81176_RS05625	Cj1157	putative DNA polymerase III subunit gamma	1.28702	0.00465944	0.721863	0.114976	0.0867301	0.900124	-0.0286232	0.972322
CJJ81176_RS05630	n/a	hypothetical protein	1.09675	0.359455	-0.926506	0.408456	-1.29805	0.272143	-0.828727	0.50548
CJJ81176_RS05635	Cj1161c	putative cation-transporting ATPase	0.158371	0.832911	0.590308	0.176203	0.848245	0.050965	0.553866	0.242608
CJJ81176_RS05640	Cj1162c	putative heavy-metal-associated domain protein	0.164152	0.938853	0.970904	0.321973	2.0616	0.0230511	1.72795	0.0671938
CJJ81176_RS05645	Cj1163c	putative cation transport protein	-0.472501	0.408491	-0.441588	0.332013	0.205402	0.701463	0.168742	0.764065
CJJ81176_RS05650	Cj1164c	hypothetical protein Cj1164c	0.506348	0.566153	-0.613359	0.395863	-0.552404	0.492035	-0.165082	0.865703
CJJ81176_RS05655	Cj1165c	putative integral membrane protein	-1.04152	0.270354	-2.33935	0.00176992	-1.91791	0.012923	-2.27564	0.00203367
CJJ81176_RS05660	n/a	membrane protein	-0.632911	0.542287	-0.318874	0.714542	-0.686648	0.447218	-0.970166	0.253477
CJJ81176_RS05665	Cj1167	L-lactate dehydrogenase	-1.99837	0.00464772	-1.49621	0.0145281	-0.261101	0.751397	-0.305109	0.705965
CJJ81176_RS05670	Cj1168c	putative integral membrane protein (dedA homolog)	0.962316	0.118689	1.15873	0.0320551	0.109521	0.897135	0.55277	0.409009
CJJ81176_RS05675	Cj1169c	putative periplasmic protein	2.78896	4.69704e-05	2.63297	7.21837e-05	2.21723	0.00161566	1.97264	0.00601829
CJJ81176_RS05680	Cj1170c	50 kda outer membrane protein precursor	2.59714	5.55113e-06	2.57795	3.91339e-06	1.93551	0.00118936	1.74196	0.00422838
CJJ81176_RS05685	Cj1171c	peptidyl-prolyl cis-trans isomerase	1.01319	0.0411379	-0.273611	0.617345	-0.156874	0.80538	-0.171962	0.796305
CJJ81176_RS05690	Cj1172c	conserved hypothetical protein Cj1172c	0.738419	0.0639833	-0.0193851	0.968475	-0.0208237	0.971203	-0.209274	0.662928
CJJ81176_RS05695	Cj1173	putative efflux protein (multidrug resistance protein)	-0.856313	0.449025	1.44384	0.0430048	0.937735	0.265033	0.914382	0.272204
CJJ81176_RS05700	Cj1174	putative efflux protein (multidrug resistance protein)	0.71406	0.526868	1.55476	0.0487491	0.654097	0.512381	0.85678	0.367532
CJJ81176_RS05705	Cj1175c	arginyl-tRNA synthetase	0.0321023	0.983652	0.277661	0.540493	-0.0129144	0.980269	-0.0844332	0.890775
CJJ81176_RS05710	Cj1176c	Sec-independent protein translocase (TatA/E homolog)	-0.098707	0.895993	-0.848117	0.0245079	-0.0403584	0.943929	-0.120872	0.827076
CJJ81176_RS05715	Cj1177c	guanylate kinase	-0.930384	0.190524	0.267487	0.711414	0.470288	0.535092	0.636385	0.384886
CJJ81176_RS05720	Cj1178c	highly acidic protein	-0.844124	0.110262	-0.432504	0.395657	-0.131381	0.834107	-0.146406	0.827398
CJJ81176_RS05725	Cj1179c	flagellar biosynthetic protein	0.0560891	0.990378	0.0386687	0.975706	-0.203306	0.8751	-0.133254	0.926625
CJJ81176_RS05730	Cj1180c	putative ABC transporter ATP-binding protein	1.65017	0.0455245	2.46034	0.000286712	1.45801	0.0665455	1.08366	0.198851
CJJ81176_RS05735	Cj1181c	elongation factor TS	2.21882	2.68942e-16	1.58671	2.84201e-09	1.22473	1.27848e-05	1.18798	2.30471e-05
CJJ81176_RS05740	Cj1182c	30S ribosomal protein S2	1.87485	2.63777e-07	1.53473	2.27873e-05	1.38071	0.000265353	1.14436	0.00331038
CJJ81176_RS05745	Cj1183c	cyclopropane-fatty-acyl-phospholipid synthase	0.400246	0.688432	0.910715	0.197843	2.71361	9.13707e-06	2.59379	2.43628e-05
CJJ81176_RS05750	Cj1184c	putative ubiquinol-cytochrome C reductase cytochrome C subunit	-0.547264	0.211693	-2.24854	1.65125e-11	-2.09528	6.12529e-10	-2.21325	4.18226e-11
CJJ81176_RS05755	Cj1185c	putative ubiquinol-cytochrome C reductase cytochrome B subunit	-0.337832	0.442609	-2.50261	1.55314e-16	-2.62816	4.85599e-18	-2.59206	1.08615e-17
CJJ81176_RS05760	Cj1186c	putative ubiquinol-cytochrome C reductase iron-sulfur subunit	-0.089787	0.91056	-1.76667	1.78497e-06	-1.84845	7.12028e-07	-1.8695	4.45672e-07
CJJ81176_RS05765	Cj1187c	arsenical pump membrane protein	0.913473	0.36177	0.858699	0.309243	-0.722255	0.483437	-0.53804	0.605314
CJJ81176_RS05770	Cj1188c	tRNA uridine 5-carboxymethylaminomethyl modification enzyme	0.641621	0.0972769	0.771534	0.0206521	0.122834	0.790583	-0.0436274	0.936491
CJJ81176_RS05775	Cj1189c	bipartate energy taxis response protein cetB	-0.192938	0.770246	0.69065	0.111077	1.12538	0.00738526	1.1882	0.00394445
CJJ81176_RS05780	Cj1190c	bipartate energy taxis response protein cetA	-0.139208	0.78919	0.504075	0.143131	0.980222	0.0022689	0.826293	0.0131791
CJJ81176_RS05785	Cj1191c	putative PAS domain containing signal-transduction sensor protein	0.968348	0.301985	1.84798	0.00964317	1.28236	0.119083	1.30069	0.108202
CJJ81176_RS05790	Cj1192	putative C4-dicarboxylate transport protein	-2.26593	2.77082e-07	-2.62179	2.85228e-10	-2.16831	3.74893e-07	-2.17003	3.18275e-07
CJJ81176_RS05795	Cj1193c	putative periplasmic protein	0.149618	0.916763	0.78645	0.258906	0.894616	0.233925	1.05069	0.135614
CJJ81176_RS05800	Cj1194	possible phosphate permease	-1.6295	9.34199e-06	-1.64844	1.26494e-06	-1.25644	0.000465843	-1.07718	0.0030678
CJJ81176_RS05805	Cj1195c	putative dihydroorotase	-0.6206	0.250357	0.454828	0.298759	0.129096	0.815569	0.277085	0.594611
CJJ81176_RS05810	Cj1196c	glycerol-3-phosphate dehydrogenase [NAD(P)+]	-0.0362814	0.983652	0.262722	0.617198	-0.0269586	0.971137	-0.132931	0.840637
CJJ81176_RS05815	Cj1197c	Glu-tRNAGln amidotransferase subunit B	-1.00807	0.00978245	-0.754422	0.0430827	-0.145371	0.765169	-0.233162	0.629513
CJJ81176_RS05820	Cj1198	S-ribosylhomocysteine lyase (autoinducer-2 production protein LuxS)	-0.189588	0.789862	-0.595181	0.21983	-0.425185	0.445004	-0.178676	0.777898
CJJ81176_RS05825	Cj1199	putative iron/ascorbate-dependent oxidoreductase	-0.981945	0.126277	-1.71881	0.000894206	0.0166402	0.980269	0.0253407	0.979065
CJJ81176_RS05830	Cj1200	putative NLPA family lipoprotein	-0.82352	0.320812	-1.67046	0.00841941	-0.22665	0.777512	0.035819	0.974607
CJJ81176_RS05835	Cj1201	5-methyltetrahydropteroyltriglutamate-- homocysteine methyltransferase	-1.17321	0.0785686	-1.15578	0.0430375	-0.377153	0.589133	-0.208918	0.78844
CJJ81176_RS05840	Cj1202	5,10-methylenetetrahydrofolate reductase	0.272324	0.832652	-0.923441	0.254799	-0.63744	0.4836	0.110269	0.922335
CJJ81176_RS05845	Cj1203c	putative integral membrane protein	-0.239431	0.901984	-0.773223	0.516567	-0.0446996	NA	-0.681785	0.620698
CJJ81176_RS05850	Cj1204c	ATP synthase F0 sector A subunit	-1.23714	0.00985175	-0.482445	0.329861	-1.24868	0.00636522	-1.40769	0.00146082
CJJ81176_RS05855	Cj1205c	putative DNA repair protein RadA (ATP-dependant protease)	0.606591	0.330241	0.0154461	0.981703	-0.439149	0.490044	-0.588653	0.331602
CJJ81176_RS05860	Cj1206c	putative signal recognition particle protein	-0.0036766	1	0.29134	0.536543	0.405961	0.420984	0.516254	0.27771
CJJ81176_RS05865	Cj1207c	putative lipoprotein thiredoxin	-0.421763	0.550162	0.416734	0.444399	0.742321	0.178201	0.865091	0.0990145
CJJ81176_RS05870	Cj1208	putative 5-formyltetrahydrofolate cyclo-ligase family protein	-0.0572314	0.977386	0.0218891	0.976192	0.0653905	0.938789	0.334259	0.634499
CJJ81176_RS05875	Cj1209	HD/KH domain containing protein	0.26523	0.675375	-0.497506	0.280144	-0.803002	0.0826128	-0.682553	0.149614
CJJ81176_RS05880	Cj1210	putative integral membrane protein	0.248053	0.811759	0.180714	0.812629	0.0188589	0.980269	-0.0548926	0.956822
CJJ81176_RS05885	Cj1211	putative competence family protein	0.421914	0.779392	-0.58615	0.599359	-0.72963	0.541568	-0.458283	0.716105
CJJ81176_RS05890	Cj1212c	putative ribonuclease BN	0.831596	0.504924	0.789688	0.438762	1.3911	0.17159	0.497134	0.679159
CJJ81176_RS05895	Cj1213c	putative glycolate oxidase subunit D	0.0708749	0.923201	-0.0127256	0.977618	-0.5515	0.159558	-0.318093	0.451186
CJJ81176_RS05900	Cj1214c	putative exporting protein	-0.507976	0.232941	-0.0225105	0.957638	-0.130313	0.763377	-0.0878538	0.854422
CJJ81176_RS05905	Cj1215	putative peptidase M23 family protein	1.29368	0.00774534	1.0442	0.0249892	0.274872	0.65468	0.400034	0.502458
CJJ81176_RS05910	Cj1216c	hypothetical protein Cj1216c	0.0924773	0.970847	-0.186433	0.866345	-0.336142	0.763375	-0.0751993	0.957814
CJJ81176_RS05915	Cj1217c	conserved hypothetical protein Cj1217c	0.197806	0.897187	0.731217	0.334687	1.10872	0.148254	0.60756	0.474978
CJJ81176_RS05920	Cj1218c	putative riboflavin synthase alpha chain	0.157401	0.901984	0.46713	0.509039	0.247937	0.763377	0.688295	0.351269
CJJ81176_RS05925	Cj1219c	putative periplasmic protein	-0.0261582	0.99152	0.40206	0.483813	0.777482	0.181799	0.688177	0.244538
CJJ81176_RS05930	Cj1220	10 kD chaperonin (cpn10)	-0.856086	0.0379053	-2.05738	2.32872e-09	-1.60858	7.39367e-06	-1.42753	8.54659e-05
CJJ81176_RS05935	Cj1221	60 kD chaperonin (cpn60)	-0.288191	0.675809	-1.94455	4.94308e-06	-1.49096	0.000992513	-1.50415	0.000874865
CJJ81176_RS05940	Cj1222c	two-component sensor (histidine kinase)	-0.364155	0.721948	-0.319743	0.666626	-0.185638	0.827102	-0.175227	0.845145
CJJ81176_RS05945	Cj1223c	two-component regulator	-0.386384	0.688432	0.0231913	0.975706	0.530057	0.438514	0.651567	0.316433
CJJ81176_RS05950	Cj1224	putative iron-binding protein	-2.66259	2.23202e-06	-1.85053	9.79333e-05	-0.397726	0.519811	-0.611468	0.292704
CJJ81176_RS05955	Cj1225	conserved hypothetical protein Cj1225	-1.78179	0.044494	-1.05038	0.161542	-0.118844	0.910475	0.0708003	0.949201
CJJ81176_RS05965	Cj1226c	putative two-component sensor (histidine kinase)	0.643994	0.426298	2.08461	0.000335393	1.45606	0.0253419	1.5997	0.0113413
CJJ81176_RS05970	Cj1227c	putative two-component regulator	0.708644	0.170018	0.533975	0.271735	0.43404	0.434608	0.503972	0.349872
CJJ81176_RS05975	Cj1228c	serine protease (protease DO)	-0.899489	0.359455	-0.0635357	0.952604	0.333906	0.759929	0.263036	0.827076
CJJ81176_RS05980	Cj1229	putative curved-DNA binding protein	-0.0612659	0.942536	-0.29552	0.474897	0.199856	0.670245	0.395956	0.360743
CJJ81176_RS05985	Cj1230	heat shock transcriptional regulator	-0.281756	0.759177	-0.597387	0.34222	-0.0299595	0.973819	0.0775125	0.932298
CJJ81176_RS05990	Cj1231	putative glutathione-regulated potassium-efflux system protein	-0.707641	0.283086	-0.783708	0.145993	-0.924351	0.0994393	-0.789271	0.167053
CJJ81176_RS05995	Cj1232	hypothetical protein Cj1232	0	1	0.891321	0.31671	0.269405	NA	0	1
CJJ81176_RS06000	Cj1233	putative HAD-superfamily hydrolase	-0.00377097	1	1.40716	0.197843	0.36652	0.794798	-0.310521	0.840637
CJJ81176_RS06005	Cj1234	glycyl-tRNA synthetase beta chain	-0.63	0.118977	-0.179248	0.628951	-0.247659	0.532224	-0.016806	0.975729
CJJ81176_RS06010	Cj1235	putative peptidase M23 family protein	0.574013	0.543109	0.704967	0.33314	0.107527	0.916624	0.00673478	1
CJJ81176_RS06015	Cj1236	conserved hypothetical protein Cj1236	0.442835	0.775904	1.40987	0.151679	0.381928	0.763377	0.687644	0.569645
CJJ81176_RS06020	Cj1237c	putative phosphatase	0.40321	0.757014	1.11742	0.151013	1.92041	0.00765046	1.99758	0.00437981
CJJ81176_RS06025	Cj1238	pyridoxal phosphate biosynthetic protein	-1.6202	0.00303001	-0.996542	0.0333446	-0.302524	0.60241	-0.443345	0.427022
CJJ81176_RS06030	Cj1239	putative 4-hydroxythreonine-4-phosphate dehydrogenase	-0.412977	0.585495	-0.616609	0.254144	-0.539934	0.368844	-0.633751	0.269522
CJJ81176_RS06040	Cj1241	putative MFS (Major Facilitator Superfamily) transporter protein	-0.56968	0.593371	0.13754	0.878626	-0.541585	0.532401	-0.583542	0.49376
CJJ81176_RS06045	Cj1242	hypothetical protein Cj1242	0.0176507	0.997681	0.549882	0.464545	1.8671	0.0045794	1.03486	0.167918
CJJ81176_RS06050	Cj1243	uroporphyrinogen decarboxylase	-0.682455	0.143951	-0.107458	0.829222	0.130913	0.80538	0.151148	0.780108
CJJ81176_RS06055	Cj1244	putative radical SAM domain protein	0.291591	0.698891	-0.209581	0.718054	-0.670309	0.238201	-0.269921	0.668728
CJJ81176_RS06060	Cj1245c	putative membrane protein	1.68336	0.0255483	1.69261	0.0119316	1.11238	0.160997	1.55421	0.0301783
CJJ81176_RS06065	Cj1246c	excinuclease ABC subunit C	1.10811	0.170977	1.83292	0.00364752	1.23901	0.0881628	1.35382	0.0560389
CJJ81176_RS06070	Cj1247c	hypothetical protein Cj1247c	0.405889	0.708671	1.70683	0.00471631	1.49357	0.0230511	1.65116	0.00861365
CJJ81176_RS06075	Cj1248	GMP synthase (glutamine-hydrolyzing)	0.236153	0.640535	-0.182242	0.656902	-0.236559	0.585597	-0.0456005	0.934615
CJJ81176_RS06080	Cj1249	hypothetical protein Cj1249	0.243173	0.724672	0.0309394	0.957638	0.0301953	0.96709	-0.0164937	0.985419
CJJ81176_RS06085	Cj1250	phosphoribosylamine--glycine ligase	-0.179227	0.714366	-0.554067	0.0931007	-0.0908309	0.835425	-0.22578	0.585637
CJJ81176_RS06090	Cj1251	conserved hypothetical protein Cj1251	-0.165244	0.868936	-0.292879	0.644193	-0.584524	0.368844	-0.55355	0.394564
CJJ81176_RS06095	Cj1252	putative periplasmic protein	0.757783	0.230336	1.03487	0.052616	0.000918564	0.998334	-0.113188	0.890775
CJJ81176_RS06100	Cj1253	polyribonucleotide nucleotidyltransferase	1.34172	4.2783e-07	0.406581	0.179782	0.101792	0.794602	0.0244916	0.960221
CJJ81176_RS06105	Cj1254	hypothetical protein Cj1254	0.872843	0.432768	0.867976	0.336455	0.183884	0.883466	0.155434	0.905412
CJJ81176_RS06110	Cj1255	putative isomerase	-1.3071	0.163101	-0.958399	0.230276	-0.234737	0.812582	-0.50693	0.585637
CJJ81176_RS06115	Cj1256c	putative membrane protein	-0.0221202	0.994794	1.24131	0.0127801	1.17577	0.0275581	1.40525	0.0050458
CJJ81176_RS06120	Cj1257c	putative efflux pump	-0.61751	0.231269	-0.437522	0.313541	-0.877112	0.0385599	-0.913083	0.0268799
CJJ81176_RS06125	Cj1258	putative phosphotyrosine protein phosphatase	-0.426894	0.640379	-0.864734	0.178557	-0.521537	0.484834	-0.262098	0.746285
CJJ81176_RS06130	Cj1259	major outer membrane protein	-0.674038	0.222475	-2.12952	7.40368e-07	-1.50831	0.00109616	-1.55357	0.000721167
CJJ81176_RS06135	Cj1260c	chaperone DnaJ	0.708754	0.275138	1.44682	0.00256612	0.790046	0.177023	0.525425	0.40282
CJJ81176_RS06140	Cj1261	two-component regulator	-0.953045	0.179367	-1.6072	0.00716584	-1.27346	0.0535761	-1.23118	0.0665229
CJJ81176_RS06145	Cj1262	two-component sensor (histidine kinase)	-0.100514	0.9264	0.610573	0.236996	-0.61247	0.296609	-0.23921	0.713743
CJJ81176_RS06150	Cj1263	recombination protein	0.956554	0.289019	-0.50254	0.56873	-1.21896	0.168784	-0.754359	0.416498
CJJ81176_RS06155	Cj1264c	putative hydrogenase maturation protease	0.00572314	1	-2.29561	5.39477e-08	-2.59254	9.62399e-10	-2.13	4.44311e-07
CJJ81176_RS06160	Cj1265c	Ni/Fe-hydrogenase B-type cytochrome subunit	-0.990206	0.00125879	-3.13591	2.94553e-30	-2.39372	1.83111e-18	-2.3983	7.94652e-19
CJJ81176_RS06165	Cj1266c	Ni/Fe-hydrogenase large subunit	-0.998105	0.0011283	-3.21641	2.92503e-32	-2.58177	2.97477e-21	-2.6667	9.9062e-23
CJJ81176_RS06170	Cj1267c	Ni/Fe-hydrogenase small chain	-0.971944	0.00438006	-3.20888	2.19378e-27	-2.2274	1.1933e-13	-2.17132	4.7509e-13
CJJ81176_RS06175	Cj1268c	putative FAD dependent oxidoreductase	1.33921	0.168762	1.90382	0.0127801	1.47472	0.0856313	1.43103	0.0939915
CJJ81176_RS06180	Cj1269c	N-acetylmuramoyl-L-alanine amidase	0.912734	0.0461395	0.985147	0.0136248	0.292174	0.577772	0.555129	0.243458
CJJ81176_RS06185	Cj1270c	putative 2-nitropropane dioxygenase,oxidoreductase protein	0.0904923	0.905045	-0.409742	0.331391	-0.535238	0.237911	-0.606762	0.162951
CJJ81176_RS06190	Cj1271c	tyrosyl-tRNA synthetase	-0.590383	0.147217	-0.259309	0.506613	-0.151904	0.745954	-0.153997	0.742813
CJJ81176_RS06195	Cj1272c	putative guanosine-3',5'-bis(diphosphate) 3'-pyrophosphohydrolase	-0.154612	0.812037	0.051265	0.925617	-0.43319	0.353233	-0.414471	0.374189
CJJ81176_RS06200	Cj1273c	putative DNA-directed RNA polymerase omega chain	-0.0807599	0.928667	-0.931728	0.0236475	-0.53344	0.267545	-0.532687	0.262932
CJJ81176_RS06205	Cj1274c	uridylate kinase	0.178136	0.859103	-0.0126127	0.986295	0.223697	0.763377	0.113524	0.896337
CJJ81176_RS06210	Cj1275c	putative peptidase M23 family protein	0.0170026	0.997681	0.330777	0.61689	0.222587	0.763377	0.015916	0.992623
CJJ81176_RS06215	Cj1276c	putative integral membrane protein	-0.0810791	0.970847	-0.502784	0.554328	-0.636143	0.489306	-0.650471	0.476132
CJJ81176_RS06220	Cj1277c	putative ABC transporter ATP-binding protein	-0.349512	0.702204	0.0849167	0.911798	-0.194917	0.799998	0.366242	0.607972
CJJ81176_RS06225	Cj1278c	putative tRNA (guanine-N(7)-)-methyltransferase	-0.148686	0.919492	0.15673	0.871465	-0.0980703	0.932308	0.20137	0.851238
CJJ81176_RS06230	Cj1279c	putative fibronectin domain-containing lipoprotein	-0.103291	0.916031	-0.413024	0.446229	-0.301234	0.623346	-0.0934871	0.900084
CJJ81176_RS06235	Cj1280c	putative ribosomal pseudouridine synthase	0.669917	0.26886	0.781191	0.12418	0.260428	0.684076	0.527386	0.368996
CJJ81176_RS06240	Cj1282	RodA protein homolog	0.0745466	0.970652	0.503759	0.462816	-0.405493	0.610876	-0.211083	0.816657
CJJ81176_RS06255	Cj1283	putative K+ uptake protein	1.75502	0.0294767	2.13994	0.00200051	1.71308	0.0254258	1.28647	0.111501
CJJ81176_RS06260	Cj1284	putative K+ uptake protein	1.69511	0.0593524	2.65094	0.000283822	1.47028	0.090995	1.25656	0.162059
CJJ81176_RS06265	Cj1285c	conserved hypothetical protein Cj1285c	-0.0575234	0.980441	0.797357	0.17813	0.347145	0.62803	0.655172	0.317186
CJJ81176_RS06270	Cj1286c	uracil phosphoribosyltransferase	0.0806574	0.934562	0.0807761	0.88599	-0.0979336	0.8751	0.0217264	0.978436
CJJ81176_RS06275	Cj1287c	malate oxidoreductase	0.0430739	0.978739	-0.141038	0.815667	0.0401296	0.956637	0.0364465	0.964846
CJJ81176_RS06280	Cj1288c	glutamyl-tRNA synthetase	-0.082575	0.941152	0.371383	0.520721	0.529487	0.393923	0.459473	0.465014
CJJ81176_RS06285	Cj1289	possible periplasmic protein	-0.285073	0.667141	-0.26916	0.59409	0.0584305	0.932308	0.135505	0.831833
CJJ81176_RS06290	Cj1290c	biotin carboxylase	-0.149876	0.794328	-0.28643	0.47728	-0.631938	0.10832	-0.542952	0.179617
CJJ81176_RS06295	Cj1291c	putative biotin carboxyl carrier protein of acetyl-CoA carboxylase	-0.366728	0.475103	-0.653178	0.105806	-0.983047	0.0143174	-0.897812	0.0268015
CJJ81176_RS06300	Cj1292	putative deoxycytidine triphosphate deaminase	-0.660558	0.206264	-0.728814	0.100723	-0.51081	0.318198	-0.543722	0.275083
CJJ81176_RS06305	Cj1293	UDP-GlcNAc-specific C4,6 dehydratase/C5 epimerase	-0.785703	0.0727309	-1.08601	0.0041118	-0.459585	0.329877	-0.580988	0.193001
CJJ81176_RS06310	Cj1294	C4 aminotransferase specific for PseB product	-0.236678	0.691528	-0.532066	0.199185	-0.312023	0.519811	-0.460709	0.315078
CJJ81176_RS06320	n/a	SAM-dependent methyltransferase	0.99136	0.227312	0.324595	0.682958	0.883825	0.238201	1.00696	0.157922
CJJ81176_RS06325	n/a	N-acetyltransferase	0.315155	0.675809	0.640527	0.212392	0.989973	0.050929	1.03611	0.0373622
CJJ81176_RS06330	Cj1299	putative acyl carrier protein	-0.023228	0.997681	-0.627543	0.46557	-0.495704	0.604622	-0.47566	0.626652
CJJ81176_RS06335	n/a	hypothetical protein	1.20292	0.0427584	1.27838	0.0130294	1.10643	0.0491376	1.3135	0.0133862
CJJ81176_RS06340	Cj1302	putative HAD-superfamily phosphatase, subfamily IIIC	1.13872	0.0258204	1.24309	0.00471631	0.869669	0.0840977	0.749963	0.143436
CJJ81176_RS06345	Cj1303	putative 3-oxoacyl-[acyl-carrier-protein] synthase	0.742606	0.0900254	0.807854	0.0291964	0.433612	0.338478	0.638457	0.116916
CJJ81176_RS06350	Cj1304	putative acyl carrier protein	0.603312	0.409882	1.1868	0.022195	1.55781	0.00215655	1.74748	0.00035212
CJJ81176_RS06355	Cj1306c	hypothetical protein Cj1306c (617 family)	-0.0633094	0.957135	-0.0395829	0.947945	-0.204266	0.724445	-0.228117	0.691337
CJJ81176_RS06360	Cj1307	putative amino acid activating enzyme	-0.552117	0.323496	-0.224946	0.66337	0.33184	0.538254	0.416671	0.424292
CJJ81176_RS06365	n/a	acetyltransferase	0.687301	0.519487	0.428111	0.628951	0.572383	0.53851	0.546411	0.559542
CJJ81176_RS06375	n/a	acyl carrier protein	-1.27077	0.11656	0.299568	0.647192	0.61617	0.344865	0.824194	0.171395
CJJ81176_RS06380	Cj1310c	hypothetical protein Cj1310c (617 family)	0.0246621	0.990378	-0.408711	0.383392	-0.418451	0.420421	-0.236404	0.66376
CJJ81176_RS06385	Cj1311	putative acylneuraminate cytidylyltransferase	-1.15055	0.104205	-0.759127	0.221701	-0.0164566	0.98094	0.172784	0.834654
CJJ81176_RS06390	Cj1312	nucleotidase specific for PseC product,UDP-4-amino-4,6-dideoxy-beta-L-AltNAc	-1.54522	0.0413657	-1.25817	0.0565588	-0.891441	0.237911	-0.860851	0.246997
CJJ81176_RS06395	Cj1313	N-acetyltransferase specific for PseC product,UDP-4-amino-4,6-dideoxy-beta-L-AltNAc	-0.261766	0.896053	0.800023	0.483069	-0.42223	0.76027	0.436043	0.754966
CJJ81176_RS06400	Cj1314c	imidazole glycerol phosphate synthase subunit	0.419872	0.63768	1.02746	0.077207	1.0877	0.0770417	0.768557	0.243458
CJJ81176_RS06405	Cj1315c	imidazole glycerol phosphate synthase subunit	0.176049	0.844554	0.714233	0.151679	0.967303	0.0531468	0.809589	0.11559
CJJ81176_RS06410	Cj1316c	pseudaminic acid biosynthesis PseA protein	0.0590309	0.950953	0.208595	0.654973	0.552474	0.224662	0.546228	0.225025
CJJ81176_RS06415	Cj1317	Pse synthetase	-0.342776	0.540226	-0.939888	0.015008	-0.935365	0.021725	-0.740697	0.0745604
CJJ81176_RS06420	Cj1334	motility accessory factor (function unknown)	-0.407227	0.636907	-0.508064	0.414546	-0.525751	0.444377	-0.62209	0.347843
CJJ81176_RS06425	Cj1335	motility accessory factor (function unknown)	0.912246	0.12296	0.724731	0.173509	1.07836	0.0389326	1.1849	0.0188975
CJJ81176_RS06430	Cj1337	PseE protein	0.13748	0.851079	-0.821919	0.045361	-0.440807	0.365756	-0.510999	0.273768
CJJ81176_RS06435	Cj1338c	flagellin	-0.848024	0.190537	-1.36791	0.0133584	-0.953128	0.131722	-1.14275	0.0623954
CJJ81176_RS06440	Cj1339c	flagellin	-0.804461	0.230336	-1.46495	0.00857799	-0.946222	0.145621	-1.05398	0.0947439
CJJ81176_RS06445	n/a	motility accessory factor	1.62029	0.000808733	0.758111	0.13508	1.10182	0.0264407	1.39737	0.00221405
CJJ81176_RS06450	Cj1342c	motility accessory factor (function unknown)	0.927256	0.067701	0.223996	0.682958	0.175362	0.775303	0.106511	0.879145
CJJ81176_RS06455	Cj1343c	putative periplasmic protein	0.29218	0.786551	0.356925	0.633051	0.0598876	0.951715	-0.017315	0.992623
CJJ81176_RS06460	Cj1344c	putative glycoprotease	-0.112882	0.911744	0.0451405	0.945905	0.0574803	0.938789	0.293209	0.619751
CJJ81176_RS06465	Cj1345c	putative periplasmic protein	-0.435899	0.366236	-1.2474	0.000723677	-0.777366	0.0623492	-0.646168	0.133456
CJJ81176_RS06470	Cj1346c	1-deoxy-D-xylulose 5-phosphate reductoisomerase	-0.451851	0.368989	-0.299741	0.470098	-0.3801	0.401841	-0.0514217	0.928191
CJJ81176_RS06475	Cj1347c	phosphatidate cytidylyltransferase	-0.325069	0.506452	-1.16912	0.000570029	-1.17653	0.000717758	-1.12557	0.000940997
CJJ81176_RS06480	Cj1348c	putative coiled-coil protein	-0.191297	0.803543	-0.722423	0.133724	-0.351629	0.53851	-0.436302	0.430591
CJJ81176_RS06485	Cj1349c	putative fibronectin/fibrinogen-binding protein	-0.784348	0.442609	1.09267	0.106476	1.29694	0.062075	1.41325	0.0365732
CJJ81176_RS06490	Cj1350	putative molybdopterin-guanine dinucleotide biosynthesis protein	-1.41527	0.178118	0.584397	0.477051	0.196146	0.848086	0.211629	0.842204
CJJ81176_RS06495	Cj1351	phospholipase A	0.671207	0.458254	0.350408	0.65827	-0.167939	0.862727	0.261579	0.776912
CJJ81176_RS06500	Cj1352	enterochelin uptake permease	1.40995	0.199685	3.43317	9.79476e-06	3.03917	0.000185674	3.22602	4.63816e-05
CJJ81176_RS06505	Cj1353	enterochelin uptake permease	0.101656	0.976051	2.7729	0.00197298	1.88864	0.0665455	2.27438	0.0194706
CJJ81176_RS06510	Cj1354	enterochelin uptake ATP-binding protein	0	1	2.98037	0.000733698	3.02236	0.000833909	3.05839	0.000619273
CJJ81176_RS06515	Cj1355	enterochelin uptake periplasmic binding protein	0.760135	0.17477	2.62319	1.35521e-11	2.41964	9.02558e-10	2.28659	6.98747e-09
CJJ81176_RS06520	n/a	hypothetical protein	-1.23066	0.314284	-0.4834	0.692154	-0.170672	0.912904	-0.403202	0.777211
CJJ81176_RS06525	n/a	plasmid stabilization protein	-0.595096	0.641317	-0.392562	0.742537	-0.361383	NA	-0.132654	0.934615
CJJ81176_RS06535	Cj1356c	putative integral membrane protein	-2.02162	0.00351489	-2.34298	9.79333e-05	-2.52476	3.40475e-05	-2.45271	3.65318e-05
CJJ81176_RS06540	Cj1357c	putative periplasmic cytochrome C	-1.62811	0.00809279	-3.28635	1.37493e-09	-3.22095	4.18519e-09	-3.63566	1.69404e-11
CJJ81176_RS06545	Cj1358c	putative periplasmic cytochrome C	-1.18963	0.00732785	-3.55758	5.17368e-18	-3.69612	1.36204e-19	-4.05261	1.4714e-23
CJJ81176_RS06550	Cj1359	polyphosphate kinase	-1.99659	2.20571e-06	-1.60721	4.65428e-05	-1.29847	0.00184381	-1.14993	0.00657696
CJJ81176_RS06555	Cj1361c	hypothetical protein Cj1361c	-1.14141	0.356023	-2.04678	0.0462641	-2.08619	0.054626	-1.9724	0.0751241
CJJ81176_RS06560	Cj1362	holliday junction DNA helicase	0.682074	0.406187	0.225103	0.785155	-0.0719982	0.942322	0.0615036	0.956822
CJJ81176_RS06565	Cj1363	acid membrane antigen A	1.03103	0.112922	0.276398	0.682958	-0.11879	0.892409	0.0647329	0.941543
CJJ81176_RS06570	Cj1364c	fumarate hydratase	0.0277018	0.985768	-0.723169	0.0584296	-0.558242	0.201557	-0.365469	0.431918
CJJ81176_RS06575	Cj1365c	putative secreted serine protease	0.739468	0.0258204	0.825825	0.00459888	0.502699	0.145607	0.808222	0.00777858
CJJ81176_RS06580	Cj1366c	glucosamine--fructose-6-phosphate aminotransferase (isomerizing)	0.41025	0.239661	0.17611	0.606082	0.0325723	0.941757	0.289587	0.416106
CJJ81176_RS06585	Cj1367c	putative nucleotidyltransferase	0.398152	0.604994	1.88228	1.24964e-05	1.75496	8.02515e-05	1.71247	0.000100937
CJJ81176_RS06590	Cj1368	putative radical SAM domain protein	0.719531	0.0887614	-0.577075	0.155863	-0.375357	0.429914	-0.457218	0.315078
CJJ81176_RS06595	n/a	peptidase S8	0.357353	0.415127	-0.0954907	0.829401	-0.669344	0.0770977	-0.75232	0.0404213
CJJ81176_RS06600	Cj1369	putative permease	0.158532	0.800526	-0.69166	0.0765222	-1.21647	0.00126134	-1.05838	0.0050125
CJJ81176_RS06605	Cj1370	putative nucleotide phosphoribosyltransferase	0.00257134	1	0.76765	0.265806	0.638698	0.41644	0.14878	0.879145
CJJ81176_RS06610	Cj1371	putative periplasmic protein (VacJ homolog)	0.510282	0.573911	-0.301829	0.699498	-0.722322	0.366043	-0.672235	0.40282
CJJ81176_RS06615	Cj1372	putative periplasmic protein	-0.521204	0.675809	1.4523	0.0401655	0.981169	0.238027	0.709126	0.416106
CJJ81176_RS06620	Cj1373	putative ntegral membrane protein	0.771425	0.364613	0.60654	0.415088	-0.280445	0.76027	0.352168	0.694213
CJJ81176_RS06625	Cj1374c	conserved hypothetical protein Cj1374c	1.14658	0.283581	2.48137	0.00110252	1.79533	0.0361186	1.58525	0.0719779
CJJ81176_RS06630	Cj1375	putative multidrug efflux transporter	0.121175	0.901984	0.109431	0.861153	0.454033	0.435929	0.263562	0.670519
CJJ81176_RS06635	Cj1377c	putative ferredoxin	-1.00155	0.0225916	-0.558931	0.152876	-0.178357	0.714205	-0.237991	0.61293
CJJ81176_RS06640	Cj1378	L-seryl-tRNA(SeC) selenium transferase	0.394707	0.636907	1.05329	0.0382436	0.937371	0.0898763	0.945007	0.0832062
CJJ81176_RS06645	Cj1379	putative selenocysteine-specific elongation factor	0.111599	0.95776	0.951143	0.241897	0.218095	0.835425	1.10858	0.188772
CJJ81176_RS06650	Cj1380	putative periplasmic protein	-0.178755	0.853968	-0.57185	0.341108	-0.523201	0.44123	-0.202301	0.796693
CJJ81176_RS06655	Cj1381	putative lipoprotein	1.41633	0.0674583	-0.689204	0.395863	-0.518299	0.568417	-0.73442	0.40776
CJJ81176_RS06660	Cj1382c	flavodoxin	-0.713612	0.125081	0.384226	0.404111	0.93419	0.0299437	0.475575	0.335415
CJJ81176_RS06665	Cj1383c	hypothetical protein Cj1383c	0.289746	0.815952	3.78307	5.44701e-12	4.72883	2.06891e-18	4.25398	5.434e-15
CJJ81176_RS06670	Cj1384c	hypothetical protein Cj1384c	0.907257	0.311119	4.12002	3.30192e-12	5.06935	4.04463e-18	5.09862	2.43975e-18
CJJ81176_RS06675	Cj1385	catalase	0.334961	0.754598	3.00546	8.76808e-07	5.37436	3.85002e-20	5.34704	5.26561e-20
CJJ81176_RS06680	Cj1386	ankyrin-repeat containing protein	-0.0527834	0.990378	1.28693	0.0791646	3.97993	5.79236e-11	3.96046	6.23843e-11
CJJ81176_RS06685	Cj1387c	helix-turn-helix containing protein	-0.420446	0.735521	-0.0560823	0.952604	0.625485	0.471399	0.0465386	0.971121
CJJ81176_RS06690	Cj1388	putative endoribonuclease L-PSP	-0.452878	0.723083	0.604422	0.52404	0.902398	0.368844	1.08658	0.262149
CJJ81176_RS06695	Cj1389	C4-dicarboxylate ABC transporter	-0.584449	0.417008	-0.300404	0.656902	-0.0763406	0.932361	-0.112636	0.898261
CJJ81176_RS06700	Cj1393	putative cystathionine beta-lyase	-0.822695	0.267443	-0.797676	0.235338	-0.232817	0.780039	-0.352649	0.670309
CJJ81176_RS06705	Cj1394	putative fumarate lyase	-1.11226	0.148036	-0.942674	0.193348	-0.326148	0.72071	-0.487385	0.579265
CJJ81176_RS06710	Cj1395	2-methylcitrate dehydratase	-1.22584	0.114485	-0.689398	0.363869	-0.253509	0.783028	-0.393962	0.66376
CJJ81176_RS06725	Cj1399c	putative Ni/Fe-hydrogenase small subunit	-0.427287	0.396521	-0.87095	0.026914	-1.01723	0.0124002	-1.05408	0.00788783
CJJ81176_RS06730	Cj1400c	enoyl-[acyl-carrier-protein] reductase [NADH]	-0.356772	0.51909	-0.687618	0.105806	-0.535031	0.26588	-0.685776	0.130695
CJJ81176_RS06735	Cj1401c	putative triosephosphate isomerase	-0.887841	0.356023	-0.139391	0.894227	-0.22069	0.836714	-0.229012	0.842204
CJJ81176_RS06740	Cj1402c	phosphoglycerate kinase	-0.20816	0.724299	-1.01809	0.00688894	-0.910868	0.0253419	-1.0339	0.00833793
CJJ81176_RS06745	Cj1403c	glyceraldehyde 3-phosphate dehydrogenase	-0.10437	0.840048	-1.00613	0.000334167	-0.396362	0.257217	-0.458648	0.171998
CJJ81176_RS06750	Cj1404	putative nicotinate-nucleotide adenylyltransferase	0.463892	0.733042	1.40521	0.083727	1.7291	0.0347896	1.84926	0.0197844
CJJ81176_RS06755	Cj1405	conserved hypothetical protein Cj1405	-0.108023	0.938853	0.582031	0.364867	1.09959	0.0770417	1.27708	0.0315844
CJJ81176_RS06760	n/a	hypothetical protein	0.321511	0.767399	-0.0280781	0.975706	0.593598	0.480932	0.94283	0.218835
CJJ81176_RS06765	Cj1407c	putative phospho-sugar mutase	0.439384	0.355663	0.266641	0.537917	0.379807	0.413899	0.426121	0.341473
CJJ81176_RS06770	Cj1408	putative flagellar protein	-0.105959	0.897187	-0.250862	0.608254	-0.0245871	0.971146	0.175315	0.763763
CJJ81176_RS06775	Cj1409	holo-[acyl-carrier protein] synthase	0.0508422	0.983652	0.932395	0.107189	0.402046	0.572502	0.473825	0.500767
CJJ81176_RS06780	Cj1410c	putative membrane protein	0.288451	0.811759	-0.117146	0.904369	-0.0934448	0.935531	-0.299021	0.763763
CJJ81176_RS06785	Cj1411c	putative cytochrome P450	-0.0822213	0.911744	-0.349732	0.380411	-0.413149	0.338698	-0.303507	0.496197
CJJ81176_RS06790	Cj1412c	putative integral membrane protein	0.59045	0.442609	0.46912	0.46123	0.378357	0.595176	0.94875	0.117232
CJJ81176_RS06795	Cj1413c	capsule polysaccharide modification protein	0.43115	0.617196	0.933262	0.0917531	0.463879	0.493718	0.957916	0.0967212
CJJ81176_RS06800	Cj1414c	capsule polysaccharide modification protein	0.529052	0.637688	0.477076	0.59409	-0.183172	0.870974	0.369283	0.721049
CJJ81176_RS06805	Cj1415c	putative adenylylsulfate kinase	0.874797	0.329778	0.322275	0.714018	0.734361	0.413899	0.743915	0.40366
CJJ81176_RS06810	Cj1416c	putative sugar nucleotidyltransferase	0.168459	0.861122	0.126749	0.854113	0.0806332	0.919615	0.163975	0.834299
CJJ81176_RS06815	Cj1417c	putative amidotransferase	0.0807677	0.970847	1.17346	0.105777	0.496264	0.577772	0.773576	0.363043
CJJ81176_RS06820	Cj1418c	putative transferase	0.312785	0.484918	0.666551	0.0426135	0.336294	0.407891	0.502258	0.171998
CJJ81176_RS06825	Cj1419c	putative methyltransferase	0.279207	0.688432	-0.393405	0.456879	-0.151778	0.813373	-0.347614	0.564656
CJJ81176_RS06830	Cj1420c	putative methyltransferase	0.126014	0.868628	-0.724122	0.100841	-0.0277249	0.968237	-0.129312	0.839124
CJJ81176_RS06835	n/a	sugar transferase	1.49645	0.0055659	0.962762	0.0699869	0.885793	0.126965	1.36091	0.00802482
CJJ81176_RS06840	n/a	sugar transferase	0.220259	0.901984	-0.0496262	0.966927	-0.167575	0.902391	-0.300589	0.818204
CJJ81176_RS06845	Cj1423c	putative D-glycero-D-manno-heptose 1-phosphate guanosyltransferase	0.35081	0.675809	1.34929	0.00740934	0.6566	0.296151	0.702567	0.250617
CJJ81176_RS06850	Cj1424c	phosphoheptose isomerase	-0.0127111	0.997939	-0.177942	0.784077	-0.0115513	0.98433	-0.224308	0.750293
CJJ81176_RS06855	Cj1425c	putative D-glycero-D-manno-heptose 7-phosphate kinase	0.148207	0.873907	0.18372	0.771687	-0.372112	0.556318	-0.321379	0.626652
CJJ81176_RS06860	n/a	membrane protein	-0.0172434	0.997681	-1.17884	0.0622979	-1.46416	0.0248568	-1.57791	0.0126237
CJJ81176_RS06865	n/a	GDP-mannose 4,6-dehydratase	-0.447692	0.258681	-0.610313	0.0641663	-0.633358	0.0708728	-0.487555	0.181744
CJJ81176_RS06870	n/a	GDP-fucose synthetase	-0.187766	0.724672	-0.0675264	0.88325	-0.012425	0.980269	0.0453602	0.934615
CJJ81176_RS06875	n/a	hypothetical protein	-0.650105	0.410703	0.134062	0.872687	0.409115	0.604473	0.319585	0.702297
CJJ81176_RS06880	n/a	hypothetical protein	0.0820794	0.945933	-0.37568	0.523679	-0.0204966	0.979692	0.0139805	0.992623
CJJ81176_RS06885	n/a	dTDP-4-dehydrorhamnose 3,5-epimerase	0.00924907	1	0.372443	0.465852	0.284541	0.621844	0.300096	0.605314
CJJ81176_RS06890	n/a	sugar transferase	0.135828	0.904049	-0.461343	0.47304	0.158003	0.837831	0.161301	0.845584
CJJ81176_RS06895	n/a	glycosyl transferase family A	0.291143	0.76931	0.101436	0.905826	-0.0411966	0.968237	0.129655	0.894123
CJJ81176_RS06900	n/a	glycosyl transferase	-0.0729111	0.941152	-0.0528906	0.930948	0.462147	0.359852	0.39122	0.447735
CJJ81176_RS06905	n/a	sugar transferase	-1.62273	0.000665894	-0.632538	0.207826	0.435523	0.451334	0.264917	0.669956
CJJ81176_RS06910	n/a	sugar transferase	0.947824	0.181177	0.0367294	0.963103	-0.325825	0.683137	0.00975073	0.999887
CJJ81176_RS06915	n/a	capsular polysaccharide biosynthesis protein	1.04675	0.0716744	0.789934	0.137125	0.605839	0.319026	0.627656	0.290455
CJJ81176_RS06920	Cj1443c	D-arabinose 5-phosphate isomerase	0.00982641	0.997681	-0.230605	0.602103	-0.711825	0.0856313	-0.468235	0.292319
CJJ81176_RS06925	Cj1444c	capsule polysaccharide export system periplasmic protein	-0.0982577	0.891578	0.61262	0.0922591	0.635076	0.0995447	0.634841	0.0990145
CJJ81176_RS06930	Cj1445c	capsule polysaccharide export system inner membrane protein	-0.862259	0.170977	-0.320661	0.606398	-0.102455	0.900124	-0.0325324	0.974607
CJJ81176_RS06935	Cj1447c	capsule polysaccharide export ATP-binding protein	1.35443	0.0339636	1.39251	0.0126486	0.40632	0.583698	0.356772	0.640123
CJJ81176_RS06940	Cj1448c	capsule polysaccharide export system inner membrane protein	1.17254	0.132716	0.367562	0.654636	0.700919	0.408079	0.528294	0.54555
CJJ81176_RS06945	Cj1449c	hypothetical protein Cj1449c	0.661706	0.485428	1.07287	0.122398	1.02505	0.177023	1.21967	0.0869177
CJJ81176_RS06950	Cj1450	putative ATP/GTP-binding protein	-0.45998	0.364844	-1.14912	0.00295301	0.293258	0.551755	0.0383405	0.955896
CJJ81176_RS06955	Cj1451	dUTPase	9.79414e-05	1	-0.419752	0.2814	0.20117	0.661005	0.146496	0.768832
CJJ81176_RS06960	Cj1452	putative integral membrane protein	1.30309	0.0639967	0.174282	0.831516	-0.515516	0.535092	-0.985015	0.190322
CJJ81176_RS06965	Cj1453c	putative tRNA(Ile)-lysidine synthase	1.79425	0.0604634	1.48119	0.0899674	0.826441	0.438514	0.729044	0.498756
CJJ81176_RS06970	Cj1454c	putative radical SAM domain family protein	0.922511	0.193854	0.870857	0.155863	0.828383	0.221744	0.604441	0.394564
CJJ81176_RS06975	Cj1455	peptide chain release factor 2	0.348325	0.715006	0.1061	0.900191	-0.388393	0.626762	-0.452653	0.575464
CJJ81176_RS06980	Cj1456c	putative periplasmic protein	0.922522	0.345432	1.42908	0.0502565	1.90708	0.00752578	2.23195	0.000917075
CJJ81176_RS06985	Cj1457c	tRNA pseudouridine synthase D	0.72209	0.342762	1.5246	0.00364752	0.947759	0.126554	1.02372	0.0869177
CJJ81176_RS06990	Cj1458c	putative thiamin-monophosphate kinase	0.476186	0.692924	1.07815	0.17656	1.07578	0.218219	1.24967	0.128928
CJJ81176_RS06995	Cj1459	hypothetical protein Cj1459	-1.25359	0.0257565	-0.195762	0.739931	0.611079	0.272143	0.705193	0.188163
CJJ81176_RS07000	Cj1460	hypothetical protein Cj1460	-0.910733	0.267349	-0.355797	0.597906	0.0329344	0.971146	0.0697949	0.936491
CJJ81176_RS07005	Cj1461	putative DNA methylase	0.920625	0.283581	0.753999	0.305878	0.28503	0.758913	0.210922	0.834299
CJJ81176_RS07010	Cj1462	flagellar P-ring protein	-0.841017	0.0773573	-1.64103	3.4051e-05	-0.375054	0.480812	-0.440026	0.394564
CJJ81176_RS07015	Cj1463	hypothetical protein Cj1463	-0.73557	0.295005	0.0617126	0.931183	0.279149	0.67245	0.172692	0.816687
CJJ81176_RS07020	Cj1464	hypothetical protein Cj1464	0.309699	0.701003	-0.737671	0.199185	0.867434	0.150819	0.985638	0.0898997
CJJ81176_RS07025	Cj1465	hypothetical protein Cj1465	0.0356624	0.98857	-0.096059	0.88325	0.230159	0.730948	0.334523	0.603626
CJJ81176_RS07030	Cj1466	putative flagellar hook-associated protein	-0.134931	0.848366	-0.436494	0.318143	-0.244451	0.629964	-0.270835	0.601852
CJJ81176_RS07040	Cj1468	putative integral membrane protein	-1.8282	0.00146404	-2.713	9.27051e-08	-2.53916	6.19366e-07	-1.8544	0.000284391
CJJ81176_RS07045	Cj1470c	general secretion pathway protein GspF	-0.0359349	0.995246	0.86884	0.406934	-0.26355	0.840866	0.198669	0.891562
CJJ81176_RS07050	Cj1471c	putative type II protein secretion system E protein	1.03309	0.302862	0.294333	0.773915	-0.18612	0.876697	0.447624	0.673154
CJJ81176_RS07055	Cj1472c	putative membrane protein	1.23289	0.326462	1.01358	0.379056	0.483145	0.730884	0.262605	0.868925
CJJ81176_RS07060	Cj1473c	putative ATP/GTP-binding protein	-0.0424178	0.994794	-0.341422	0.798801	0.020343	0.9865	-0.0267658	0.993375
CJJ81176_RS07065	Cj1474c	putative type II protein secretion system D protein	0.404748	0.679589	0.0405294	0.9627	-1.02742	0.175172	-1.09768	0.130695
CJJ81176_RS07070	Cj1475c	hypothetical protein Cj1475c	0.508125	0.562149	-2.47869	0.000120456	-2.64147	5.04058e-05	-2.99229	2.36078e-06
CJJ81176_RS07075	Cj1476c	pyruvate-flavodoxin oxidoreductase	-1.09223	0.00350547	-2.58877	3.12747e-15	-1.86924	3.96299e-08	-1.8966	2.23792e-08
CJJ81176_RS07080	Cj1477c	putative hydrolase	-0.330898	0.746821	-0.794067	0.274938	-1.04462	0.173393	-1.07863	0.15064
CJJ81176_RS07085	Cj1478c	outer membrane fibronectin-binding protein	-0.734195	0.0690311	-0.967207	0.00646595	-0.549436	0.196186	-0.57254	0.168649
CJJ81176_RS07090	Cj1479c	30S ribosomal protein S9	1.77758	0.00331416	1.08478	0.0827622	0.634049	0.401391	0.664634	0.369674
CJJ81176_RS07095	Cj1480c	50S ribosomal protein L13	1.54093	0.000385569	1.58261	0.000125643	0.852059	0.0789963	1.00287	0.0314091
CJJ81176_RS07100	Cj1481c	putative helicase	1.25752	0.0710128	1.50943	0.00889759	1.46826	0.0169138	1.66468	0.00422838
CJJ81176_RS07105	Cj1482c	hypothetical protein Cj1482c	1.83498	0.002021	1.69462	0.00200287	1.12206	0.0770977	1.27268	0.0365044
CJJ81176_RS07110	Cj1483c	putative lipoprotein	-0.0290473	0.994794	0.243449	0.745398	0.262365	0.751397	0.452624	0.559542
CJJ81176_RS07115	Cj1484c	putative membrane protein	-0.224012	0.738402	-0.70673	0.111847	-0.950195	0.0351819	-1.05285	0.0155465
CJJ81176_RS07120	Cj1485c	putative periplasmic protein	-0.0165305	0.997681	-1.91558	0.000204775	-1.66796	0.00155445	-1.9471	0.000116054
CJJ81176_RS07125	Cj1486c	putative periplasmic protein	-0.623852	0.183177	-1.73999	2.38662e-06	-1.37565	0.000372522	-1.58114	2.16584e-05
CJJ81176_RS07130	Cj1487c	cb-type cytochrome C oxidase subunit III	-0.956792	0.0237295	-1.52376	4.27161e-05	-1.31666	0.000754467	-1.64798	1.05688e-05
CJJ81176_RS07135	Cj1488c	cb-type cytochrome C oxidase subunit IV	-1.96373	0.00678482	-1.39349	0.0504986	-1.13663	0.154568	-1.34436	0.0787829
CJJ81176_RS07140	Cj1489c	cb-type cytochrome C oxidase subunit II	-0.966905	0.00367403	-2.03146	4.19765e-12	-1.71428	1.00998e-08	-2.03427	3.85402e-12
CJJ81176_RS07145	Cj1490c	cb-type cytochrome C oxidase subunit I	-1.31269	1.13502e-05	-2.26438	3.1299e-16	-2.04756	2.64648e-13	-2.1423	1.55189e-14
CJJ81176_RS07150	Cj1491c	putative two-component regulator	0.794788	0.188374	0.592727	0.289697	0.420916	0.515732	0.400584	0.539341
CJJ81176_RS07155	Cj1492c	putative two-component sensor	0.389577	0.63768	0.541645	0.375011	0.696605	0.283712	0.7642	0.227029
CJJ81176_RS07160	Cj1493c	putative integral membrane protein	-0.161077	0.934562	-0.96209	0.326598	-0.617077	0.583698	-0.818049	0.461353
CJJ81176_RS07165	Cj1494c	carbamoyl-phosphate synthase small chain	0.743853	0.0840423	0.862449	0.0199216	0.561231	0.197935	0.646056	0.116881
CJJ81176_RS07170	Cj1495c	conserved hypothetical protein Cj1495c	0.994134	0.0812277	1.10711	0.0245235	1.1116	0.0329328	1.06545	0.0414871
CJJ81176_RS07175	Cj1496c	putative periplasmic protein	-0.562527	0.595709	-0.46793	0.55936	-0.196463	0.834107	0.0780062	0.941036
CJJ81176_RS07180	Cj1497c	hypothetical protein Cj1497c	0.0699233	0.978684	0.245318	0.792598	0.696472	0.435209	0.176244	0.874627
CJJ81176_RS07185	Cj1498c	adenylosuccinate synthetase	-0.125591	0.8983	-0.406308	0.478076	-0.363864	0.568417	-0.559503	0.363043
CJJ81176_RS07195	Cj1500	putative integral membrane protein	0.953007	0.135469	1.87618	0.00017817	0.664707	0.31036	0.827203	0.177619
CJJ81176_RS07200	Cj1501	conserved hypothetical protein Cj1501	-2.03258	0.00140614	-1.35506	0.0132998	-1.75459	0.00152861	-2.31959	1.10736e-05
CJJ81176_RS07205	Cj1502c	putative sodium/proline symporter	-3.48364	2.68729e-30	-2.99435	2.19563e-26	-2.44422	4.94187e-18	-2.39052	1.96195e-17
CJJ81176_RS07210	Cj1503c	putative proline dehydrogenase/delta-1-pyrroline-5-carboxylate dehydrogenase	-3.22185	5.06963e-20	-2.71973	2.24772e-16	-1.26657	0.000537557	-1.27935	0.000412288
CJJ81176_RS07215	Cj1504c	putative selenide,water dikinase	-0.603283	0.324074	-0.95042	0.0527066	-1.61251	0.000769177	-1.55628	0.000910163
CJJ81176_RS07220	Cj1505c	putative two-component response regulator (SirA-like protein)	-0.763095	0.163075	0.0101334	0.986242	-0.222558	0.701463	-0.179004	0.769431
CJJ81176_RS07225	Cj1506c	putative MCP-type signal transduction protein	-0.472266	0.476067	-0.891603	0.0893329	0.0592358	0.939913	0.00613668	1
CJJ81176_RS07230	Cj1507c	putative regulatory protein	-0.424205	0.528413	-0.0076864	0.990385	0.962633	0.0370513	0.87221	0.0652504
CJJ81176_RS07235	Cj1508c	FdhD protein	0.395615	0.414781	-0.693665	0.0759571	0.78512	0.0403516	0.633593	0.111044
CJJ81176_RS07240	Cj1509c	putative formate dehydrogenase, cytochrom B subunit	-1.77772	2.63777e-07	-3.12932	3.01702e-22	-2.70502	1.71824e-17	-2.85755	7.52472e-20
CJJ81176_RS07245	Cj1510c	putative formate dehydrogenase iron-sulfur subunit	-1.72339	0.000154963	-3.14661	3.68211e-14	-2.84144	8.97221e-12	-3.07139	6.58313e-14
CJJ81176_RS07250	Cj1511c	putative formate dehydrogenase large subunit (Selenocysteine containing)	-1.25825	0.00812546	-3.06355	1.19512e-13	-2.61208	5.72269e-10	-2.83965	9.36824e-12
CJJ81176_RS07255	n/a	formate dehydrogenase	-1.22132	0.0281413	-2.45037	2.97258e-07	-1.90037	0.000148432	-2.38438	6.8829e-07
CJJ81176_RS07260	Cj1513c	possible periplasmic protein	-1.58821	0.0812277	-1.35905	0.107688	-0.942395	0.334624	-1.32813	0.143436
CJJ81176_RS07265	Cj1514c	hypothetical protein Cj1514c	-2.12596	0.00721793	-0.692289	0.41882	-0.0814303	0.944862	-0.251492	0.827076
CJJ81176_RS07270	Cj1515c	putative decarboxylase	0.770786	0.133722	0.166467	0.765423	0.384971	0.48512	0.390169	0.47446
CJJ81176_RS07275	Cj1516	putative periplasmic oxidoreductase	-0.384363	0.477479	-0.205875	0.672976	0.129956	0.815569	0.0994561	0.874627
CJJ81176_RS07280	Cj1517	putative molybdopterin converting factor,subunit 1	0.498466	0.59463	1.07669	0.0891325	1.25666	0.0536337	1.21141	0.0657683
CJJ81176_RS07285	Cj1518	putative molybdopterin converting factor,subunit 2	-0.0345989	0.990539	0.825472	0.195035	0.844965	0.224662	0.82727	0.228791
CJJ81176_RS07290	Cj1519	putative molybdopterin biosynthesis protein	0.256527	0.746987	0.467929	0.414346	0.484756	0.444377	0.41275	0.525794
CJJ81176_RS07295	n/a	hypothetical protein	2.40875	0.00894338	2.79198	0.000695339	2.26932	0.0113891	1.92462	0.0375215
CJJ81176_RS07300	n/a	hypothetical protein	1.29242	0.113491	1.47561	0.0333446	1.37749	0.0650951	1.26333	0.0947439
CJJ81176_RS07305	Cj1529c	phosphoribosylformylglycinamidine cyclo-ligase	-0.07908	0.934022	0.477031	0.292493	0.486489	0.329877	0.524545	0.28177
CJJ81176_RS07310	Cj1530	putative dephospho-CoA kinase	0.219573	0.916472	1.25563	0.230276	1.63309	0.125334	1.56304	0.142188
CJJ81176_RS07315	Cj1531	diaminopimelate epimerase	0.70873	0.270354	0.694805	0.200404	1.04598	0.050929	0.940436	0.0837039
CJJ81176_RS07320	Cj1532	putative periplasmic protein	0.903808	0.309848	1.07672	0.141548	0.914886	0.264943	0.628009	0.470224
CJJ81176_RS07325	Cj1533c	putative helix-turn-helix containing protein	0.708882	0.256251	0.515707	0.361653	0.951539	0.0848966	1.05889	0.0486165
CJJ81176_RS07330	Cj1534c	putative bacterioferritin	-0.674492	0.294275	-0.0547287	0.942898	1.62892	0.00202618	1.66132	0.00154468
CJJ81176_RS07335	Cj1535c	putative glucose-6-phosphate isomerase	-0.77091	0.0759801	-0.581632	0.133518	-0.566171	0.179918	-0.715418	0.0711005
CJJ81176_RS07340	Cj1536c	UTP--glucose-1-phosphate uridylyltransferase	-1.08029	0.00441576	-1.28295	0.000168859	-0.3662	0.413899	-0.371332	0.403631
CJJ81176_RS07345	Cj1537c	acetyl-coenzyme A synthetase	-2.12763	0.00114313	-2.8445	3.09745e-06	-0.683887	0.407891	-0.896408	0.25096
CJJ81176_RS07350	Cj1538c	putative anion-uptake ABC-transport system ATP-binding protein	0.658016	0.614538	1.33325	0.133473	1.11132	0.264947	1.30499	0.168326
CJJ81176_RS07355	Cj1539c	putative anion-uptake ABC-transport system permease protein	0.833605	0.218442	-0.161229	0.825634	0.0882351	0.917095	0.118228	0.890775
CJJ81176_RS07360	Cj1540	putative periplasmic protein	-0.167956	0.813893	0.0110937	0.984384	0.644803	0.193824	0.642309	0.189932
CJJ81176_RS07365	Cj1541	conserved hypothetical protein Cj1541	-0.474253	0.4628	-1.74043	0.000189086	-1.18472	0.0193915	-0.923547	0.0777364
CJJ81176_RS07370	Cj1542	putative allophanate hydrolase subunit 1	-2.09144	0.00212319	-1.95974	0.000967621	-1.98068	0.00115114	-1.68369	0.00593491
CJJ81176_RS07375	Cj1543	putative allophanate hydrolase subunit 2	-1.22403	0.075618	-1.74642	0.00176206	-1.13424	0.062075	-1.33777	0.0209331
CJJ81176_RS07380	Cj1544c	putative integral membrane protein	-1.18748	0.0782656	-1.47103	0.00635493	-1.32776	0.0193915	-1.0248	0.0751551
CJJ81176_RS07385	Cj1545c	MdaB protein homolog	-0.853866	0.0854278	-1.57581	0.000108849	-0.7314	0.124316	-0.565614	0.251956
CJJ81176_RS07390	Cj1546	putative transcriptional regulator	0.358281	0.746821	-0.025275	0.977618	-0.353067	0.696781	0.269192	0.769526
CJJ81176_RS07395	Cj1547	Blc protein homolog	-0.148517	0.935769	0.339118	0.701886	0.775435	0.380391	0.218362	0.840637
CJJ81176_RS07400	Cj1548c	putative NADP-dependent alcohol dehydrogenase	0.0255443	0.990378	-1.55832	1.70332e-05	-0.985098	0.0143132	-0.767966	0.0692609
CJJ81176_RS07405	Cj1549c	putative type I restriction enzyme R protein	0.447965	0.338695	-0.547007	0.174095	-0.00925243	0.983373	-0.222322	0.645463
CJJ81176_RS07410	Cj1550c	putative ATP/GTP-binding protein	-0.430964	0.59002	-0.238068	0.71105	0.449508	0.490044	0.543849	0.393782
CJJ81176_RS07415	Cj1551c	putative type I restriction enzyme S protein	0.573671	0.616808	0.969607	0.225285	0.842937	0.344865	1.12767	0.171395
CJJ81176_RS07420	Cj1552c	conserved hypothetical protein Cj1552c	0.482839	0.555645	0.0107999	0.988942	0.73897	0.242088	0.767132	0.213489
CJJ81176_RS07425	Cj1553c	putative type I restriction enzyme M protein	0.0618458	0.94741	-1.52343	6.75594e-05	-0.949463	0.0246275	-0.891677	0.0342588
CJJ81176_RS07430	Cj1555c	hypothetical protein Cj1555c	0.126753	0.939037	-0.103865	0.917385	0.876779	0.30009	0.87198	0.299855
CJJ81176_RS07435	Cj1556	putative transcriptional regulator	-1.29257	0.283581	-0.587632	0.608254	0.350782	0.783028	0.212805	0.884989
CJJ81176_RS07440	n/a	membrane protein	0.605056	0.685491	-0.37371	0.765037	0.242765	0.861857	0.00987526	1
CJJ81176_RS07445	Cj1560	putative permease	0.110489	0.970802	0.778153	0.460232	0.419868	0.743592	1.20864	0.258053
CJJ81176_RS07455	Cj1563c	putative transcriptional regulator	0.929842	0.302927	1.06157	0.144676	1.44845	0.0444203	1.44036	0.0440622
CJJ81176_RS07465	Cj1565c	paralysed flagellum protein	-0.40656	0.613465	-0.184756	0.792598	-0.391228	0.570242	-0.380987	0.590061
CJJ81176_RS07470	Cj1566c	NADH dehydrogenase I chain N	-1.33681	0.0171089	-2.53739	2.12875e-07	-2.68808	4.42693e-08	-2.64651	5.76731e-08
CJJ81176_RS07475	Cj1567c	NADH dehydrogenase I chain M	-1.24059	0.000976852	-1.93736	1.09213e-08	-2.20565	7.87946e-11	-2.11301	3.42332e-10
CJJ81176_RS07480	Cj1568c	NADH dehydrogenase I chain L	-1.02342	0.0972769	-2.57736	3.63046e-07	-2.98757	3.10763e-09	-2.8565	1.44842e-08
CJJ81176_RS07485	Cj1569c	NADH dehydrogenase I chain K	-0.775781	0.3386	-2.65897	1.86923e-05	-2.89528	3.96846e-06	-2.94533	1.98168e-06
CJJ81176_RS07490	Cj1570c	NADH dehydrogenase I chain J	-1.63259	8.87099e-05	-1.62978	1.43022e-05	-1.50451	9.54117e-05	-1.56636	3.22113e-05
CJJ81176_RS07495	Cj1571c	NADH dehydrogenase I chain I	-1.05238	0.00381514	-2.06281	9.47436e-11	-1.99857	5.26325e-10	-1.92045	1.58043e-09
CJJ81176_RS07500	Cj1572c	NADH dehydrogenase I chain H	-1.31888	2.20571e-06	-2.09849	1.16119e-16	-2.48672	1.76302e-22	-2.35467	3.81206e-21
CJJ81176_RS07505	Cj1573c	putative NADH dehydrogenase I chain G	-1.01618	0.000203112	-1.92667	5.04304e-15	-1.96022	2.07935e-15	-1.75161	1.15421e-12
CJJ81176_RS07510	Cj1574c	hypothetical protein Cj1574c	-1.10395	0.0280027	-0.969926	0.0258595	-0.639799	0.204144	-0.769987	0.102557
CJJ81176_RS07515	Cj1575c	hypothetical protein Cj1575c	-0.636805	0.514594	-0.715798	0.365253	-0.277895	0.766824	-0.678446	0.440597
CJJ81176_RS07520	Cj1576c	NADH dehydrogenase I chain D	-0.59041	0.275138	-2.13168	2.27653e-07	-2.05455	9.19944e-07	-2.03458	1.09331e-06
CJJ81176_RS07525	Cj1577c	NADH dehydrogenase I chain C	-0.908145	0.0716744	-1.20412	0.00613528	-0.858908	0.0828179	-0.972959	0.0433694
CJJ81176_RS07530	Cj1578c	NADH dehydrogenase I chain B	-0.533003	0.358166	-2.03166	3.09745e-06	-2.02	4.90025e-06	-2.08012	1.98168e-06
CJJ81176_RS07535	Cj1579c	NADH dehydrogenase I chain A	-0.956607	0.04121	-0.91166	0.0268332	-0.891431	0.0414726	-0.897887	0.0379194
CJJ81176_RS07540	Cj1580c	putative peptide ABC-transport system ATP-binding protein	1.82092	0.110262	1.18701	0.293883	0.328828	0.815949	0.716475	0.596636
CJJ81176_RS07545	Cj1581c	putative peptide ABC-transport system ATP-binding protein	-0.580301	0.708671	0.404987	0.748327	-1.40966	0.248745	-0.345206	0.821347
CJJ81176_RS07550	Cj1582c	putative peptide ABC-transport system permease protein	1.19406	0.320812	-0.85113	0.45894	-1.69855	0.143668	-1.29034	0.28051
CJJ81176_RS07555	Cj1583c	putative peptide ABC-transport system permease protein	-0.0129414	1	-0.532543	0.516312	-1.60962	0.0429487	-0.918162	0.272204
CJJ81176_RS07560	Cj1584c	putative peptide ABC-transport system periplasmic peptide-binding protein	-0.537147	0.471816	0.958456	0.0601495	0.249292	0.714205	0.37724	0.55996
CJJ81176_RS07570	n/a	dimethyl sulfoxide reductase subunit B	-1.51652	0.199685	-1.2898	0.242566	-1.30156	0.280886	-1.40609	0.235785
CJJ81176_RS07575	n/a	hypothetical protein	0.0886444	0.980441	-0.0887851	0.948554	-0.278384	0.838007	-0.0891803	0.958005
CJJ81176_RS07580	n/a	chaperone	0	1	0.536793	0.562787	0.337363	NA	0.129527	0.922335
CJJ81176_RS07585	Cj1586	single domain haemoglobin	-0.96916	0.432064	-0.142546	0.905826	0.659467	0.544636	0.873967	0.40776
CJJ81176_RS07590	Cj1587c	putative ABC transporter	0.111141	0.935769	1.79646	0.000189614	2.67084	4.27967e-09	2.58292	1.22851e-08
CJJ81176_RS07595	Cj1588c	putative MFS (Major Facilitator Superfamily) transport protein	-1.1817	0.160116	-0.190187	0.810737	-0.0782364	0.936224	0.302116	0.702297
CJJ81176_RS07600	Cj1589	conserved hypothetical protein Cj1189	0.144784	0.906501	0.253108	0.724677	-0.0924583	0.918675	0.0276562	0.980523
CJJ81176_RS07605	Cj1590	translation initiation factor IF-1	1.58116	0.0167687	2.14058	0.000137629	1.16525	0.0819641	1.05956	0.115668
CJJ81176_RS07610	Cj1591	50S ribosomal protein L36	2.46626	1.07095e-08	1.45901	0.00109178	0.141568	0.829658	-0.0599826	0.936491
CJJ81176_RS07615	Cj1592	30S ribosomal protein S13	2.25515	2.21938e-06	2.09182	7.99389e-06	0.936352	0.0964266	0.706423	0.23694
CJJ81176_RS07620	Cj1593	30S ribosomal protein S11	2.56774	1.68007e-06	1.10575	0.0601367	0.299085	0.697122	-0.0253604	0.981589
CJJ81176_RS07625	Cj1594	30S ribosomal protein S4	2.52721	6.29467e-10	1.35016	0.00151433	0.681111	0.189343	0.53676	0.31778
CJJ81176_RS07630	Cj1595	DNA-directed RNA polymerase alpha chain	2.22404	5.37631e-14	1.48862	4.50682e-07	0.775599	0.0230511	0.822751	0.0137342
CJJ81176_RS07635	Cj1596	50S ribosomal protein L17	1.78975	8.76325e-06	1.24312	0.0022089	0.890351	0.0516856	1.04285	0.0173117
CJJ81176_RS07640	Cj1597	ATP phosphoribosyltransferase	0.571782	0.125081	0.62688	0.0506512	0.800869	0.0133666	1.00384	0.000909366
CJJ81176_RS07645	Cj1598	histidinol dehydrogenase	0.172151	0.745369	-0.400046	0.282473	0.080835	0.870974	0.0496091	0.928191
CJJ81176_RS07650	Cj1599	imidazoleglycerol-phosphate dehydratase/histidinol-phosphatase	0.589948	0.163075	-0.15952	0.714984	-0.084245	0.874111	0.106613	0.840637
CJJ81176_RS07655	Cj1600	imidazole glycerol phosphate synthase subunit	1.69759	0.000388056	0.226284	0.70456	0.336959	0.587873	0.806621	0.132089
CJJ81176_RS07660	Cj1601	phosphoribosylformimino-5-aminoimidazole carboxamide ribotide isomerase	0.862263	0.0520527	-0.568899	0.199185	-0.222022	0.67245	-0.134802	0.817403
CJJ81176_RS07665	Cj1602	conserved hypothetical protein Cj1602	0.527864	0.542287	1.11054	0.0568587	1.04743	0.0957006	1.20778	0.0442266
CJJ81176_RS07670	Cj1603	imidazole glycerol phosphate synthase subunit	0.557636	0.564644	0.990716	0.169532	1.05216	0.175901	1.22099	0.0990145
CJJ81176_RS07675	Cj1604	phosphoribosyl-AMP cyclohydrolase/ phosphoribosyl-ATP pyrophosphohydrolase	-0.00688968	1	0.32719	0.592233	0.310259	0.638576	0.704158	0.228898
CJJ81176_RS07680	Cj1605c	putative 2,3,4,5-tetrahydropyridine-2-carboxylate N-succinyltransferase	0.674154	0.164819	0.238395	0.631979	0.287535	0.587393	-0.0756682	0.90965
CJJ81176_RS07685	Cj1606c	putative ATP/GTP-binding protein (Mrp protein homolog)	0.351797	0.476067	0.198471	0.648834	0.50462	0.238027	0.276814	0.555509
CJJ81176_RS07690	Cj1607	2-C-methyl-D-erythritol 4-phosphate cytidylyltransferase/ 2-C-methyl-D-erythritol 2,4-cyclodiphosphate synthase	-1.87486	7.63332e-10	-1.29931	7.24005e-07	-0.976235	0.000392364	-0.983383	0.000255513
CJJ81176_RS07695	Cj1608	putative two-component regulator	-1.30801	0.00480609	-1.15452	0.00239338	-0.162095	0.753486	-0.718173	0.0838379
CJJ81176_RS07700	Cj1609	putative sulfate adenylyltransferase	-2.09982	8.84838e-09	-1.53497	1.5311e-06	-1.12152	0.000844737	-0.928983	0.00670733
CJJ81176_RS07705	Cj1610	putative phosphatidylglycerophosphatase	-1.06292	0.108536	-0.794182	0.154545	-0.726525	0.237911	-0.60777	0.322776
CJJ81176_RS07710	Cj1611	30S ribosomal protein S20	1.30376	0.0260752	0.80563	0.173509	-0.421764	0.550139	-0.272379	0.720423
CJJ81176_RS07715	Cj1612	peptide chain release factor 1	2.29182	2.25589e-05	1.31328	0.0209739	0.0396592	0.96709	-0.0323182	0.975729
CJJ81176_RS07720	Cj1613c	putative pyridoxamine 5'-phosphate oxidase	1.29153	0.0325247	3.83103	1.69771e-17	4.86529	1.06286e-27	4.58003	8.84008e-25
CJJ81176_RS07725	Cj1614	haemin uptake system outer membrane receptor	-0.58177	0.585042	4.5085	2.67928e-12	5.06118	3.23988e-15	4.93637	1.6804e-14
CJJ81176_RS07730	Cj1615	putative haemin uptake system permease protein	-0.136288	0.941398	5.35309	7.20197e-20	5.28161	3.07072e-19	5.13123	2.87775e-18
CJJ81176_RS07735	Cj1616	putative haemin uptake system ATP-binding protein	0.0377322	0.994794	4.88844	5.25331e-14	4.44862	1.65466e-11	4.20936	2.14083e-10
CJJ81176_RS07740	Cj1617	putative haemin uptake system periplasmic haemin-binding protein	1.25199	0.146522	5.22119	1.69703e-18	5.8647	4.65698e-23	5.75533	2.60872e-22
CJJ81176_RS07745	Cj1618c	putative radical SAM domain protein	-0.102014	0.95776	0.199305	0.825571	0.207578	0.828528	0.49633	0.574192
CJJ81176_RS07750	Cj1619	alpha-ketoglutarate permease	-2.06291	1.16102e-07	-2.63269	4.68742e-13	-1.90236	4.03842e-07	-1.67268	1.05688e-05
CJJ81176_RS07755	Cj1620c	A/G-specific adenine glycosylase	1.02733	0.24349	2.29337	0.000318885	1.2587	0.0978372	1.25044	0.0968489
CJJ81176_RS07760	Cj1621	putative periplasmic protein	-0.12729	0.897802	-0.4592	0.410185	0.203036	0.759929	0.258156	0.694213
CJJ81176_RS07785	Cj1622	riboflavin-specific deaminase/reductase	-0.729799	0.439949	-0.0690293	0.938997	-1.07296	0.157692	-0.824032	0.27771
CJJ81176_RS07790	Cj1623	putative membrane protein	-0.15056	0.931422	-0.76055	0.370464	-1.34341	0.122738	-0.912589	0.307428
CJJ81176_RS07795	Cj1624c	L-serine dehydratase	-1.73245	9.62126e-10	-2.99625	3.78693e-29	-2.44417	8.95612e-20	-2.49536	8.26017e-21
CJJ81176_RS07800	Cj1625c	amino acid transporter	-1.8075	2.23202e-06	-2.20621	1.16561e-09	-1.6886	8.29562e-06	-1.61938	2.02532e-05
CJJ81176_RS07805	Cj1626c	putative periplasmic protein	-1.3217	0.103782	-0.606647	0.460832	-0.297651	0.760448	-0.237113	0.827256
CJJ81176_RS07810	Cj1627c	hypothetical protein Cj1627c	0.0320483	0.990378	0.934424	0.051607	1.11911	0.0226011	1.2476	0.00788783
CJJ81176_RS07815	Cj1628	putative exbB/tolQ family transport protein	0.339908	0.734974	3.38895	3.17249e-14	3.44931	1.22368e-14	3.71999	3.55807e-17
CJJ81176_RS07820	Cj1629	putative exbD/tolR family transport protein	0.941632	0.406187	3.00938	2.53783e-05	2.59552	0.000605794	2.6473	0.000352785
CJJ81176_RS07825	Cj1630	putative TonB transport protein	2.27028	0.00357904	3.48581	1.31455e-07	3.14257	3.99201e-06	3.20407	1.98168e-06
CJJ81176_RS07830	Cj1631c	conserved hypothetical protein Cj1631c	0.371244	0.701211	0.367229	0.613723	1.23831	0.056853	1.33635	0.0365732
CJJ81176_RS07835	Cj1632c	putative periplasmic protein	-0.597418	0.689461	-0.799099	0.469538	-0.588824	0.63116	0.432936	0.737208
CJJ81176_RS07840	Cj1633	putative ATP-binding protein	0.521346	0.51546	1.01221	0.0776151	0.0928197	0.916099	0.315991	0.673154
CJJ81176_RS07845	Cj1634c	chorismate synthase	0.910291	0.0989764	-0.299427	0.606082	-0.588592	0.327126	-0.430474	0.479667
CJJ81176_RS07850	Cj1635c	ribonuclease III	-0.164282	0.894308	-0.821606	0.200226	-0.530685	0.471399	-0.699831	0.311966
CJJ81176_RS07855	Cj1636c	ribonuclease HI	-0.419783	0.746869	0.0466949	0.963103	-0.00156106	0.998334	-0.855223	0.363043
CJJ81176_RS07860	Cj1637c	putative periplasmic protein	0.963433	0.280497	1.45114	0.0457588	0.975111	0.251185	1.12397	0.168326
CJJ81176_RS07865	Cj1638	DNA primase	0.41724	0.692924	0.224542	0.803625	-0.194052	0.840027	-0.100113	0.928191
CJJ81176_RS07870	Cj1639	NifU protein homolog	-0.888308	0.188749	-0.841779	0.159885	-0.623329	0.36241	-0.251985	0.744563
CJJ81176_RS07875	Cj1640	hypothetical protein Cj1640	0.310028	0.78919	0.309559	0.713517	-0.12182	0.910475	-0.33494	0.724757
CJJ81176_RS07880	Cj1641	UDP-N-acetylmuramoylalanyl-D-glutamate--2, 6-diaminopimelate ligase	0.167223	0.860882	0.0641887	0.931183	-0.302529	0.657223	-0.229467	0.752952
CJJ81176_RS07885	Cj1642	conserved hypothetical protein Cj1642	-0.322666	0.724672	0.15335	0.828323	-0.195913	0.795004	-0.417287	0.555905
CJJ81176_RS07890	Cj1643	putative periplasmic protein	0.0376828	0.967354	-0.358031	0.283679	-0.61547	0.0630863	-0.766919	0.0137514
CJJ81176_RS07895	Cj1644	geranyltranstransferase	0.0633683	0.95776	0.272239	0.59345	-0.619463	0.238201	-0.254223	0.659851
CJJ81176_RS07900	Cj1645	transketolase	0.579493	0.249156	0.238419	0.633615	-0.106829	0.861627	-0.0500718	0.941036
CJJ81176_RS07905	Cj1646	putative ABC transport system permease	0.526192	0.555645	0.694465	0.292375	-0.282881	0.740481	0.192712	0.831043
CJJ81176_RS07910	Cj1647	putative ABC transport system ATP-binding protein	0.470124	0.722372	1.26271	0.13557	0.705617	0.488746	0.942998	0.326692
CJJ81176_RS07915	Cj1648	putative ABC transport system periplasmic substrate-binding protein	1.00044	0.205862	1.25286	0.0538858	0.750121	0.337913	1.0929	0.120903
CJJ81176_RS07920	Cj1649	putative lipoprotein	1.49847	0.0827912	1.63895	0.024515	1.02887	0.238201	1.31597	0.0999947
CJJ81176_RS07925	Cj1650	hypothetical protein Cj1650	0.595522	0.43835	0.808591	0.188997	0.910794	0.164557	0.803632	0.227029
CJJ81176_RS07930	Cj1651c	methionine aminopeptidase	0.792417	0.264875	0.282926	0.682958	-0.485937	0.515252	-0.253275	0.754338
CJJ81176_RS07935	Cj1652c	glutamate racemase	-0.161922	0.893013	-0.524505	0.418788	-0.972917	0.142295	-0.74366	0.267358
CJJ81176_RS07940	Cj1653c	putative lipoprotein	0.185532	0.86102	-0.280911	0.682958	-1.37864	0.0285443	-1.39135	0.0222736
CJJ81176_RS07945	n/a	Na+/H+ antiporter NhaA 1	-1.42852	0.0119673	-0.972722	0.067412	-0.97748	0.0855441	-0.987582	0.0799398
CJJ81176_RS07950	n/a	Na+/H+ antiporter NhaA 2	-0.601254	0.31111	-0.579452	0.241897	-0.485614	0.383693	-0.401996	0.47446
CJJ81176_RS07955	Cj1656c	hypothetical protein Cj1656c	2.1964	1.09852e-10	0.860466	0.0206251	1.01116	0.00752578	1.5641	5.75762e-06
CJJ81176_RS07960	n/a	hypothetical protein	-0.340752	0.762618	-0.684999	0.383782	0.454387	0.604622	0.85333	0.292704
CJJ81176_RS07965	Cj1658	putative iron permease	0.240947	0.850909	1.14798	0.132325	1.51195	0.050929	1.62891	0.0326469
CJJ81176_RS07970	Cj1659	periplasmic protein p19	0.513142	0.451411	1.83124	0.000217238	2.7478	8.38358e-09	2.41042	6.81683e-07
CJJ81176_RS07975	Cj1660	putative integral membrane protein	0.234689	0.853968	1.22009	0.0853943	1.25125	0.0976262	1.37963	0.0643926
CJJ81176_RS07980	Cj1661	possible ABC transport system permease	0.163493	0.895993	0.927652	0.159035	1.15427	0.0886578	1.1591	0.0869177
CJJ81176_RS07985	Cj1662	putative integral membrane protein	0.293671	0.782101	1.46528	0.0192502	1.53462	0.0193915	1.6171	0.0117293
CJJ81176_RS07990	Cj1663	putative ABC transport system ATP-binding protein	0.636706	0.653975	0.771564	0.484023	0.855185	0.48512	0.872357	0.476166
CJJ81176_RS07995	Cj1664	putative periplasmic thiredoxin	1.23497	0.0569675	1.79798	0.00075011	1.84503	0.000754467	1.92243	0.000339298
CJJ81176_RS08000	Cj1665	putative lipoprotein thiredoxin	2.26987	0.000320692	2.06636	0.00062117	2.10146	0.000715935	2.2446	0.000204203
CJJ81176_RS08005	Cj1666c	putative periplasmic protein	1.4916	0.00286171	2.08428	1.57509e-06	1.5768	0.000733039	1.70432	0.000167754
CJJ81176_RS08010	Cj1667c	RepA protein homolog	-0.668753	0.566153	-0.0304506	0.980861	-0.83062	NA	-0.491989	0.696798
CJJ81176_RS08040	Cj1669c	putative ATP-dependent DNA ligase	0.310924	0.782101	0.759275	0.284983	-0.0419204	0.969858	-0.574033	0.498756
CJJ81176_RS08045	Cj1670c	putative periplasmic protein	-0.884041	0.0767584	-0.176125	0.718429	-0.538237	0.262787	-0.442643	0.364035
CJJ81176_RS08050	Cj1671c	hypothetical protein Cj1671c	-1.55718	0.115862	-0.528921	0.597222	-0.548608	0.614452	-0.630248	0.567314
CJJ81176_RS08055	Cj1672c	enolase	-1.03454	0.00788017	-1.506	1.86923e-05	-1.24141	0.000814165	-1.34891	0.000202408
CJJ81176_RS08060	Cj1673c	recA protein	-0.406951	0.365565	-0.276914	0.484179	-0.0358905	0.946702	-0.219259	0.633039
CJJ81176_RS08065	Cj1674	conserved hypothetical protein Cj1674	-1.03082	0.0335485	-1.12687	0.00685097	-0.981589	0.0288727	-0.733409	0.115972
CJJ81176_RS08070	Cj1675	flagellar biosynthetic protein	-0.378582	0.670149	-0.401296	0.513244	0.157945	0.826062	0.473846	0.45347
CJJ81176_RS08075	Cj1676	UDP-N-acetylenolpyruvoylglucosamine reductase	-0.686587	0.490624	0.379885	0.618888	-0.00410867	0.996661	-0.405372	0.637342
CJJ81176_RS08080	Cj1680c	putative periplasmic protein	-1.18653	0.118038	-0.713525	0.239186	-0.576627	0.393923	-0.404514	0.556288
CJJ81176_RS08085	Cj1681c	CysQ protein homolog	-1.30441	0.0112371	-0.931479	0.0309834	-1.49714	0.000465843	-1.33073	0.00147365
CJJ81176_RS08090	Cj1682c	citrate synthase	-2.4177	1.3956e-06	-4.00095	1.69771e-17	-2.72234	2.18816e-08	-2.86213	2.95743e-09
CJJ81176_RS08095	Cj1684c	putative transmembrane transport protein	0.847673	0.314284	0.437212	0.584806	0.657619	0.436543	0.673038	0.420169
CJJ81176_RS08100	Cj1685c	putative biotin synthase	1.11855	0.0300809	0.0704417	0.915922	-0.243322	0.706737	-0.318305	0.612619
CJJ81176_RS08105	Cj1686c	DNA topoisomerase I	0.638687	0.181093	0.695857	0.0942071	0.623407	0.177023	0.488706	0.308845
CJJ81176_RS08110	Cj1687	putative efflux protein	0.233286	0.851254	-0.726433	0.340898	-0.135356	0.897135	-0.1634	0.874627
CJJ81176_RS08115	n/a	hydrolase	0.318432	0.759053	-0.756515	0.299312	-0.587108	0.483245	-0.399424	0.645182
CJJ81176_RS08125	n/a	transporter	0.0451786	0.983652	-1.93204	0.000593142	-1.53608	0.0107201	-1.561	0.0079518
CJJ81176_RS08130	Cj1688c	preprotein translocase subunit	1.94801	5.51537e-06	1.1839	0.00779756	-0.137023	0.829658	-0.151377	0.827076
CJJ81176_RS08135	Cj1689c	50S ribosomal protein L15	2.40972	1.03841e-08	1.24176	0.00518537	0.400794	0.489306	0.253704	0.68456
CJJ81176_RS08140	Cj1690c	30S ribosomal protein S5	1.83841	0.000163743	1.38639	0.00448868	0.61581	0.313277	0.339319	0.610476
CJJ81176_RS08145	Cj1691c	50S ribosomal protein L18	1.91693	0.000287164	1.70435	0.000974602	0.97061	0.10798	0.499568	0.467543
CJJ81176_RS08150	Cj1692c	50S ribosomal protein L6	2.27929	1.88812e-05	1.9985	0.000153775	1.29063	0.0301536	0.845087	0.192728
CJJ81176_RS08155	Cj1693c	30S ribosomal protein S8	1.77564	9.64684e-05	2.01836	2.85499e-06	1.43344	0.00208739	1.20087	0.0130569
CJJ81176_RS08160	Cj1694c	30S ribosomal protein S14	2.76768	1.12971e-07	1.63396	0.0025444	1.04051	0.0957006	0.692419	0.310973
CJJ81176_RS08165	Cj1695c	50S ribosomal protein L5	2.75299	4.23297e-09	1.78701	0.000197486	1.01358	0.0685589	0.710523	0.236475
CJJ81176_RS08170	Cj1696c	50S ribosomal protein L24	2.66674	1.57e-06	2.21144	6.23418e-05	1.52774	0.0127829	1.30927	0.0382391
CJJ81176_RS08175	Cj1697c	50S ribosomal protein L14	2.81988	5.93086e-09	1.33913	0.00972901	0.667612	0.293223	0.251011	0.730977
CJJ81176_RS08180	Cj1698c	30S ribosomal protein S17	2.39298	0.000559204	2.10835	0.00189183	1.57996	0.0358326	1.16072	0.149614
CJJ81176_RS08185	Cj1699c	50S ribosomal protein L29	3.34749	1.12971e-07	1.29866	0.0641663	0.845195	0.306441	0.567166	0.520734
CJJ81176_RS08190	Cj1700c	50S ribosomal protein L16	2.81544	1.38428e-07	1.77666	0.00128682	1.19617	0.054626	0.904266	0.171995
CJJ81176_RS08195	Cj1701c	30S ribosomal protein S3	2.60271	1.12971e-07	1.99894	5.20094e-05	1.2863	0.0206125	0.877741	0.143474
CJJ81176_RS08200	Cj1702c	50S ribosomal protein L22	3.16293	6.07324e-09	1.59354	0.00572513	0.857707	0.221441	0.296695	0.715494
CJJ81176_RS08205	Cj1703c	30S ribosomal protein S19	2.58681	1.12971e-07	1.65069	0.000987881	0.772582	0.214539	0.265606	0.713743
CJJ81176_RS08210	Cj1704c	50S ribosomal protein L2	3.15979	1.67126e-09	1.72428	0.00162624	0.842006	0.211026	0.458438	0.5361
CJJ81176_RS08215	Cj1705c	50S ribosomal protein L23	1.38068	0.0602181	2.37899	0.000145728	1.70901	0.0134604	1.26593	0.0860539
CJJ81176_RS08220	Cj1706c	50S ribosomal protein L4	2.51894	6.87339e-08	1.3622	0.00553993	0.424282	0.508248	0.0706218	0.932298
CJJ81176_RS08225	Cj1707c	50S ribosomal protein L3	2.89644	1.12335e-09	1.50072	0.00262637	0.380473	0.564925	0.29731	0.670519
CJJ81176_RS08230	Cj1708c	30S ribosomal protein S10	2.5906	4.45062e-11	2.11591	4.8684e-08	0.891766	0.054626	0.80528	0.0898997
CJJ81176_RS08235	Cj1709c	putative ribosomal pseudouridine synthase	2.59143	1.29003e-06	2.00395	0.00015631	1.62763	0.00429983	1.91252	0.000425827
CJJ81176_RS08240	Cj1710c	putative metallo-beta-lactamase family protein	2.31879	4.57233e-08	1.71456	6.06255e-05	0.93473	0.0602373	1.37135	0.00256724
CJJ81176_RS08245	Cj1711c	putative dimethyladenosine transferase (16S rRNA dimethylase)	0.64858	0.406187	1.44069	0.014749	0.464627	0.544636	0.799339	0.259763
CJJ81176_RS08250	Cj1712	hypothetical protein Cj1712	0.918364	0.371299	1.22791	0.130443	0.449692	0.65968	1.05347	0.236475
CJJ81176_RS08255	Cj1713	putative radical SAM domain protein	0.450222	0.616808	0.741079	0.233078	0.0967483	0.914408	0.179623	0.834439
CJJ81176_RS08260	Cj1714	small hydrophobic protein	0.5635	0.721948	1.14782	0.307322	0.709343	0.586389	0.943972	0.461353
CJJ81176_RS08275	n/a	LPS biosynthesis protein	0.33439	0.848001	0.184363	0.894227	-0.467044	NA	-1.00879	0.423631
CJJ81176_RS08290	Cj1715	putative acetyltransferase	0.264951	0.801704	0.705193	0.298035	0.386738	0.626762	0.493156	0.534806
CJJ81176_RS08295	Cj1716c	3-isopropylmalate dehydratase small subunit	-0.572904	0.646877	-1.17599	0.186536	-0.698988	0.494	-0.315796	0.780986
CJJ81176_RS08300	Cj1717c	3-isopropylmalate dehydratase large subunit	-0.0139025	0.999501	-1.35748	0.0370895	-1.12775	0.115534	-1.06362	0.139795
CJJ81176_RS08305	Cj1718c	3-isopropylmalate dehydrogenase	-0.117653	0.938296	-1.28319	0.068157	-0.91833	0.254789	-0.612402	0.473163
CJJ81176_RS08310	Cj1719c	2-isopropylmalate synthase	-0.192463	0.822681	-1.3633	0.00598766	-0.95169	0.0884493	-0.921485	0.0990145
CJJ81176_RS08315	Cj1720	hypothetical protein Cj1720	-0.970856	0.0392719	0.0496731	0.931183	-0.181191	0.743592	-0.139805	0.815557
CJJ81176_RS08320	Cj1721c	putative outer membrane protein	-0.06659	0.968966	-0.516719	0.404111	0.421559	0.532401	0.582634	0.363043
CJJ81176_RS08325	Cj1724c	putative GTP cyclohydrolase I	-0.806928	0.342633	-0.857552	0.216587	-0.0453012	0.964656	0.0548819	0.958708
CJJ81176_RS08330	Cj1725	putative periplasmic protein	0.898594	0.0862814	0.31532	0.56873	0.736148	0.178019	0.752262	0.163608
CJJ81176_RS08335	Cj1726c	homoserine O-succinyltransferase	-2.32633	5.73158e-05	-0.701576	0.230073	-0.408118	0.545929	-1.04253	0.0751551
CJJ81176_RS08340	Cj1727c	putative O-acetylhomoserine (thiol)-lyase	-2.24468	2.1553e-05	-0.8758	0.115827	-0.472413	0.480932	-0.654314	0.304045
CJJ81176_RS08345	Cj1728c	small hydrophobic protein	-0.637154	0.675809	-0.783655	0.499043	-1.46707	0.221481	-0.448904	0.747814
CJJ81176_RS08350	Cj1729c	flagellar hook subunit protein	-0.481188	0.249156	-0.987566	0.00362039	-0.787601	0.0345308	-0.877346	0.0155465
CJJ81176_RS08355	Cj1731c	crossover junction endodeoxyribonuclease	0.470741	0.693483	1.79352	0.0069049	0.640263	0.474388	1.41922	0.0534823
CJJ81176_RS08370	n/a	hypothetical protein	0	NA	0.389564	NA	0	NA	0	NA
CJJ81176_RS08375	n/a	hypothetical protein	NA	NA	NA	NA	NA	NA	NA	NA
CJJ81176_RS08380	n/a	spore coat protein CotS	NA	NA	NA	NA	NA	NA	NA	NA
CJJ81176_RS08385	n/a	hypothetical protein	NA	NA	NA	NA	NA	NA	NA	NA
CJJ81176_RS08390	n/a	hypothetical protein	NA	NA	NA	NA	NA	NA	NA	NA
CJJ81176_RS08395	n/a	hypothetical protein	NA	NA	NA	NA	NA	NA	NA	NA
CJJ81176_RS08400	n/a	hypothetical protein	NA	NA	NA	NA	NA	NA	NA	NA
CJJ81176_RS08405	n/a	hypothetical protein	0	1	0.881462	0.274016	0	NA	0	1
CJJ81176_RS08410	n/a	hypothetical protein	-0.542518	0.644308	0.156222	0.900191	-0.476098	NA	-0.76135	0.508798
CJJ81176_RS08415	n/a	helicase	-0.161534	0.906501	0.475805	0.56873	-0.154893	0.885608	-0.17301	0.874627
CJJ81176_RS08420	n/a	hypothetical protein	0	NA	0.206325	NA	0	NA	0	NA
CJJ81176_RS08425	n/a	spore coat protein CotH	0	NA	0.389564	NA	0	NA	0	NA
CJJ81176_RS08430	n/a	hypothetical protein	0	NA	0.206325	NA	0	NA	0	NA
CJJ81176_RS08435	n/a	hypothetical protein	0	NA	0.501852	NA	0	NA	0	NA
CJJ81176_RS08440	n/a	NTPase	0	NA	0.206325	NA	0	NA	0	NA
CJJ81176_RS08445	n/a	hypothetical protein	0	NA	0.206325	NA	0	NA	0	NA
CJJ81176_RS08450	n/a	hypothetical protein	0	NA	0.580266	NA	0	NA	0	NA
CJJ81176_RS08455	n/a	hypothetical protein	0	1	0.967702	0.199864	0.131834	0.902589	0.146144	0.894085
CJJ81176_RS08460	n/a	hypothetical protein	0	NA	0.206325	NA	0	NA	0	NA
CJJ81176_RS08465	n/a	hypothetical protein	NA	NA	NA	NA	NA	NA	NA	NA
CJJ81176_RS08470	n/a	hypothetical protein	NA	NA	NA	NA	NA	NA	NA	NA
CJJ81176_RS08475	n/a	hypothetical protein	0	NA	0.206325	NA	0	NA	0	NA
CJJ81176_RS08480	n/a	hypothetical protein	0	1	1.70919	0.0582078	0	NA	0	1
CJJ81176_RS08485	n/a	resolvase	0	NA	0.501852	NA	0	NA	0	NA
CJJ81176_RS08490	n/a	hypothetical protein	0	NA	0.501852	NA	0	NA	0	NA
CJJ81176_RS08495	n/a	hypothetical protein	0	NA	0.580266	NA	0	NA	0	NA
CJJ81176_RS08500	n/a	conjugal transfer protein TraC	0	1	0.881462	0.274016	0	NA	0	1
CJJ81176_RS08505	n/a	hypothetical protein	0	1	0.725796	0.341536	0	NA	0	1
CJJ81176_RS08510	n/a	antirepressor	NA	NA	NA	NA	NA	NA	NA	NA
CJJ81176_RS08515	n/a	hypothetical protein	0	NA	0.389564	NA	0	NA	0	NA
CJJ81176_RS08520	n/a	single-stranded DNA-binding protein	0	NA	0.206325	NA	0	NA	0	NA
CJJ81176_RS08525	n/a	hypothetical protein	NA	NA	NA	NA	NA	NA	NA	NA
CJJ81176_RS08530	n/a	type IV secretion system protein	0	NA	0.501852	NA	0	NA	0	NA
CJJ81176_RS08535	n/a	conjugal transfer protein TrbL	0	1	0.881462	0.274016	0	NA	0	1
CJJ81176_RS08540	n/a	hypothetical protein	NA	NA	NA	NA	NA	NA	NA	NA
CJJ81176_RS08545	n/a	conjugal transfer protein TraJ	NA	NA	NA	NA	NA	NA	NA	NA
CJJ81176_RS08550	n/a	hypothetical protein	0	NA	0.389564	NA	0	NA	0	NA
CJJ81176_RS08555	n/a	type IV secretion system protein VirB10	0	NA	0.501852	NA	0	NA	0	NA
CJJ81176_RS08560	n/a	hypothetical protein	0	NA	0.389564	NA	0	NA	0	NA
CJJ81176_RS08565	n/a	sodium:calcium antiporter	0	NA	0.501852	NA	0	NA	0	NA
CJJ81176_RS08570	n/a	cag pathogenicity island protein	0	NA	0.206325	NA	0	NA	0	NA
CJJ81176_RS08575	n/a	hypothetical protein	0	NA	0.501852	NA	0	NA	0	NA
CJJ81176_RS08580	n/a	hypothetical protein	0	NA	0.206325	NA	0	NA	0	NA
CJJ81176_RS08585	n/a	hypothetical protein	0	1	1.43987	0.100603	0	NA	0	1
CJJ81176_RS08590	n/a	DNA topoisomerase III	0	NA	0.389564	NA	0	NA	0	NA
CJJ81176_RS08595	n/a	hypothetical protein	NA	NA	NA	NA	NA	NA	NA	NA
CJJ81176_RS08600	n/a	hypothetical protein	NA	NA	NA	NA	NA	NA	NA	NA
CJJ81176_RS08605	n/a	tetracycline resistance ribosomal protection protein Tet(O)	-0.0436085	0.990378	0.75363	0.34403	-0.048941	0.967205	-0.0499388	0.970564
CJJ81176_RS08610	n/a	hypothetical protein	0	1	1.15551	0.177533	0	NA	0	1
CJJ81176_RS08615	n/a	hypothetical protein	NA	NA	NA	NA	NA	NA	NA	NA
CJJ81176_RS08620	n/a	hypothetical protein	NA	NA	NA	NA	NA	NA	NA	NA
CJJ81176_RS08625	n/a	hypothetical protein	NA	NA	NA	NA	NA	NA	NA	NA
CJJ81176_RS08630	n/a	hypothetical protein	NA	NA	NA	NA	NA	NA	NA	NA
CJJ81176_RS08635	n/a	hypothetical protein	NA	NA	NA	NA	NA	NA	NA	NA
CJJ81176_RS08640	n/a	conjugal transfer protein	NA	NA	NA	NA	NA	NA	NA	NA
CJJ81176_RS08645	n/a	hypothetical protein	NA	NA	NA	NA	NA	NA	NA	NA
CJJ81176_RS08650	n/a	hypothetical protein	NA	NA	NA	NA	NA	NA	NA	NA
CJJ81176_RS08655	n/a	hypothetical protein	NA	NA	NA	NA	NA	NA	NA	NA
CJJ81176_RS08660	n/a	hypothetical protein	NA	NA	NA	NA	NA	NA	NA	NA
CJJ81176_RS08665	n/a	hypothetical protein	NA	NA	NA	NA	NA	NA	NA	NA
CJJ81176_RS08670	n/a	DNA topoisomerase I	NA	NA	NA	NA	NA	NA	NA	NA
CJJ81176_RS08675	n/a	hypothetical protein	NA	NA	NA	NA	NA	NA	NA	NA
CJJ81176_RS08680	n/a	single-stranded DNA-binding protein	NA	NA	NA	NA	NA	NA	NA	NA
CJJ81176_RS08690	n/a	hypothetical protein	NA	NA	NA	NA	NA	NA	NA	NA
CJJ81176_RS08695	n/a	hypothetical protein	NA	NA	NA	NA	NA	NA	NA	NA
CJJ81176_RS08700	n/a	hypothetical protein	NA	NA	NA	NA	NA	NA	NA	NA
CJJ81176_RS08705	n/a	hypothetical protein	NA	NA	NA	NA	NA	NA	NA	NA
CJJ81176_RS08710	n/a	hypothetical protein	NA	NA	NA	NA	NA	NA	NA	NA
CJJ81176_RS08715	n/a	hypothetical protein	NA	NA	NA	NA	NA	NA	NA	NA
CJJ81176_RS08720	n/a	hypothetical protein	NA	NA	NA	NA	NA	NA	NA	NA
CJJ81176_RS08725	n/a	hypothetical protein	NA	NA	NA	NA	NA	NA	NA	NA
CJJ81176_RS08730	n/a	chromosome partitioning protein ParA	NA	NA	NA	NA	NA	NA	NA	NA
CJJ81176_RS08735	n/a	hypothetical protein	NA	NA	NA	NA	NA	NA	NA	NA
CJJ81176_RS08740	n/a	RepE replication protein	NA	NA	NA	NA	NA	NA	NA	NA
CJJ81176_RS08745	n/a	hypothetical protein	NA	NA	NA	NA	NA	NA	NA	NA
CJJ81176_RS08750	n/a	hypothetical protein	NA	NA	NA	NA	NA	NA	NA	NA
CJJ81176_RS08755	n/a	hypothetical protein	NA	NA	NA	NA	NA	NA	NA	NA
CJJ81176_RS08760	n/a	hypothetical protein	NA	NA	NA	NA	NA	NA	NA	NA
CJJ81176_RS08765	n/a	hypothetical protein	NA	NA	NA	NA	NA	NA	NA	NA
CJJ81176_RS08770	n/a	hypothetical protein	NA	NA	NA	NA	NA	NA	NA	NA
CJJ81176_RS08775	n/a	hypothetical protein	NA	NA	NA	NA	NA	NA	NA	NA
CJJ81176_RS08780	n/a	hypothetical protein	NA	NA	NA	NA	NA	NA	NA	NA
CJJ81176_RS08785	n/a	hypothetical protein	NA	NA	NA	NA	NA	NA	NA	NA
CJJ81176_RS08790	n/a	PTS mannitol transporter subunit IIABC	NA	NA	NA	NA	NA	NA	NA	NA
CJJ81176_RS08795	n/a	hypothetical protein	NA	NA	NA	NA	NA	NA	NA	NA
CJJ81176_RS08800	n/a	hypothetical protein	NA	NA	NA	NA	NA	NA	NA	NA
CJJ81176_RS08805	n/a	hypothetical protein	NA	NA	NA	NA	NA	NA	NA	NA
CJJ81176_RS08815	n/a	hypothetical protein	NA	NA	NA	NA	NA	NA	NA	NA
CJJ81176_RS08820	n/a	hypothetical protein	NA	NA	NA	NA	NA	NA	NA	NA
CJJ81176_RS08825	n/a	hypothetical protein	NA	NA	NA	NA	NA	NA	NA	NA
CJJ81176_RS08830	n/a	hypothetical protein	NA	NA	NA	NA	NA	NA	NA	NA
CJJ81176_RS08835	n/a	hypothetical protein	0	NA	0	NA	0.29861	NA	0	NA
CJJ81176_RS08840	n/a	relaxase	NA	NA	NA	NA	NA	NA	NA	NA
CJJ81176_RS08845	n/a	hypothetical protein	NA	NA	NA	NA	NA	NA	NA	NA
CJJ81176_RS08850	n/a	hypothetical protein	NA	NA	NA	NA	NA	NA	NA	NA
CJJ81176_RS08855	n/a	ATPase AAA	NA	NA	NA	NA	NA	NA	NA	NA
