# Supplementary material for: Campylobacter jejuni Demonstrates Conserved Proteomic and Transcriptomic Responses When Co-cultured With Human INT 407 and Caco-2 Epithelial Cells
Source: Front Microbiol. 2019 Apr 11;10:755. doi: 10.3389/fmicb.2019.00755 (PMC6470190; doi:10.3389/fmicb.2019.00755)
Supplement: Supplementary file 4 [file Table_4.XLSX]

## Sheet: Legend
Campylobacter jejuni demonstrates conserved proteomic and transcriptomic responses when co-cultured with human INT 407 and Caco-2 epithelial cells
Nicholas M. Negretti,1 Geremy Clair,2 Prabhat K. Talukdar,1 Christopher R. Gourley,1 Steven Huynh,3 Joshua N. Adkins,2 Craig T. Parker,3 and Colby M. Corneau, 1 Michael E. Konkel1*
1 School of Molecular Biosciences, College of Veterinary Medicine, Washington State University, Pullman, WA, USA, 99164-7520.
2 Integrative Omics, Pacific Northwest National Laboratory, 902 Battelle Boulevard, Richland, Washington 99352
3 Produce Safety and Microbiology, USDA Agricultural Research Service, 800 Buchanan St., Albany CA 94710
*To whom correspondence should be addressed: Dr. Michael E. Konkel, Biotechnology Life Sciences Building, Room 447, Washington State University, Pullman WA 99164, Telephone: 509-335-5039; Email: konkel@vetmed.wsu.edu
STable 4. Identification of shared gene expression (upregulated from 2.5 to 4 hr) and protein responses. Genes that were upregulated from 2.5 to 4 hr during C. jejuni co-culture with INT 407 and Caco-2 cells were identified and compared to the list of proteins detected in greater abundance when C. jejuni was co-cultured with the INT 407 and Caco-2 cells for 4 hr. The selection criteria for the ge…

## Sheet: Up both
Transcripts increase from 2.5 to 4 hr that also have increased protein abundance									COG enrichment
81-176 gene	Symbol	Annotation	COG category	INT RNA difference	Caco-2 RNA difference	INT protein FC	Caco-2 protein FC		COG	Count	p value	FDR	Odds ratio	COG category description
CJJ81176_RS00765	trxB	thioredoxin reductase	O	2.08411	1.26812	2.08411	1.26812		P	9	9.44575e-06	0.000255035	8.62596	Inorganic ion transport and metabolism
CJJ81176_RS00910	cfbpA	putative iron-uptake ABC transport system,periplasmic iron-binding protein	P	3.47535	0.443138	3.47535	0.443138		V	3	0.0215667	0.291151	5.71024	Defense mechanisms
CJJ81176_RS01165	iscS	cysteine desulfurase (NifS protein homolog)	E	1.13011	0.773478	1.13011	0.773478		T	3	0.102228	0.92005	2.89342	Signal transduction mechanisms
CJJ81176_RS01400	peb3	major antigenic peptide PEB3	M	0.59515	0.257421	0.59515	0.257421		I	2	0.191991	1	2.64622	Lipid transport and metabolism
CJJ81176_RS01605	ahpC	alkyl hydroperoxide reductase	V	2.39558	1.70196	2.39558	1.70196		S	2	0.327647	1	1.7814	Function unknown
CJJ81176_RS01830	Cj0379c	putative molybdenum containing oxidoreductase	C	1.3834	0.816983	1.3834	0.816983		O	2	0.423872	1	1.43333	Posttranslational modification, protein turnover, chaperones
CJJ81176_RS02165	Cj0444	ligand-gated channel	P	3.24613	0.194085	3.24613	0.194085		K	1	0.603652	1	1.11105	Transcription
CJJ81176_RS03460	Cj0715	transthyretin-like periplasmic protein	F	2.69159	1.45004	2.69159	1.45004		F	1	0.610366	1	1.09024	Nucleotide transport and metabolism
CJJ81176_RS03470	Cj0717	putative ArsC family protein	P	1.98296	0.456706	1.98296	0.456706		U	1	0.64232	1	0.996668	Intracellular trafficking, secretion, and vesicular transport
CJJ81176_RS03935	glnH	putative glutamine binding periplasmic protein	ET	1.60362	0.77151	1.60362	0.77151		M	2	0.672321	1	0.87719	Cell wall/membrane/envelope biogenesis
CJJ81176_RS05745	cfa	cyclopropane-fatty-acyl-phospholipid synthase	I	2.19354	1.80289	2.19354	1.80289		N	1	0.69356	1	0.862381	Cell motility
CJJ81176_RS05775	cetB	bipartate energy taxis response protein cetB	KT	1.38114	0.434729	1.38114	0.434729		E	2	0.721535	1	0.794103	Amino acid transport and metabolism
CJJ81176_RS05780	cetA	bipartate energy taxis response protein cetA	NT	0.965501	0.476146	0.965501	0.476146		C	1	0.862657	1	0.504169	Energy production and conversion
CJJ81176_RS06665	Cj1383c	hypothetical protein Cj1383c	Uncategorized	3.96424	0.945761	3.96424	0.945761		Uncategorized	1	0.989378	1	0.210073	Uncategorized
CJJ81176_RS06670	Cj1384c	hypothetical protein Cj1384c	S	4.19136	0.94933	4.19136	0.94933		J	0	1	1	0	Translation, ribosomal structure and biogenesis
CJJ81176_RS06675	katA	catalase	P	5.01208	2.36891	5.01208	2.36891		A	0	1	1	0	RNA processing and modification
CJJ81176_RS07590	Cj1587c	putative ABC transporter	P	2.47178	0.874381	2.47178	0.874381		L	0	1	1	0	Replication, recombination and repair
CJJ81176_RS07720	Cj1613c	putative pyridoxamine 5'-phosphate oxidase	P	3.28851	1.03426	3.28851	1.03426		B	0	1	1	0	Chromatin structure and dynamics
CJJ81176_RS07725	chuA	haemin uptake system outer membrane receptor	P	5.51814	0.552678	5.51814	0.552678		D	0	1	1	0	Cell cycle control, cell division, chromosome partitioning
CJJ81176_RS07740	chuD	putative haemin uptake system periplasmic haemin-binding protein	P	4.50334	0.643513	4.50334	0.643513		Y	0	1	1	0	Nuclear structure
CJJ81176_RS07815	exbB2	putative exbB/tolQ family transport protein	U	3.38009	0.0603541	3.38009	0.0603541		Z	0	1	1	0	Cytoskeleton
CJJ81176_RS07965	Cj1658	putative iron permease	P	1.38797	0.363973	1.38797	0.363973		W	0	1	1	0	Extracellular structures
CJJ81176_RS07970	p19	periplasmic protein p19	MI	1.89728	0.916561	1.89728	0.916561		X	0	1	1	0	Mobilome: prophages, transposons
CJJ81176_RS07975	Cj1660	putative integral membrane protein	S	1.14494	0.0311557	1.14494	0.0311557		G	0	1	1	0	Carbohydrate transport and metabolism
CJJ81176_RS07980	Cj1661	possible ABC transport system permease	V	0.995608	0.226614	0.995608	0.226614		H	0	1	1	0	Coenzyme transport and metabolism
CJJ81176_RS07985	Cj1662	putative integral membrane protein	V	1.32343	0.069339	1.32343	0.069339		Q	0	1	1	0	Secondary metabolites biosynthesis, transport and catabolism
CJJ81176_RS07995	Cj1664	putative periplasmic thiredoxin	O	0.687465	0.04705	0.687465	0.04705		R	0	1	1	0	General function prediction only

## Sheet: Down both
Transcripts decrease from 2.5 to 4 hr that also have decreased protein abundance									COG enrichment
81-176 gene	Symbol	Annotation	COG category	INT RNA difference	Caco-2 RNA difference	INT protein FC	Caco-2 protein FC		COG	Count	p value	FDR	Odds ratio	COG category description
CJJ81176_RS02130	sdhA	succinate dehydrogenase flavoprotein subunit	C	-2.43016	-0.597595	-2.43016	-0.597595		C	5	1.57608e-05	0.000425542	39.4057	Energy production and conversion
CJJ81176_RS02135	sdhB	putative succinate dehydrogenase iron-sulfur protein	C	-2.73193	-0.556568	-2.73193	-0.556568		P	1	0.295901	1	3.26934	Inorganic ion transport and metabolism
CJJ81176_RS03765	napG	putative ferredoxin	CJ	-3.61644	-0.262563	-3.61644	-0.262563		J	1	0.484548	1	1.68482	Translation, ribosomal structure and biogenesis
CJJ81176_RS03775	napB	periplasmic nitrate reductase small subunit (cytochrome C-type protein)	CP	-2.26292	-0.0147482	-2.26292	-0.0147482		A	0	1	1	0	RNA processing and modification
CJJ81176_RS06545	nrfH	putative periplasmic cytochrome C	C	-2.86298	-0.138533	-2.86298	-0.138533		K	0	1	1	0	Transcription
									L	0	1	1	0	Replication, recombination and repair
									B	0	1	1	0	Chromatin structure and dynamics
									D	0	1	1	0	Cell cycle control, cell division, chromosome partitioning
									Y	0	1	1	0	Nuclear structure
									V	0	1	1	0	Defense mechanisms
									T	0	1	1	0	Signal transduction mechanisms
									M	0	1	1	0	Cell wall/membrane/envelope biogenesis
									N	0	1	1	0	Cell motility
									Z	0	1	1	0	Cytoskeleton
									W	0	1	1	0	Extracellular structures
									U	0	1	1	0	Intracellular trafficking, secretion, and vesicular transport
									O	0	1	1	0	Posttranslational modification, protein turnover, chaperones
									X	0	1	1	0	Mobilome: prophages, transposons
									G	0	1	1	0	Carbohydrate transport and metabolism
									E	0	1	1	0	Amino acid transport and metabolism
									F	0	1	1	0	Nucleotide transport and metabolism
									H	0	1	1	0	Coenzyme transport and metabolism
									I	0	1	1	0	Lipid transport and metabolism
									Q	0	1	1	0	Secondary metabolites biosynthesis, transport and catabolism
									R	0	1	1	0	General function prediction only
									S	0	1	1	0	Function unknown
									Uncategorized	0	1	1	0	Uncategorized
