# Supplementary material for: Campylobacter jejuni Demonstrates Conserved Proteomic and Transcriptomic Responses When Co-cultured With Human INT 407 and Caco-2 Epithelial Cells
Source: Front Microbiol. 2019 Apr 11;10:755. doi: 10.3389/fmicb.2019.00755 (PMC6470190; doi:10.3389/fmicb.2019.00755)
Supplement: Supplementary file 5 [file Table_5.XLSX]

## Sheet: Legend
Campylobacter jejuni demonstrates conserved proteomic and transcriptomic responses when co-cultured with human INT 407 and Caco-2 epithelial cells
Nicholas M. Negretti,1 Geremy Clair,2 Prabhat K. Talukdar,1 Christopher R. Gourley,1 Steven Huynh,3 Joshua N. Adkins,2 Craig T. Parker,3 and Colby M. Corneau, 1 Michael E. Konkel1*
1 School of Molecular Biosciences, College of Veterinary Medicine, Washington State University, Pullman, WA, USA, 99164-7520.
2 Integrative Omics, Pacific Northwest National Laboratory, 902 Battelle Boulevard, Richland, Washington 99352
3 Produce Safety and Microbiology, USDA Agricultural Research Service, 800 Buchanan St., Albany CA 94710
*To whom correspondence should be addressed: Dr. Michael E. Konkel, Biotechnology Life Sciences Building, Room 447, Washington State University, Pullman WA 99164, Telephone: 509-335-5039; Email: konkel@vetmed.wsu.edu
STable 5. Provided is a complete list of genes whose expression increases from 2.5 to 4 hr upon C. jejuni co-culture with INT 407 and Caco-2 cells. The genes reported increased in abundance from 2.4 to 4 hr in both INT 407 and Caco2 cells, and were significantly upregulated (Benjamini-Hochberg adjusted p value of less than 0.1 (q < 0.1) as determined by a Wald test implemented in DESeq2) at the 4…

## Sheet: Up both
Transcripts that increase from 2.5 hr to 4 hr				RNA-Seq data			COG enrichment
81-176 gene	Symbol	Annotation	COG category	Difference in INT 407	Difference in Caco-2		COG	Count	p value	FDR	Odds ratio	COG category description
CJJ81176_RS00105	Cj0021c	putative fumarylacetoacetate (FAA) hydrolase family protein	Q	0.0863594	0.627953		P	23	1.81291e-06	4.89485e-05	3.82688	Inorganic ion transport and metabolism
CJJ81176_RS00115	purB	adenylosuccinate lyase	F	0.375467	0.00871771		E	21	0.0190489	0.25716	1.77966	Amino acid transport and metabolism
CJJ81176_RS00195		gamma-glutamyltranspeptidase	E	0.768187	2.3599		V	7	0.0365858	0.329272	2.51106	Defense mechanisms
CJJ81176_RS00210		transglycosylase	M	1.02586	0.0708295		S	9	0.159881	1	1.5492	Function unknown
CJJ81176_RS00360	flhF	flagellar biosynthesis protein	N	0.0981498	0.168985		T	8	0.248202	1	1.39326	Signal transduction mechanisms
CJJ81176_RS00380	pspA	protease	O	1.12759	0.235373		C	12	0.311934	1	1.21942	Energy production and conversion
CJJ81176_RS00530	birA	putative biotin--[acetyl-CoA-carboxylase] synthetase	H	1.14194	0.042812		O	9	0.345561	1	1.21964	Posttranslational modification, protein turnover, chaperones
CJJ81176_RS00750	Cj0143c	putative periplasmic solute binding protein for ABC transport system	P	1.25448	0.0908088		I	5	0.423507	1	1.20097	Lipid transport and metabolism
CJJ81176_RS00765	trxB	thioredoxin reductase	O	2.08411	1.26812		K	5	0.527833	1	1.05315	Transcription
CJJ81176_RS00770	trxA	thioredoxin	O	1.64469	0.916479		Q	2	0.554661	1	1.11204	Secondary metabolites biosynthesis, transport and catabolism
CJJ81176_RS00850	Cj0163c	hypothetical protein Cj0163c	Uncategorized	1.68409	0.444216		H	8	0.584607	1	0.973456	Coenzyme transport and metabolism
CJJ81176_RS00860	miaA	tRNA delta(2)-isopentenylpyrophosphate transferase	J	0.861722	0.254394		F	4	0.731043	1	0.805147	Nucleotide transport and metabolism
CJJ81176_RS00880	sodB	superoxide dismutase (Fe)	P	1.29356	1.11595		R	9	0.754869	1	0.823958	General function prediction only
CJJ81176_RS00910	cfbpA	putative iron-uptake ABC transport system,periplasmic iron-binding protein	P	3.47535	0.443138		G	4	0.801604	1	0.719264	Carbohydrate transport and metabolism
CJJ81176_RS00915	Cj0176c	putative lipoprotein	Uncategorized	0.611079	0.919578		N	4	0.871719	1	0.629061	Cell motility
CJJ81176_RS01030	Cj0204	putative oligopeptide transporter, OPT family	S	1.3009	1.33142		Uncategorized	18	0.883093	1	0.760124	Uncategorized
CJJ81176_RS01110	Cj0229	putative acetyltransferase	R	0.124397	0.646689		M	7	0.964192	1	0.545509	Cell wall/membrane/envelope biogenesis
CJJ81176_RS01165	iscS	cysteine desulfurase (NifS protein homolog)	E	1.13011	0.773478		U	2	0.974596	1	0.349852	Intracellular trafficking, secretion, and vesicular transport
CJJ81176_RS01285	Cj0265c	putative cytochrome C-type haem-binding periplasmic protein	C	0.0847418	0.652979		L	1	0.998815	1	0.141533	Replication, recombination and repair
CJJ81176_RS01395	lpxB	lipid-A-disaccharide synthase	M	0.645881	0.413676		J	5	0.99954	1	0.29721	Translation, ribosomal structure and biogenesis
CJJ81176_RS01400	peb3	major antigenic peptide PEB3	M	0.59515	0.257421		A	0	1	1	0	RNA processing and modification
CJJ81176_RS01445	Cj0302c	putative molybdenum-pterin binding protein	H	1.7051	0.773347		B	0	1	1	0	Chromatin structure and dynamics
CJJ81176_RS01450	modA	putative molybdate-binding lipoprotein	P	2.41348	1.35424		D	0	1	1	0	Cell cycle control, cell division, chromosome partitioning
CJJ81176_RS01485	Cj0310c	putative efflux protein	V	1.25263	0.572148		Y	0	1	1	0	Nuclear structure
CJJ81176_RS01545	perR	peroxide stress regulator	P	2.1143	0.909431		Z	0	1	1	0	Cytoskeleton
CJJ81176_RS01605	ahpC	alkyl hydroperoxide reductase	V	2.39558	1.70196		W	0	1	1	0	Extracellular structures
CJJ81176_RS01670	trpF	N-(5'-phosphoribosyl)anthranilate isomerase	E	1.2787	0.479811		X	0	1	1	0	Mobilome: prophages, transposons
CJJ81176_RS01680	trpA	tryptophan synthase alpha chain	E	0.216581	1.4992
CJJ81176_RS01685	Cj0350	hypothetical protein Cj0350	Uncategorized	1.31958	1.08088
CJJ81176_RS01800	Cj0373	putative D-2-hydroxyacid dehydrogenase	CHR	0.190035	0.320124
CJJ81176_RS01830	Cj0379c	putative molybdenum containing oxidoreductase	C	1.3834	0.816983
CJJ81176_RS01895	mqo	putative malate:quinone oxidoreductase	G	0.680178	0.526252
CJJ81176_RS01975	frdC	fumarate reductase cytochrome B subunit	Uncategorized	0.0739216	0.628002
CJJ81176_RS02145	Cj0440c	putative transcriptional regulator	H	1.41318	0.710801
CJJ81176_RS02165	Cj0444	ligand-gated channel	P	3.24613	0.194085
CJJ81176_RS02175	Cj0448c	putative MCP-type signal transduction protein	NT	0.188645	0.855659
CJJ81176_RS02180	Cj0449c	conserved hypothetical protein Cj0449c	S	0.951293	0.996285
CJJ81176_RS02260	ctb	group III truncated haemoglobin	P	1.70895	0.8802
CJJ81176_RS02485	Cj0511	putative secreted protease	O	0.850575	0.273287
CJJ81176_RS02610	Cj0539	hypothetical protein Cj0539	Uncategorized	1.46194	0.501745
CJJ81176_RS02680	Cj0553	putative integral membrane protein	S	2.5633	2.14152
CJJ81176_RS02685	Cj0554	hypothetical protein Cj0554	Uncategorized	2.55863	1.6454
CJJ81176_RS02710	Cj0559	putative pyridine nucleotide-disulphide oxidoreductase	O	1.10104	1.01597
CJJ81176_RS02830	Cj0581	putative NUDIX hydrolase family protein	V	1.09113	0.384491
CJJ81176_RS03115	aspS	aspartyl-tRNA synthetase	J	0.361542	0.13855
CJJ81176_RS03180	Cj0653c	putative aminopeptidase	E	1.30598	0.70596
CJJ81176_RS03220	hslV	ATP-dependent protease HslV	O	0.0450888	0.55183
CJJ81176_RS03295	Cj0682	hypothetical protein Cj0682	Uncategorized	1.73228	0.0857454
CJJ81176_RS03315	ispG	4-hydroxy-3-methylbut-2-en-1-yl diphosphate synthase	I	0.141037	0.370355
CJJ81176_RS03325	pta	putative phosphate acetyltransferase	C	0.73396	1.30425
CJJ81176_RS03330	ackA	acetate kinase	C	0.550482	0.998795
CJJ81176_RS03460	Cj0715	transthyretin-like periplasmic protein	F	2.69159	1.45004
CJJ81176_RS03465	Cj0716	putative phospho-2-dehydro-3-deoxyheptonate aldolase	E	1.81431	0.963533
CJJ81176_RS03470	Cj0717	putative ArsC family protein	P	1.98296	0.456706
CJJ81176_RS03490	Cj0721c	putative integral membrane protein. Functional classification-Membranes, lipoproteins and porins	Uncategorized	1.11656	0.651936
CJJ81176_RS03495	Cj0722c	putative DNA methylase	J	1.69424	0.159466
CJJ81176_RS03505	Cj0724	hypothetical protein Cj0724	Uncategorized	2.04274	1.30115
CJJ81176_RS03525	Cj0728	putative periplasmic protein	S	2.12379	0.158014
CJJ81176_RS03560	Cj0735	putative periplasmic protein	Uncategorized	1.10999	0.54591
CJJ81176_RS03565	Cj0736	hypothetical protein Cj0736	Uncategorized	0.452862	0.449265
CJJ81176_RS03615		hypothetical protein	Uncategorized	0.0535927	0.986524
CJJ81176_RS03670	aspB	aspartate aminotransferase	E	0.4056	0.799666
CJJ81176_RS03755	tpx	thiol peroxidase	O	0.735551	0.780008
CJJ81176_RS03910	nadE	NH(3)-dependent NAD(+) synthetase	H	0.29468	0.475352
CJJ81176_RS03935	glnH	putative glutamine binding periplasmic protein	ET	1.60362	0.77151
CJJ81176_RS04005	Cj0833c	putative oxidoreductase	C	0.127556	0.300369
CJJ81176_RS04015	acnB	aconitate hydratase	C	0.073806	1.32895
CJJ81176_RS04105	hemL	glutamate-1-semialdehyde 2,1-aminomutase	H	0.20619	0.487909
CJJ81176_RS04160		thiol:disulfide interchange protein DsbA	O	1.46547	1.12636
CJJ81176_RS04185		cytochrome c	C	0.488815	1.57262
CJJ81176_RS04195	Cj0878	hypothetical protein Cj0878	Uncategorized	2.43894	0.0349466
CJJ81176_RS04300	Cj0898	putative histidine triad (HIT) family protein	FGR	2.58201	1.21011
CJJ81176_RS04325	Cj0903c	putative amino-acid transport protein	E	1.46378	1.74442
CJJ81176_RS04350	Cj0909	putative periplasmic protein	P	0.521497	0.258637
CJJ81176_RS04375	ciaB	CiaB protein	M	1.72747	0.350085
CJJ81176_RS04400	Cj0919c	putative ABC-type amino-acid transporter permease protein	E	0.901054	0.791442
CJJ81176_RS04405	Cj0920c	putative ABC-type amino-acid transporter permease protein	E	0.664491	1.37685
CJJ81176_RS04410	peb1A	aspartate/glutamate-binding ABC transporter protein	ET	1.35624	2.16278
CJJ81176_RS04415	pebC	ABC-type amino-acid transporter ATP-binding protein	E	0.616285	1.3671
CJJ81176_RS04425	cheB'	putative MCP protein-glutamate methylesterase	NT	1.88135	0.768411
CJJ81176_RS04480	Cj0935c	putative sodium:amino-acid symporter family protein	R	2.75858	1.28335
CJJ81176_RS04500		hypothetical protein	R	2.49513	1.18091
CJJ81176_RS04685	Cj0962	putative acetyltransferase	KR	2.176	0.391401
CJJ81176_RS04745	Cj0979c	putative secreted nuclease	L	1.13986	0.401548
CJJ81176_RS04895	Cj1009c	conserved hypothetical proetin Cj1009c	S	0.868154	0.245524
CJJ81176_RS05000	mapA	putative liproprotein	Uncategorized	2.0439	0.926294
CJJ81176_RS05025	Cj1034c	putative DnaJ-like protein	K	1.54761	0.065881
CJJ81176_RS05315	yajC	putative preprotein translocase protein	U	1.00806	0.139482
CJJ81176_RS05550		UDP-N-acetyl glucosamine 2-epimerase	M	0.374683	0.0439768
CJJ81176_RS05600	gmhB	D,D-heptose 1,7-bisphosphate phosphatase	E	2.59031	0.619003
CJJ81176_RS05640	Cj1162c	putative heavy-metal-associated domain protein	P	1.56379	1.09069
CJJ81176_RS05745	cfa	cyclopropane-fatty-acyl-phospholipid synthase	I	2.19354	1.80289
CJJ81176_RS05775	cetB	bipartate energy taxis response protein cetB	KT	1.38114	0.434729
CJJ81176_RS05780	cetA	bipartate energy taxis response protein cetA	NT	0.965501	0.476146
CJJ81176_RS05790	dctA	putative C4-dicarboxylate transport protein	C	0.0958999	0.453489
CJJ81176_RS05800	Cj1194	possible phosphate permease	P	0.55232	0.392001
CJJ81176_RS06020	Cj1237c	putative phosphatase	FTP	1.59437	0.802988
CJJ81176_RS06325		N-acetyltransferase	V	0.720953	0.349446
CJJ81176_RS06350	acpP3	putative acyl carrier protein	IQ	1.14417	0.371013
CJJ81176_RS06425	Cj1335	motility accessory factor (function unknown)	S	0.272655	0.353626
CJJ81176_RS06485	Cj1349c	putative fibronectin/fibrinogen-binding protein	J	2.19759	0.204272
CJJ81176_RS06510	ceuD	enterochelin uptake ATP-binding protein	P	3.05839	0.0419877
CJJ81176_RS06550	ppk	polyphosphate kinase	P	0.846656	0.308735
CJJ81176_RS06665	Cj1383c	hypothetical protein Cj1383c	Uncategorized	3.96424	0.945761
CJJ81176_RS06670	Cj1384c	hypothetical protein Cj1384c	S	4.19136	0.94933
CJJ81176_RS06675	katA	catalase	P	5.01208	2.36891
CJJ81176_RS06680	Cj1386	ankyrin-repeat containing protein	T	4.01324	2.693
CJJ81176_RS06750	nadD	putative nicotinate-nucleotide adenylyltransferase	H	1.38537	0.323899
CJJ81176_RS06755	Cj1405	conserved hypothetical protein Cj1405	J	1.3851	0.517559
CJJ81176_RS06925	kpsD	capsule polysaccharide export system periplasmic protein	M	0.733099	0.022456
CJJ81176_RS06980	Cj1456c	putative periplasmic protein	Uncategorized	1.30943	0.477999
CJJ81176_RS07170	Cj1495c	conserved hypothetical protein Cj1495c	S	0.0713146	0.00448916
CJJ81176_RS07205	putP	putative sodium/proline symporter	E	1.09312	0.55013
CJJ81176_RS07210	putA	putative proline dehydrogenase/delta-1-pyrroline-5-carboxylate dehydrogenase	CE	1.94249	1.45316
CJJ81176_RS07230	Cj1507c	putative regulatory protein	K	1.29642	0.970319
CJJ81176_RS07280	moaD	putative molybdopterin converting factor,subunit 1	H	0.712943	0.179974
CJJ81176_RS07315	dapF	diaminopimelate epimerase	E	0.231706	0.351172
CJJ81176_RS07325	Cj1533c	putative helix-turn-helix containing protein	R	0.350008	0.435831
CJJ81176_RS07330	Cj1534c	putative bacterioferritin	PV	2.33581	1.68365
CJJ81176_RS07380	Cj1544c	putative integral membrane protein	GER	0.162672	0.143268
CJJ81176_RS07455	Cj1563c	putative transcriptional regulator	K	0.510516	0.386876
CJJ81176_RS07490	nuoJ	NADH dehydrogenase I chain J	C	0.0662268	0.125269
CJJ81176_RS07535	nuoA	NADH dehydrogenase I chain A	C	0.0587199	0.0202287
CJJ81176_RS07590	Cj1587c	putative ABC transporter	P	2.47178	0.874381
CJJ81176_RS07640	hisG	ATP phosphoribosyltransferase	E	0.432057	0.173989
CJJ81176_RS07690	ispDF	2-C-methyl-D-erythritol 4-phosphate cytidylyltransferase/ 2-C-methyl-D-erythritol 2,4-cyclodiphosphate synthase	I	0.891476	0.323073
CJJ81176_RS07700	Cj1609	putative sulfate adenylyltransferase	P	1.17083	0.413447
CJJ81176_RS07720	Cj1613c	putative pyridoxamine 5'-phosphate oxidase	P	3.28851	1.03426
CJJ81176_RS07725	chuA	haemin uptake system outer membrane receptor	P	5.51814	0.552678
CJJ81176_RS07740	chuD	putative haemin uptake system periplasmic haemin-binding protein	P	4.50334	0.643513
CJJ81176_RS07750	kgtP	alpha-ketoglutarate permease	GEPR	0.39023	0.730332
CJJ81176_RS07800	sdaC	amino acid transporter	E	0.188122	0.517604
CJJ81176_RS07810	Cj1627c	hypothetical protein Cj1627c	Uncategorized	1.21555	0.18469
CJJ81176_RS07815	exbB2	putative exbB/tolQ family transport protein	U	3.38009	0.0603541
CJJ81176_RS07830	Cj1631c	conserved hypothetical protein Cj1631c	Uncategorized	0.96511	0.87108
CJJ81176_RS07965	Cj1658	putative iron permease	P	1.38797	0.363973
CJJ81176_RS07970	p19	periplasmic protein p19	MI	1.89728	0.916561
CJJ81176_RS07975	Cj1660	putative integral membrane protein	S	1.14494	0.0311557
CJJ81176_RS07980	Cj1661	possible ABC transport system permease	V	0.995608	0.226614
CJJ81176_RS07985	Cj1662	putative integral membrane protein	V	1.32343	0.069339
CJJ81176_RS07995	Cj1664	putative periplasmic thiredoxin	O	0.687465	0.04705

## Sheet: Down both
Transcripts that decrease from 2.5 hr to 4 hr				RNA-Seq data			COG enrichment
81-176 gene	Symbol	Annotation	COG category	Difference in INT 407	Difference in Caco-2		COG	Count	p value	FDR	Odds ratio	COG category description
CJJ81176_RS00085	dsbI	disulphide bond formation protein	O	-0.0596612	-0.71156		C	23	6.31875e-08	1.70606e-06	4.76438	Energy production and conversion
CJJ81176_RS00175		cytochrome c	O	-1.17787	-0.411016		J	17	0.0163924	0.221297	1.94299	Translation, ribosomal structure and biogenesis
CJJ81176_RS00180		membrane protein	C	-2.47667	-0.969449		I	4	0.309667	1	1.47484	Lipid transport and metabolism
CJJ81176_RS00245	typA	GTP-binding protein TypA homolog	T	-1.24719	-0.705986		M	8	0.542682	1	1.01333	Cell wall/membrane/envelope biogenesis
CJJ81176_RS00335	fliY	putative flagellar motor switch protein	NU	-0.115814	-0.330281		O	5	0.569848	1	0.998698	Posttranslational modification, protein turnover, chaperones
CJJ81176_RS00470	aspA	aspartate ammonia-lyase	E	-1.55499	-0.906839		N	4	0.580664	1	0.993593	Cell motility
CJJ81176_RS00475	dcuA	anaerobic C4-dicarboxylate transporter	G	-2.5878	-1.2311		E	8	0.64953	1	0.913271	Amino acid transport and metabolism
CJJ81176_RS00560	atpA	ATP synthase F1 sector alpha subunit	C	-1.03836	-0.670556		U	3	0.692299	1	0.844889	Intracellular trafficking, secretion, and vesicular transport
CJJ81176_RS00570	atpD	ATP synthase F1 sector beta subunit	C	-1.28769	-0.419024		G	3	0.703012	1	0.830089	Carbohydrate transport and metabolism
CJJ81176_RS00590	Cj0111	putative periplasmic protein	M	-0.753987	-1.09292		T	3	0.770235	1	0.739043	Signal transduction mechanisms
CJJ81176_RS00805	Cj0154c	putative tetrapyrrole methylase family protein	J	-0.981897	-1.39929		P	4	0.788515	1	0.73571	Inorganic ion transport and metabolism
CJJ81176_RS00875	Cj0168c	putative periplasmic protein	Uncategorized	-0.829197	-0.9199		L	3	0.802812	1	0.695248	Replication, recombination and repair
CJJ81176_RS00920	Cj0182	putative transmembrane transport protein	I	-0.42109	-0.952566		K	2	0.835418	1	0.61313	Transcription
CJJ81176_RS00935		putative phnA domain protein	K	-0.446803	-0.808737		F	2	0.842887	1	0.60149	Nucleotide transport and metabolism
CJJ81176_RS01000	Cj0198c	helicase-like protein	L	-0.41803	-0.504846		R	5	0.845765	1	0.68554	General function prediction only
CJJ81176_RS01045	infC	translation initiation factor IF-3	J	-1.47659	-0.59864		V	1	0.889729	1	0.45211	Defense mechanisms
CJJ81176_RS01090	Cj0225	putative acetyltransferase	J	-0.307655	-0.71244		S	2	0.923604	1	0.466642	Function unknown
CJJ81176_RS01095	argB	acetylglutamate kinase	E	-0.541898	-0.554355		Uncategorized	10	0.941384	1	0.630708	Uncategorized
CJJ81176_RS01100	argD	putative acetylornithine/succinyldiaminopimelate aminotransferase	E	-0.53501	-0.969857		H	1	0.996627	1	0.169311	Coenzyme transport and metabolism
CJJ81176_RS01180	rpmI	50s ribosomal protein L35	J	-0.821203	-0.669663		A	0	1	1	0	RNA processing and modification
CJJ81176_RS01185	rplT	50S ribosomal protein L20	J	-0.0339853	-0.311085		B	0	1	1	0	Chromatin structure and dynamics
CJJ81176_RS01240	Cj0256	putative sulfatase family protein	M	-0.666441	-0.685278		D	0	1	1	0	Cell cycle control, cell division, chromosome partitioning
CJJ81176_RS01245	dgkA	diacylglycerol kinase	I	-0.166659	-0.667122		Y	0	1	1	0	Nuclear structure
CJJ81176_RS01530	fliG	flagellar motor switch protein	N	-1.09015	-0.0583031		Z	0	1	1	0	Cytoskeleton
CJJ81176_RS01535	fliH	putative flagellar assembly protein	NU	-0.590696	-0.451805		W	0	1	1	0	Extracellular structures
CJJ81176_RS01760	cmeB	inner membrane efflux transporter CmeB (multidrug efflux system CmeABC)	V	-0.560871	-0.0619642		X	0	1	1	0	Mobilome: prophages, transposons
CJJ81176_RS01880	Cj0390	putative transmembrane protein	R	-0.188506	-0.375163		Q	0	1	1	0	Secondary metabolites biosynthesis, transport and catabolism
CJJ81176_RS01940	glyA	serine hydroxymethyltransferase	E	-0.502679	-0.289193
CJJ81176_RS02130	sdhA	succinate dehydrogenase flavoprotein subunit	C	-2.43016	-0.597595
CJJ81176_RS02135	sdhB	putative succinate dehydrogenase iron-sulfur protein	C	-2.73193	-0.556568
CJJ81176_RS02140	sdhC	putative succinate dehydrogenase subunit C	C	-1.76829	-0.046584
CJJ81176_RS02455	Cj0505c	putative aminotransferase (degT family). Functional classification-Misc	M	-0.262965	-0.73121
CJJ81176_RS02665	Cj0550	hypothetical protein Cj0550	Uncategorized	-1.54065	-0.0952883
CJJ81176_RS02840	Cj0583	hypothetical protein Cj0583	Uncategorized	-1.19017	-0.293011
CJJ81176_RS02855	ligA	DNA ligase	L	-0.647636	-0.622411
CJJ81176_RS02910	fba	fructose-bisphosphate aldolase	G	-1.51566	-0.293727
CJJ81176_RS03270	kdpB	potassium-transporting ATPase B chain	P	-0.342592	-0.172225
CJJ81176_RS03345	Cj0692c	putative membrane protein	Uncategorized	-1.87115	-1.05219
CJJ81176_RS03550	Cj0733	putative HAD-superfamily hydrolase	E	-1.23784	-0.954595
CJJ81176_RS03570		hemagglutination protein	U	-0.194522	-0.88623
CJJ81176_RS03725	Cj0773c	putative binding-protein dependent transport system permease protein	E	-0.605028	-0.348779
CJJ81176_RS03765	napG	putative ferredoxin	CJ	-3.61644	-0.262563
CJJ81176_RS03770	napH	putative ferredoxin	C	-3.19244	-0.35706
CJJ81176_RS03775	napB	periplasmic nitrate reductase small subunit (cytochrome C-type protein)	CP	-2.26292	-0.0147482
CJJ81176_RS04000	Cj0832c	putative Na+/H+ antiporter family protein	C	-0.992447	-0.32555
CJJ81176_RS04100	Cj0852c	putative integral membrane protein	C	-1.73747	-0.136568
CJJ81176_RS04355	Cj0910	putative periplasmic protein	Uncategorized	-1.25029	-0.59483
CJJ81176_RS04610	Cj0946	putative lipoprotein	M	-0.338307	-0.97745
CJJ81176_RS04635		membrane protein	NT	-0.173073	-0.0545076
CJJ81176_RS04640	purH	phosphoribosylaminoimidazolecarboxamide formyltransferase / IMP cyclohydrolase	F	-0.894928	-0.843755
CJJ81176_RS04660	Cj0957c	hypothetical protein Cj0957c	R	-0.267027	-0.754532
CJJ81176_RS05205	rpsR	30S ribosomal protein S18	J	-0.325739	-0.701449
CJJ81176_RS05400	Cj1111c	putative MarC family integral membrane protein	E	-0.500255	-0.266008
CJJ81176_RS05485	pglH	GalNAc transferase/polymerase	M	-0.178103	-0.123225
CJJ81176_RS05510	htrB	putative lipid A biosynthesis lauroyl acyltransferase	I	-0.116529	-0.329593
CJJ81176_RS05555		beta-1,4-N-acetylgalactosaminyltransferase	M	-0.521561	-0.392222
CJJ81176_RS05675	Cj1169c	putative periplasmic protein	Uncategorized	-0.816323	-0.415745
CJJ81176_RS05680	omp50	50 kda outer membrane protein precursor	Uncategorized	-0.855187	-0.642442
CJJ81176_RS05735	tsf	elongation factor TS	J	-1.03084	-0.361975
CJJ81176_RS05740	rpsB	30S ribosomal protein S2	J	-0.730481	-0.154017
CJJ81176_RS05755	petB	putative ubiquinol-cytochrome C reductase cytochrome B subunit	C	-2.25423	-0.125543
CJJ81176_RS05760	petA	putative ubiquinol-cytochrome C reductase iron-sulfur subunit	C	-1.77971	-0.0817829
CJJ81176_RS05850	atpB	ATP synthase F0 sector A subunit	C	-0.170549	-0.766239
CJJ81176_RS06120	Cj1257c	putative efflux pump	G	-0.295573	-0.43959
CJJ81176_RS06155	hydD	putative hydrogenase maturation protease	C	-2.13572	-0.296931
CJJ81176_RS06295	accB	putative biotin carboxyl carrier protein of acetyl-CoA carboxylase	HI	-0.531084	-0.329869
CJJ81176_RS06475	cdsA	phosphatidate cytidylyltransferase	R	-0.800506	-0.00741128
CJJ81176_RS06535	Cj1356c	putative integral membrane protein	S	-0.431091	-0.181774
CJJ81176_RS06545	nrfH	putative periplasmic cytochrome C	C	-2.86298	-0.138533
CJJ81176_RS06555	Cj1361c	hypothetical protein Cj1361c	T	-0.830993	-0.0394079
CJJ81176_RS06595		peptidase S8	OS	-1.10967	-0.573854
CJJ81176_RS06600	Cj1369	putative permease	F	-1.21691	-0.52481
CJJ81176_RS06725	hydA2	putative Ni/Fe-hydrogenase small subunit	C	-0.626793	-0.146279
CJJ81176_RS06860		membrane protein	M	-1.56067	-0.285322
CJJ81176_RS07070	Cj1475c	hypothetical protein Cj1475c	Uncategorized	-3.50041	-0.162776
CJJ81176_RS07095	rplM	50S ribosomal protein L13	J	-0.538062	-0.730548
CJJ81176_RS07105	Cj1482c	hypothetical protein Cj1482c	L	-0.562304	-0.572558
CJJ81176_RS07115	Cj1484c	putative membrane protein	Uncategorized	-0.828842	-0.243465
CJJ81176_RS07200	Cj1501	conserved hypothetical protein Cj1501	O	-0.287011	-0.399537
CJJ81176_RS07215	selD	putative selenide,water dikinase	E	-0.952997	-0.662086
CJJ81176_RS07295		hypothetical protein	Uncategorized	-0.484134	-0.522659
CJJ81176_RS07300		hypothetical protein	R	-0.0290854	-0.0981199
CJJ81176_RS07470	nuoN	NADH dehydrogenase I chain N	C	-1.3097	-0.150697
CJJ81176_RS07475	nuoM	NADH dehydrogenase I chain M	C	-0.872416	-0.268288
CJJ81176_RS07480	nuoL	NADH dehydrogenase I chain L	CP	-1.83308	-0.410205
CJJ81176_RS07485	nuoK	NADH dehydrogenase I chain K	C	-2.16955	-0.236308
CJJ81176_RS07500	nuoH	NADH dehydrogenase I chain H	C	-1.03578	-0.388233
CJJ81176_RS07505	nuoG	putative NADH dehydrogenase I chain G	CR	-0.735428	-0.0335508
CJJ81176_RS07630	rpoA	DNA-directed RNA polymerase alpha chain	K	-1.40129	-0.71302
CJJ81176_RS07635	rplQ	50S ribosomal protein L17	J	-0.746894	-0.35277
CJJ81176_RS07890	Cj1643	putative periplasmic protein	O	-0.804602	-0.257438
CJJ81176_RS07940	Cj1653c	putative lipoprotein	M	-1.57688	-1.09773
CJJ81176_RS08085	cysQ	CysQ protein homolog	P	-0.0263243	-0.565656
CJJ81176_RS08155	rpsH	30S ribosomal protein S8	J	-0.574772	-0.584913
CJJ81176_RS08170	rplX	50S ribosomal protein L24	J	-1.35747	-0.683696
CJJ81176_RS08215	rplW	50S ribosomal protein L23	J	-0.114748	-0.669985
CJJ81176_RS08230	rpsJ	30S ribosomal protein S10	J	-1.78533	-1.22414
CJJ81176_RS08235	Cj1709c	putative ribosomal pseudouridine synthase	J	-0.678909	-0.37632
CJJ81176_RS08240	Cj1710c	putative metallo-beta-lactamase family protein	J	-0.947433	-0.77983
